# Supplementary material for: Red and Green Algal Origin of Diatom Membrane Transporters: Insights into Environmental Adaptation and Cell Evolution
Source: PubMed Central journal article supplement (PMC3237598; doi:10.1371/journal.pone.0029138), 2011-12-14
Supplement: pone.0029138.s001.pdf [file pone.0029138.s001.pdf]

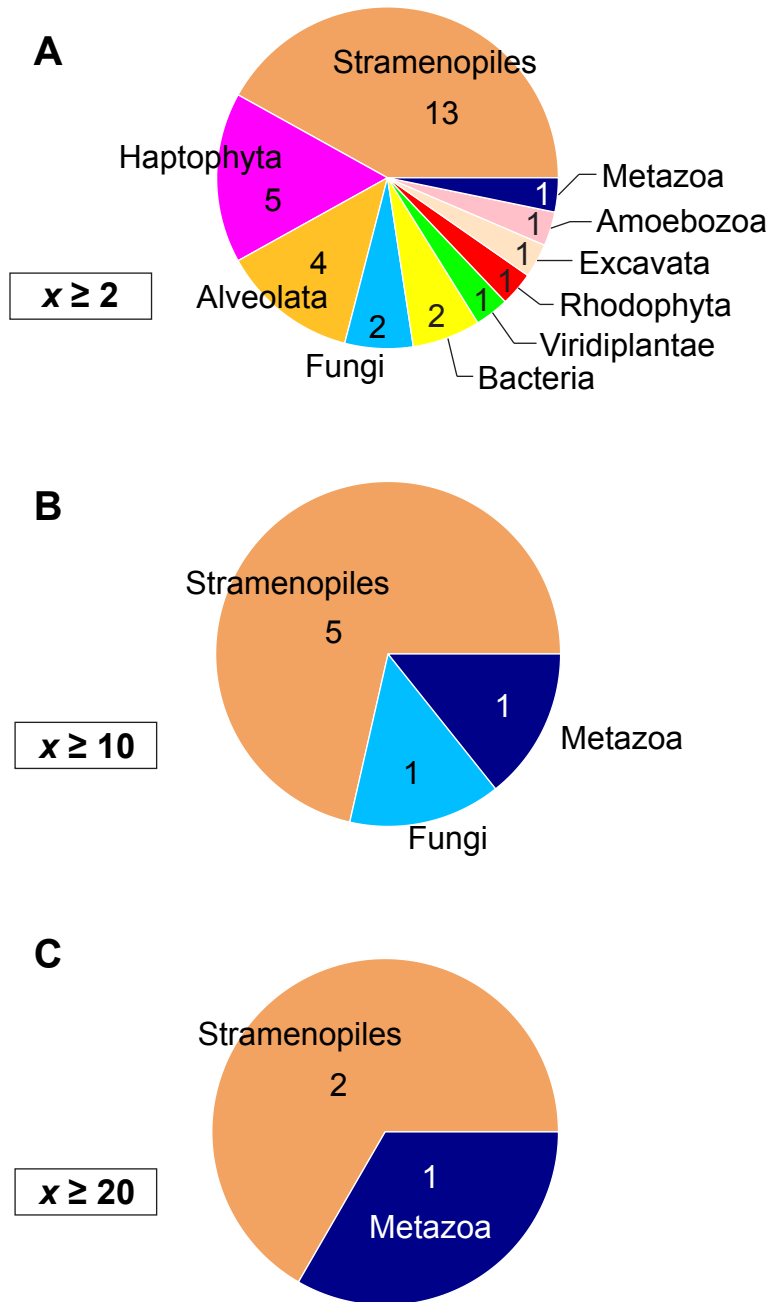

Figure S1
