# Supplementary material for: Red and Green Algal Origin of Diatom Membrane Transporters: Insights into Environmental Adaptation and Cell Evolution
Source: PLoS One. 2011 Dec 14;6(12):e29138. doi: 10.1371/journal.pone.0029138 (PMC3237598; doi:10.1371/journal.pone.0029138)
Supplement: Table S4 — Summary of 1,014 diatom MTs used in this study based on their putative function, gene origin and protein target. (XLSX) [file pone.0029138.s005.xlsx]

## Sheet: Diatom_Transporters_Summary_May
Table S4. Summary of 1,014 diatom MTs used in this study based on their putative function, gene origin and protein target. Shown for each MT protein is GI number of the corresponding protein identifier in JGI, the identifier for the top hit in Swiss-Prot database, number of hits included in the phylogeny (size), MT family classification based on TransportDB, the substrate, putative function, HECT…
Protein	JGI no.	SwissProt Top Hit	Size	MT Family	Substrate	Putative function	HECTAR	Putative E/HGT partner
Stramenopiles-Phaeodactylum_tricornutum_CCAP_1055_1_gi219126965	22921	100	S35A1_HUMAN	DMT	CMP-sialic acid:CMP antiporter	CMP-sialic acid transporter	Signal peptide	Amoebozoa
Stramenopiles-Thalassiosira_pseudonana_CCMP1335_gi224006227	23806	100	S35A2_MOUSE	DMT	UDP-glucuronate/UDP-galactose	UDP-galactose translocator	No N-terminal target peptide	Amoebozoa
Stramenopiles-Phaeodactylum_tricornutum_CCAP_1055_1_gi219130881	50613	100	PAO_ARATH	CEPT	Inner chloroplast membrane translocase (import) Tic55	Pheophorbide a chloroplastic	chloroplast	Haptophyte
Stramenopiles-Phaeodactylum_tricornutum_CCAP_1055_1_gi219114861	18945	100	MFSD5_HUMAN	MFS	?	Major facilitator superfamily domain-containing protein 5	chloroplast	Haptophyte
Stramenopiles-Thalassiosira_pseudonana_CCMP1335_gi223993565	30972	100	MFSD5_HUMAN	MFS	?	Major facilitator superfamily domain-containing protein 5	Signal peptide	Haptophyte
Stramenopiles-Phaeodactylum_tricornutum_CCAP_1055_1_gi219129839	50189	21	-	AAA	ADP:ATP antiporter	Nucleotide transporter 3/TLC ATP/ADP transporter	No N-terminal target peptide	Inconclusive
Stramenopiles-Phaeodactylum_tricornutum_CCAP_1055_1_gi219112183	43280	27	-	AAAP	Amino acid	Amino acid permease	Signal peptide	Inconclusive
Stramenopiles-Phaeodactylum_tricornutum_CCAP_1055_1_gi219127552	49278	51	YH07_SCHPO	AAAP	Amino acid	Amino acid permease	No N-terminal target peptide	Inconclusive
Stramenopiles-Phaeodactylum_tricornutum_CCAP_1055_1_gi219128590	40517	96	YAN9_SCHPO	AAAP	Amino acid	Amino acid permease	No N-terminal target peptide	Inconclusive
Stramenopiles-Thalassiosira_pseudonana_CCMP1335_gi223992831	31085	82	YH07_SCHPO	AAAP	Amino acid	Amino acid permease	No N-terminal target peptide	Inconclusive
Stramenopiles-Thalassiosira_pseudonana_jgi262936	262936	63	-	AAAP	Amino acid	Amino acid/polyamine transporter	Type II signal anchor	Inconclusive
Stramenopiles-Thalassiosira_pseudonana_CCMP1335_gi224015072	11325	4	-	AAAP	Amino acid	Amino acid/polyamine transporter family II protein-like protein	No N-terminal target peptide	Inconclusive
Stramenopiles-Phaeodactylum_tricornutum_CCAP_1055_1_gi219129405	49985	78	S38A6_DANRE	AAAP	Amino acid	Probable sodium-coupled neutral amino acid transporter 6	chloroplast	Inconclusive
Stramenopiles-Phaeodactylum_tricornutum_CCAP_1055_1_gi219118915	45824	27	S36A1_HUMAN	AAAP	Amino acid	Proton-coupled amino acid transporter 1	No N-terminal target peptide	Inconclusive
Stramenopiles-Thalassiosira_pseudonana_CCMP1335_gi224001708	268823	17	S36A1_HUMAN	AAAP	Amino acid	Proton-coupled amino acid transporter 1	No N-terminal target peptide	Inconclusive
Stramenopiles-Phaeodactylum_tricornutum_CCAP_1055_1_gi219127575	39978	23	S36A4_XENLA	AAAP	Amino acid	Proton-coupled amino acid transporter 4	No N-terminal target peptide	Inconclusive
Stramenopiles-Thalassiosira_pseudonana_CCMP1335_gi223994085	26635	97	S36A4_XENLA	AAAP	Amino acid	Proton-coupled amino acid transporter 4	Signal peptide	Inconclusive
Stramenopiles-Phaeodactylum_tricornutum_CCAP_1055_1_gi219129532	50072	87	S38A1_HUMAN	AAAP	Amino acid	Sodium-coupled neutral amino acid transporter 1	Signal peptide	Inconclusive
Stramenopiles-Thalassiosira_pseudonana_CCMP1335_gi223993209	20889	78	S38A1_PONAB	AAAP	Amino acid	Sodium-coupled neutral amino acid transporter 1	Signal peptide	Inconclusive
Stramenopiles-Thalassiosira_pseudonana_CCMP1335_gi224007597	24096	50	S38A1_RAT	AAAP	Amino acid	Sodium-coupled neutral amino acid transporter 1	No N-terminal target peptide	Inconclusive
Stramenopiles-Phaeodactylum_tricornutum_CCAP_1055_1_gi219116927	45260	78	S38AB_MOUSE	AAAP	Amino acid	Sodium-coupled neutral amino acid transporter 11	No N-terminal target peptide	Inconclusive
Stramenopiles-Phaeodactylum_tricornutum_CCAP_1055_1_gi219119109	45969	66	S38AB_MOUSE	AAAP	Amino acid	Sodium-coupled neutral amino acid transporter 11	Signal peptide	Inconclusive
Stramenopiles-Phaeodactylum_tricornutum_CCAP_1055_1_gi219123669	47781	78	S38AB_BOVIN	AAAP	Amino acid	Sodium-coupled neutral amino acid transporter 11	No N-terminal target peptide	Inconclusive
Stramenopiles-Phaeodactylum_tricornutum_CCAP_1055_1_gi219124531	48219	65	S38AB_MACFA	AAAP	Amino acid	Sodium-coupled neutral amino acid transporter 11	No N-terminal target peptide	Inconclusive
Stramenopiles-Phaeodactylum_tricornutum_CCAP_1055_1_gi219127060	49073	60	S38AB_MOUSE	AAAP	Amino acid	Sodium-coupled neutral amino acid transporter 11	No N-terminal target peptide	Inconclusive
Stramenopiles-Phaeodactylum_tricornutum_CCAP_1055_1_gi219127957	49391	34	S38AB_MOUSE	AAAP	Amino acid	Sodium-coupled neutral amino acid transporter 11	No N-terminal target peptide	Inconclusive
Stramenopiles-Phaeodactylum_tricornutum_CCAP_1055_1_gi219129359	50071	91	S38AB_MOUSE	AAAP	Amino acid	Sodium-coupled neutral amino acid transporter 11	Signal peptide	Inconclusive
Stramenopiles-Phaeodactylum_tricornutum_CCAP_1055_1_gi219129625	50146	90	S38AB_MOUSE	AAAP	Amino acid	Sodium-coupled neutral amino acid transporter 11	No N-terminal target peptide	Inconclusive
Stramenopiles-Thalassiosira_pseudonana_CCMP1335_gi224002857	23142	87	S38AB_MOUSE	AAAP	Amino acid	Sodium-coupled neutral amino acid transporter 11	Signal peptide	Inconclusive
Stramenopiles-Thalassiosira_pseudonana_CCMP1335_gi224005649	263385	67	S38AB_DANRE	AAAP	Amino acid	Sodium-coupled neutral amino acid transporter 11	Signal peptide	Inconclusive
Stramenopiles-Thalassiosira_pseudonana_CCMP1335_gi224011355	264534	66	S38AB_MOUSE	AAAP	Amino acid	Sodium-coupled neutral amino acid transporter 11	Type II signal anchor	Inconclusive
Stramenopiles-Thalassiosira_pseudonana_CCMP1335_gi224013251	270139	87	S38AB_MOUSE	AAAP	Amino acid	Sodium-coupled neutral amino acid transporter 11	No N-terminal target peptide	Inconclusive
Stramenopiles-Thalassiosira_pseudonana_CCMP1335_gi223995375	261430	36	S38A7_HUMAN	AAAP	Amino acid	Sodium-coupled neutral amino acid transporter 7	No N-terminal target peptide	Inconclusive
Stramenopiles-Phaeodactylum_tricornutum_CCAP_1055_1_gi219110401	9355	88	AVT1_YEAST	AAAP	Amino acid	Vacuolar amino acid transporter 1	Signal peptide	Inconclusive
Stramenopiles-Thalassiosira_pseudonana_CCMP1335_gi224011373	264537	87	AVT1_YEAST	AAAP	Amino acid	Vacuolar amino acid transporter 1	No N-terminal target peptide	Inconclusive
Stramenopiles-Thalassiosira_pseudonana_CCMP1335_gi223994321	260998	67	AVT2_YEAST	AAAP	Amino acid	Vacuolar amino acid transporter 2	No N-terminal target peptide	Inconclusive
Stramenopiles-Phaeodactylum_tricornutum_CCAP_1055_1_gi219128183	49568	48	AVT3_YEAST	AAAP	Amino acid	Vacuolar amino acid transporter 3	No N-terminal target peptide	Inconclusive
Stramenopiles-Thalassiosira_pseudonana_CCMP1335_gi223998941	262016	48	AVT3_YEAST	AAAP	Amino acid	Vacuolar amino acid transporter 3	Type II signal anchor	Inconclusive
Stramenopiles-Phaeodactylum_tricornutum_CCAP_1055_1_gi219110068	42888	36	AVT6_YEAST	AAAP	Amino acid	Vacuolar amino acid transporter 6	No N-terminal target peptide	Inconclusive
Stramenopiles-Phaeodactylum_tricornutum_CCAP_1055_1_gi219129154	40731	41	AVT6_YEAST	AAAP	Amino acid	Vacuolar amino acid transporter 6	No N-terminal target peptide	Inconclusive
Stramenopiles-Phaeodactylum_tricornutum_CCAP_1055_1_gi219128816	23497	92	AB1A_ARATH	ABC	Cholesterol/phospholipid (ABCA)	ABC transporter a family member 1	Type II signal anchor	Inconclusive
Stramenopiles-Phaeodactylum_tricornutum_CCAP_1055_1_gi219126761	39708	94	ABCA4_DICDI	ABC	Cholesterol/phospholipid (ABCA)	ABC transporter a family member 4	No N-terminal target peptide	Inconclusive
Stramenopiles-Phaeodactylum_tricornutum_CCAP_1055_1_gi219118000	45404	24	ABCX_STRMU	ABC	Molybdenum	ABC transporter ATP-binding protein	Mitochondrial transit peptide	Inconclusive
Stramenopiles-Thalassiosira_pseudonana_CCMP1335_gi224008366	36837	95	ABCB2_DICDI	ABC	Multidrug (P-glycoprotein homolog) (ABCB/MDR-type)	ABC transporter b family member 2	No N-terminal target peptide	Inconclusive
Stramenopiles-Phaeodactylum_tricornutum_CCAP_1055_1_gi219122788	21548	100	ABCB3_DICDI	ABC	Multidrug (P-glycoprotein homolog) (ABCB/MDR-type)	ABC transporter b family member 3	No N-terminal target peptide	Inconclusive
Stramenopiles-Thalassiosira_pseudonana_CCMP1335_gi224006738	36204	75	AB25B_ARATH	ABC	Mitochondrial iron transporter(ABCB/ATM1)	ABC transporter b family member mitochondrial	Signal peptide	Inconclusive
Stramenopiles-Phaeodactylum_tricornutum_CCAP_1055_1_gi219116286	44756	100	AB10G_ARATH	ABC	Multidrug (ABCG/PDR-type)	ABC transporter g family member 10	No N-terminal target peptide	Inconclusive
Stramenopiles-Phaeodactylum_tricornutum_CCAP_1055_1_gi219111693	25218	100	AB18G_ARATH	ABC	White pigment protein homolog (ABCG)	ABC transporter g family member 18	No N-terminal target peptide	Inconclusive
Stramenopiles-Thalassiosira_pseudonana_CCMP1335_gi224007385	36477	100	AB22G_ARATH	ABC	Multidrug (ABCG/PDR-type)	ABC transporter g family member 22	No N-terminal target peptide	Inconclusive
Stramenopiles-Phaeodactylum_tricornutum_CCAP_1055_1_gi219109648	83	90	AB31G_ARATH	ABC	Multidrug (ABCG/PDR-type)	ABC transporter g family member 31	No N-terminal target peptide	Inconclusive
Stramenopiles-Phaeodactylum_tricornutum_CCAP_1055_1_gi219122937	21664	90	AB31G_ARATH	ABC	Multidrug (ABCG/PDR-type)	ABC transporter g family member 31	No N-terminal target peptide	Inconclusive
Stramenopiles-Phaeodactylum_tricornutum_CCAP_1055_1_gi219125716	22629	89	AB31G_ARATH	ABC	Multidrug (ABCG/PDR-type)	ABC transporter g family member 31	No N-terminal target peptide	Inconclusive
Stramenopiles-Thalassiosira_pseudonana_CCMP1335_gi224012335	264773	89	AB31G_ARATH	ABC	Multidrug (ABCG/PDR-type)	ABC transporter g family member 31	No N-terminal target peptide	Inconclusive
Stramenopiles-Thalassiosira_pseudonana_CCMP1335_gi224010479	37637	82	AB36G_ARATH	ABC	Multidrug (ABCG/PDR-type)	ABC transporter g family member 36	No N-terminal target peptide	Inconclusive
Stramenopiles-Phaeodactylum_tricornutum_CCAP_1055_1_gi219123210	5954	10	SSUB1_XANAC	ABC	Iron(III)	Aliphatic sulfonates import ATP-binding protein 1	No N-terminal target peptide	Inconclusive
Stramenopiles-Phaeodactylum_tricornutum_CCAP_1055_1_gi219118180	20026	100	ABCB9_MOUSE	ABC	Mitochondrial peptide export (ABCB/TAP)	ATP-binding cassette sub-family b member 9	Signal peptide	Inconclusive
Stramenopiles-Phaeodactylum_tricornutum_CCAP_1055_1_gi219113437	18473	86	ABCBA_HUMAN	ABC	Mitochondrial peptide export (ABCB/TAP)	ATP-binding cassette sub-family b member mitochondrial	No N-terminal target peptide	Inconclusive
Stramenopiles-Phaeodactylum_tricornutum_CCAP_1055_1_gi219117103	11674	51	ABCB6_XENTR	ABC	Multidrug (P-glycoprotein homolog) (ABCB/MDR-type)	ATP-binding cassette sub-family b member mitochondrial	No N-terminal target peptide	Inconclusive
Stramenopiles-Thalassiosira_pseudonana_CCMP1335_gi223992665	38987	51	ABCB6_RAT	ABC	Multidrug (P-glycoprotein homolog) (ABCB/MDR-type)	ATP-binding cassette sub-family b member mitochondrial	No N-terminal target peptide	Inconclusive
Stramenopiles-Thalassiosira_pseudonana_CCMP1335_gi224011459	38046	93	ABCBA_HUMAN	ABC	Mitochondrial peptide export (ABCB/TAP)	ATP-binding cassette sub-family b member mitochondrial	Signal peptide	Inconclusive
Stramenopiles-Phaeodactylum_tricornutum_CCAP_1055_1_gi219110523	31433	100	ABCG2_MACMU	ABC	Multidrug (ABCG/PDR-type)	ATP-binding cassette sub-family g member 2	No N-terminal target peptide	Inconclusive
Stramenopiles-Phaeodactylum_tricornutum_CCAP_1055_1_gi219112315	25217	100	ABCG2_MACMU	ABC	White pigment protein homolog (ABCG)	ATP-binding cassette sub-family g member 2	No N-terminal target peptide	Inconclusive
Stramenopiles-Phaeodactylum_tricornutum_CCAP_1055_1_gi219124404	14778	100	ABCG2_MACMU	ABC	White pigment protein homolog (ABCG)	ATP-binding cassette sub-family g member 2	No N-terminal target peptide	Inconclusive
Stramenopiles-Thalassiosira_pseudonana_CCMP1335_gi223996721	268364	39	SUFD_ECOLI	ABC	? (Fe-S assembly/SufBCD system)	Cluster assembly protein sufd	No N-terminal target peptide	Inconclusive
Stramenopiles-Phaeodactylum_tricornutum_CCAP_1055_1_gi219111851	18197	98	MRP1_RAT	ABC	Multispecific organic anion/multidrug (ABCC/MRP-type)	Multidrug resistance-associated protein 1	No N-terminal target peptide	Inconclusive
Stramenopiles-Thalassiosira_pseudonana_CCMP1335_gi223999695	33580	87	MRP1_MOUSE	ABC	Multispecific organic anion/multidrug (ABCC/MRP-type)	Multidrug resistance-associated protein 1	Type II signal anchor	Inconclusive
Stramenopiles-Phaeodactylum_tricornutum_CCAP_1055_1_gi219110641	9180	42	MRP4_HUMAN	ABC	Multispecific organic anion/multidrug (ABCC/MRP-type)	Multidrug resistance-associated protein 4	No N-terminal target peptide	Inconclusive
Stramenopiles-Thalassiosira_pseudonana_CCMP1335_gi224012986	38845	40	MRP4_HUMAN	ABC	Multispecific organic anion/multidrug (ABCC/MRP-type)	Multidrug resistance-associated protein 4	Type II signal anchor	Inconclusive
Stramenopiles-Phaeodactylum_tricornutum_CCAP_1055_1_gi219127173	49168	15	NIKA_ECOLI	ABC	Nickel ion	Nickel-binding periplasmic protein	No N-terminal target peptide	Inconclusive
Stramenopiles-Phaeodactylum_tricornutum_CCAP_1055_1_gi219116845	45195	16	-	ABC	Amino acid?	Periplasmic binding protein	Mitochondrial transit peptide	Inconclusive
Stramenopiles-Thalassiosira_pseudonana_CCMP1335_gi223995385	261431	25	PSTB_THEMA	ABC	Phosphate	Phosphate import ATP-binding protein	No N-terminal target peptide	Inconclusive
Stramenopiles-Phaeodactylum_tricornutum_CCAP_1055_1_gi219117149	34685	100	WHITE_DROME	ABC	White pigment protein homolog (ABCG)	Protein white	No N-terminal target peptide	Inconclusive
Stramenopiles-Thalassiosira_pseudonana_CCMP1335_gi223997556	27557	100	WHITE_DROME	ABC	White pigment protein homolog (ABCG)	Protein white	No N-terminal target peptide	Inconclusive
Stramenopiles-Thalassiosira_pseudonana_CCMP1335_gi224004234	263118	10	TAUB_ROSDO	ABC	Nitrate/ taurine/sulfonate?	Taurine import ATP-binding protein	No N-terminal target peptide	Inconclusive
Stramenopiles-Phaeodactylum_tricornutum_CCAP_1055_1_gi219113799	33535	27	Y357_HAEIN	ABC	Nitrate/sulfonate/thiamine?	Thiamine biosynthesis protein hi_0357	Signal peptide	Inconclusive
Stramenopiles-Thalassiosira_pseudonana_CCMP1335_gi224004106	6708	26	Y357_HAEIN	ABC	Thiamine	Thiamine biosynthesis protein hi_0357	Signal peptide	Inconclusive
Stramenopiles-Phaeodactylum_tricornutum_CCAP_1055_1_gi219125714	15212	42	YBHF_ECOLI	ABC	? (ABCA)	Uncharacterized ABC transporter ATP-binding protein	No N-terminal target peptide	Inconclusive
Stramenopiles-Phaeodactylum_tricornutum_CCAP_1055_1_gi219130385	41351	22	YFMR_BACSU	ABC	? (Uup homolog/duplicated ATPase)	Uncharacterized ABC transporter ATP-binding protein	No N-terminal target peptide	Inconclusive
Stramenopiles-Thalassiosira_pseudonana_CCMP1335_gi223993967	260833	20	YFMR_BACSU	ABC	? (Uup homolog/duplicated ATPase)	Uncharacterized ABC transporter ATP-binding protein	No N-terminal target peptide	Inconclusive
Stramenopiles-Thalassiosira_pseudonana_CCMP1335_gi224011367	38095	10	YBBL_ECOLI	ABC	Amino acid	Uncharacterized ABC transporter ATP-binding protein	No N-terminal target peptide	Inconclusive
Stramenopiles-Thalassiosira_pseudonana_CCMP1335_gi223994327	20874	48	Y1647_SYNY3	ABC	? YbbM	UPF0014 membrane protein slr1647	No N-terminal target peptide	Inconclusive
Stramenopiles-Thalassiosira_pseudonana_CCMP1335_gi224011365	30400	53	Y1647_SYNY3	ABC	? YbbM	UPF0014 membrane protein slr1647	Signal peptide	Inconclusive
Stramenopiles-Phaeodactylum_tricornutum_CCAP_1055_1_gi219125988	15102	49	STAR2_ORYSJ	ABC	? (YbbM)	UPF0014 membrane protein star2	Type II signal anchor	Inconclusive
Stramenopiles-Phaeodactylum_tricornutum_CCAP_1055_1_gi219128225	49608	29	Y076_SYNY3	ABC	? (Fe-S assembly/SufBCD system)	UPF0051 protein slr0076	chloroplast	Inconclusive
Stramenopiles-Thalassiosira_pseudonana_CCMP1335_gi224005975	13887	94	YHW5_SCHPO	AE	Boron efflux	Transporter	Type II signal anchor	Inconclusive
Stramenopiles-Phaeodactylum_tricornutum_CCAP_1055_1_gi219118883	45789	9	-	AEC	Auxin efflux?	Membrane transport protein	No N-terminal target peptide	Inconclusive
Stramenopiles-Thalassiosira_pseudonana_CCMP1335_gi224004508	7134	9	-	AEC	Auxin efflux?	Membrane transport protein	No N-terminal target peptide	Inconclusive
Stramenopiles-Phaeodactylum_tricornutum_CCAP_1055_1_gi219116512	11128	100	AMT12_ORYSJ	Amt	Ammonium	Ammonium transporter 1 member 2	Type II signal anchor	Inconclusive
Stramenopiles-Phaeodactylum_tricornutum_CCAP_1055_1_gi219120408	27877	100	AMT12_ARATH	Amt	Ammonium	Ammonium transporter 1 member 2	No N-terminal target peptide	Inconclusive
Stramenopiles-Thalassiosira_pseudonana_CCMP1335_gi224006538	14096	100	AMT12_ORYSJ	Amt	Ammonium	Ammonium transporter 1 member 2	Signal peptide	Inconclusive
Stramenopiles-Phaeodactylum_tricornutum_CCAP_1055_1_gi219115297	10881	100	AMT13_ARATH	Amt	Ammonium	Ammonium transporter 1 member 3	Signal peptide	Inconclusive
Stramenopiles-Phaeodactylum_tricornutum_CCAP_1055_1_gi219112449	51516	55	RHBG_MOUSE	Amt	Ammonium	Ammonium transporter rh type b	Type II signal anchor	Inconclusive
Stramenopiles-Phaeodactylum_tricornutum_CCAP_1055_1_gi219112527	32803	100	ARSA_METTH	ArsAB	Arsenite (ArsA)	Arsenical pump-driving ATPase	chloroplast	Inconclusive
Stramenopiles-Thalassiosira_pseudonana_CCMP1335_gi223994505	1704	100	ARSA_METTH	ArsAB	Arsenite (ArsA)	Arsenical pump-driving ATPase	chloroplast	Inconclusive
Stramenopiles-Phaeodactylum_tricornutum_CCAP_1055_1_gi219126925	22896	100	GET3_COPC7	ArsAB	Arsenite (ArsA)	ATPase get3	No N-terminal target peptide	Inconclusive
Stramenopiles-Thalassiosira_pseudonana_CCMP1335_gi223998178	39841	100	GET3_USTMA	ArsAB	Arsenite (ArsA)	ATPase get3	No N-terminal target peptide	Inconclusive
Stramenopiles-Phaeodactylum_tricornutum_CCAP_1055_1_gi219115876	44788	59	P_HUMAN	ArsB	Tyrosine transporter (P-protein)	P protein	No N-terminal target peptide	Inconclusive
Stramenopiles-Thalassiosira_pseudonana_CCMP1335_gi223999551	262258	58	Y2685_MYCTU	ArsB	Tyrosine transporter (P-protein)	Uncharacterized transporter rv2685 mt2759	Signal peptide	Inconclusive
Stramenopiles-Phaeodactylum_tricornutum_CCAP_1055_1_gi219129058	49978	28	NTCP2_RABIT	BASS	Sodium ion:bile acid symporter	Ileal sodium bile acid cotransporter	No N-terminal target peptide	Inconclusive
Stramenopiles-Phaeodactylum_tricornutum_CCAP_1055_1_gi219116084	44951	20	-	BASS	Sodium ion:bile acid symporter	Membrane transport protein	Signal peptide	Inconclusive
Stramenopiles-Thalassiosira_pseudonana_CCMP1335_gi224013730	263766	29	P3_BOVIN	BASS	Sodium ion:bile acid symporter	P3 protein	Signal peptide	Inconclusive
Stramenopiles-Thalassiosira_pseudonana_CCMP1335_gi223993579	1955	76	NTCP7_HUMAN	BASS	Sodium ion:bile acid symporter	Sodium bile acid cotransporter 7	No N-terminal target peptide	Inconclusive
Stramenopiles-Phaeodactylum_tricornutum_CCAP_1055_1_gi219124986	48315	35	Y1706_HAEIN	BCCT	Glycine betaine/carnitine/choline	Uncharacterized transporter hi_1706	No N-terminal target peptide	Inconclusive
Stramenopiles-Phaeodactylum_tricornutum_jgi17199	17199	67	-	CaCA	Sodium ion:calcium ion+potassium ion antiporter	2-phosphoglycolate phosphatase/Sodium/calcium exchanger protein	No N-terminal target peptide	Inconclusive
Stramenopiles-Thalassiosira_pseudonana_CCMP1335_gi224003231	5856	28	CCX3_ARATH	CaCA	Sodium ion:calcium ion+potassium ion antiporter	Cation calcium exchanger 3	Signal peptide	Inconclusive
Stramenopiles-Thalassiosira_pseudonana_CCMP1335_gi224009528	24815	28	CCX3_ARATH	CaCA	Sodium ion:calcium ion+potassium ion antiporter	Cation calcium exchanger 3	Signal peptide	Inconclusive
Stramenopiles-Thalassiosira_pseudonana_CCMP1335_gi223994587	20990	28	CCX4_ARATH	CaCA	Sodium ion:calcium ion+potassium ion antiporter	Cation calcium exchanger 4	No N-terminal target peptide	Inconclusive
Stramenopiles-Thalassiosira_pseudonana_CCMP1335_gi224001622	4973	54	NCKX2_HUMAN	CaCA	Sodium ion:calcium ion+potassium ion antiporter	Sodium potassium calcium exchanger 2	No N-terminal target peptide	Inconclusive
Stramenopiles-Thalassiosira_pseudonana_CCMP1335_gi224010691	10292	53	NCKX3_RAT	CaCA	Sodium ion:calcium ion+potassium ion antiporter	Sodium potassium calcium exchanger 3	No N-terminal target peptide	Inconclusive
Stramenopiles-Phaeodactylum_tricornutum_CCAP_1055_1_gi219127508	49244	92	NCKX6_HUMAN	CaCA	Sodium ion:calcium ion+potassium ion antiporter	Sodium potassium calcium exchanger 6	Type II signal anchor	Inconclusive
Stramenopiles-Thalassiosira_pseudonana_CCMP1335_gi224003143	269183	75	S12A6_HUMAN	CCC	Potassium ion:chloride ion symporter	Solute carrier family 12 member 6	No N-terminal target peptide	Inconclusive
Stramenopiles-Thalassiosira_pseudonana_CCMP1335_gi224006400	263473	77	S12A6_HUMAN	CCC	Potassium ion:chloride ion symporter	Solute carrier family 12 member 6	Type II signal anchor	Inconclusive
Stramenopiles-Thalassiosira_pseudonana_CCMP1335_gi223992649	260789	55	MTP2_ORYSJ	CDF	Cation efflux	Metal tolerance protein 2	No N-terminal target peptide	Inconclusive
Stramenopiles-Phaeodactylum_tricornutum_CCAP_1055_1_gi219116745	45119	55	MMT2_YEAST	CDF	Cation efflux	Mitochondrial metal transporter 2	Signal peptide	Inconclusive
Stramenopiles-Phaeodactylum_tricornutum_CCAP_1055_1_gi219129104	23557	83	Y3629_DICDI	CDF	Zinc ion efflux	Probable zinc transporter protein ddb_g0283629	No N-terminal target peptide	Inconclusive
Stramenopiles-Thalassiosira_pseudonana_CCMP1335_gi223993821	26530	74	ZNT8_XENLA	CDF	Zinc ion efflux	Zinc transporter 8	No N-terminal target peptide	Inconclusive
Stramenopiles-Phaeodactylum_tricornutum_CCAP_1055_1_gi219124082	47829	5	-	CEPT	Inner chloroplast membrane translocase (import) Tic55	Rieske domain-containing protein	Signal peptide	Inconclusive
Stramenopiles-Thalassiosira_pseudonana_CCMP1335_gi224002793	262849	71	CHRA_PSEAE	CHR	Chromate ion	Chromate transport protein	No N-terminal target peptide	Inconclusive
Stramenopiles-Phaeodactylum_tricornutum_CCAP_1055_1_gi219125516	48511	68	Y718_METJA	CHR	Chromate ion	Uncharacterized transporter mj0718	No N-terminal target peptide	Inconclusive
Stramenopiles-Phaeodactylum_tricornutum_CCAP_1055_1_gi219119700	46097	100	CLCN6_RABIT	ClC	Chloride ion channel	Chloride transport protein 6	No N-terminal target peptide	Inconclusive
Stramenopiles-Thalassiosira_pseudonana_CCMP1335_gi224013975	263848	100	CLCN7_MOUSE	ClC	Chloride ion channel	H(+) Cl(-) exchange transporter 7	Signal peptide	Inconclusive
Stramenopiles-Phaeodactylum_tricornutum_CCAP_1055_1_gi219110233	43052	85	NHX1_YEAST	CPA1	Sodium ion:proton antiporter	Endosomal prevacuolar sodium hydrogen exchanger	Type II signal anchor	Inconclusive
Stramenopiles-Thalassiosira_pseudonana_CCMP1335_gi223999575	4725	60	NHDC2_PONAB	CPA1	Sodium ion:proton antiporter	Mitochondrial sodium hydrogen exchanger nha2	Type II signal anchor	Inconclusive
Stramenopiles-Phaeodactylum_tricornutum_CCAP_1055_1_gi219112923	10409	100	NHX7_ARATH	CPA1	Sodium ion:proton antiporter	Sodium hydrogen exchanger 7	No N-terminal target peptide	Inconclusive
Stramenopiles-Phaeodactylum_tricornutum_CCAP_1055_1_gi219126540	48886	100	NHX7_ARATH	CPA1	Sodium ion:proton antiporter	Sodium hydrogen exchanger 7	Type II signal anchor	Inconclusive
Stramenopiles-Thalassiosira_pseudonana_CCMP1335_gi223996247	27048	100	NHX7_ARATH	CPA1	Sodium ion:proton antiporter	Sodium hydrogen exchanger 7	Signal peptide	Inconclusive
Stramenopiles-Phaeodactylum_tricornutum_CCAP_1055_1_gi219112507	43552	86	SL9A8_CHICK	CPA1	Sodium ion:proton antiporter	Sodium hydrogen exchanger 8	Type II signal anchor	Inconclusive
Stramenopiles-Thalassiosira_pseudonana_CCMP1335_gi223996239	15246	100	NHX8_ARATH	CPA1	Sodium ion:proton antiporter	Sodium hydrogen exchanger 8	No N-terminal target peptide	Inconclusive
Stramenopiles-Thalassiosira_pseudonana_CCMP1335_gi224002108	22767	87	SL9A8_CHICK	CPA1	Sodium ion:proton antiporter	Sodium hydrogen exchanger 8	Signal peptide	Inconclusive
Stramenopiles-Phaeodactylum_tricornutum_CCAP_1055_1_gi219113781	44149	66	CHX17_ARATH	CPA2	Sodium ion:proton antiporter	Cation H(+) antiporter 17	No N-terminal target peptide	Inconclusive
Stramenopiles-Phaeodactylum_tricornutum_CCAP_1055_1_gi219116012	44889	63	CHX17_ARATH	CPA2	Sodium ion:proton antiporter	Cation H(+) antiporter 17	Type II signal anchor	Inconclusive
Stramenopiles-Phaeodactylum_tricornutum_CCAP_1055_1_gi219130628	50516	61	CHX17_ARATH	CPA2	Sodium ion:proton antiporter	Cation H(+) antiporter 17	No N-terminal target peptide	Inconclusive
Stramenopiles-Thalassiosira_pseudonana_CCMP1335_gi224014502	11109	63	CHX17_ARATH	CPA2	Sodium ion:proton antiporter	Cation H(+) antiporter 17	Signal peptide	Inconclusive
Stramenopiles-Thalassiosira_pseudonana_CCMP1335_gi223993151	260975	64	-	CPA2	Sodium ion:proton antiporter	Sodium/hydrogen exchanger	Signal peptide	Inconclusive
Stramenopiles-Thalassiosira_pseudonana_CCMP1335_gi223993355	261078	63	-	CPA2	Sodium ion:proton antiporter	Sodium/hydrogen exchanger	Signal peptide	Inconclusive
Stramenopiles-Phaeodactylum_tricornutum_CCAP_1055_1_gi219118458	45782	85	CTL2_MOUSE	CTL	Sodium ion:choline symporter?	Choline transporter-like protein 2	Type II signal anchor	Inconclusive
Stramenopiles-Thalassiosira_pseudonana_CCMP1335_gi224001702	13326	84	CTL2_DICDI	CTL	Sodium ion:choline symporter?	Choline transporter-like protein 2	Signal peptide	Inconclusive
Stramenopiles-Thalassiosira_pseudonana_CCMP1335_gi224003363	262743	85	CTL5A_DANRE	CTL	Sodium ion:choline symporter?	Choline transporter-like protein 5-a	Type II signal anchor	Inconclusive
Stramenopiles-Thalassiosira_pseudonana_CCMP1335_gi224002244	5607	87	CTLHB_DICDI	CTL	Sodium ion:choline symporter?	CTL-like protein ddb_g0274487	No N-terminal target peptide	Inconclusive
Stramenopiles-Phaeodactylum_tricornutum_CCAP_1055_1_gi219112015	32929	100	PNS1_USTMA	CTL	Sodium ion:choline symporter?	Protein pns1	No N-terminal target peptide	Inconclusive
Stramenopiles-Phaeodactylum_tricornutum_CCAP_1055_1_gi219121585	46998	100	PNS1_CRYNE	CTL	Sodium ion:choline symporter?	Protein pns1	No N-terminal target peptide	Inconclusive
Stramenopiles-Thalassiosira_pseudonana_CCMP1335_gi224001388	22844	100	PNS1_GIBZE	CTL	Sodium ion:choline symporter?	Protein pns1	No N-terminal target peptide	Inconclusive
Stramenopiles-Thalassiosira_pseudonana_CCMP1335_gi224002216	22820	100	PNS1_USTMA	CTL	Sodium ion:choline symporter?	Protein pns1	No N-terminal target peptide	Inconclusive
Stramenopiles-Phaeodactylum_tricornutum_CCAP_1055_1_gi219124047	47805	6	-	Ctr	Copper ion uptake	Ctr copper transporter family	Signal peptide	Inconclusive
Stramenopiles-Phaeodactylum_tricornutum_CCAP_1055_1_gi219129793	50149	68	EAA1_AMBTI	DAACS	Proton/sodium ion:glutamate/aspartate symporter	Excitatory amino acid transporter 1	No N-terminal target peptide	Inconclusive
Stramenopiles-Phaeodactylum_tricornutum_CCAP_1055_1_gi219121206	46672	68	EAA3_RABIT	DAACS	Proton/sodium ion:glutamate/aspartate symporter	Excitatory amino acid transporter 3	No N-terminal target peptide	Inconclusive
Stramenopiles-Thalassiosira_pseudonana_CCMP1335_gi223997008	261650	29	-	DMT	Drug/metabolite?	Carboxylate/amino acid/amine Transporter	Signal peptide	Inconclusive
Stramenopiles-Thalassiosira_pseudonana_CCMP1335_gi224007990	24425	10	-	DMT	Drug/metabolite?	Carboxylate/amino acid/amine transporter	chloroplast	Inconclusive
Stramenopiles-Phaeodactylum_tricornutum_CCAP_1055_1_gi219119389	46194	66	S35A1_HUMAN	DMT	CMP-sialic acid:CMP antiporter	CMP-sialic acid transporter	No N-terminal target peptide	Inconclusive
Stramenopiles-Thalassiosira_pseudonana_CCMP1335_gi223996379	2515	99	S35A1_HUMAN	DMT	CMP-sialic acid:CMP antiporter	CMP-sialic acid transporter	No N-terminal target peptide	Inconclusive
Stramenopiles-Thalassiosira_pseudonana_CCMP1335_gi224007925	36321	38	S35A1_MOUSE	DMT	Nucleotide-sugar	CMP-sialic acid transporter	Signal peptide	Inconclusive
Stramenopiles-Phaeodactylum_tricornutum_CCAP_1055_1_gi219111645	32535	16	-	DMT	Drug/metabolite?	EamA-like transporter family	Signal peptide	Inconclusive
Stramenopiles-Phaeodactylum_tricornutum_CCAP_1055_1_gi219115315	33726	21	-	DMT	Drug/metabolite?	EamA-like transporter family	chloroplast	Inconclusive
Stramenopiles-Phaeodactylum_tricornutum_CCAP_1055_1_gi219118707	45965	27	-	DMT	Drug/metabolite?	EamA-like transporter family	chloroplast	Inconclusive
Stramenopiles-Phaeodactylum_tricornutum_CCAP_1055_1_gi219122418	47352	16	-	DMT	Drug/metabolite?	EamA-like transporter family	chloroplast	Inconclusive
Stramenopiles-Phaeodactylum_tricornutum_CCAP_1055_1_gi219124762	48145	49	-	DMT	Drug/metabolite?	EamA-like transporter family	chloroplast	Inconclusive
Stramenopiles-Phaeodactylum_tricornutum_CCAP_1055_1_gi219130486	50485	4	-	DMT	Nucleotide-sugar	EamA-like transporter family	No N-terminal target peptide	Inconclusive
Stramenopiles-Thalassiosira_pseudonana_CCMP1335_gi224004288	6897	62	-	DMT	Drug/metabolite?	EamA-like transporter family	No N-terminal target peptide	Inconclusive
Stramenopiles-Thalassiosira_pseudonana_CCMP1335_gi224008162	9125	4	-	DMT	Triose phosphate:phosphate translocator	EamA-like transporter family	No N-terminal target peptide	Inconclusive
Stramenopiles-Thalassiosira_pseudonana_jgi36669	36669	100	-	DMT	Triose phosphate:phosphate translocator	EamA-like transporter family	No N-terminal target peptide	Inconclusive
Stramenopiles-Thalassiosira_pseudonana_CCMP1335_gi224011597	38157	61	FUCT1_NEMVE	DMT	GDP-fucose	GDP-fucose transporter 1	No N-terminal target peptide	Inconclusive
Stramenopiles-Thalassiosira_pseudonana_CCMP1335_gi223998108	32706	91	GMT_ASPCL	DMT	GDP-mannose	GDP-mannose transporter	Signal peptide	Inconclusive
Stramenopiles-Phaeodactylum_tricornutum_CCAP_1055_1_gi219109917	9609	91	GONS1_ARATH	DMT	GDP-mannose	GDP-mannose transporter gonst1	No N-terminal target peptide	Inconclusive
Stramenopiles-Phaeodactylum_tricornutum_CCAP_1055_1_gi219118261	45630	74	GONS4_ARATH	DMT	GDP-mannose	GDP-mannose transporter gonst4	No N-terminal target peptide	Inconclusive
Stramenopiles-Thalassiosira_pseudonana_CCMP1335_gi223998396	32610	82	GONS4_ARATH	DMT	Nucleotide-sugar?	GDP-mannose transporter gonst4	No N-terminal target peptide	Inconclusive
Stramenopiles-Thalassiosira_pseudonana_CCMP1335_gi224006548	41694	76	GONS4_ARATH	DMT	GDP-mannose	GDP-mannose transporter gonst4	No N-terminal target peptide	Inconclusive
Stramenopiles-Phaeodactylum_tricornutum_CCAP_1055_1_gi219113179	44118	84	-	DMT	Drug/metabolite?	Hypothetical protein	Type II signal anchor	Inconclusive
Stramenopiles-Phaeodactylum_tricornutum_CCAP_1055_1_gi219117005	45312	14	-	DMT	Drug/metabolite?	Hypothetical protein	No N-terminal target peptide	Inconclusive
Stramenopiles-Thalassiosira_pseudonana_CCMP1335_gi223998945	4100	14	-	DMT	Drug/metabolite?	Hypothetical protein	No N-terminal target peptide	Inconclusive
Stramenopiles-Phaeodactylum_tricornutum_CCAP_1055_1_gi219128908	49849	49	-	DMT	Nucleotide-sugar	Nucleotide-sugar transporter	No N-terminal target peptide	Inconclusive
Stramenopiles-Phaeodactylum_tricornutum_jgi43174	43174	62	-	DMT	GDP-fucose	Nucleotide-sugar transporter	No N-terminal target peptide	Inconclusive
Stramenopiles-Thalassiosira_pseudonana_CCMP1335_gi223992763	1122	37	-	DMT	Nucleotide-sugar	Nucleotide-sugar transporter	No N-terminal target peptide	Inconclusive
Stramenopiles-Phaeodactylum_tricornutum_CCAP_1055_1_gi219121302	46762	15	-	DMT	Drug/metabolite?	Permease of the drug/metabolite transporter	No N-terminal target peptide	Inconclusive
Stramenopiles-Phaeodactylum_tricornutum_CCAP_1055_1_gi219128827	40588	21	-	DMT	Multidrug efflux (SMR)	Permease of the drug/metabolite transporter	No N-terminal target peptide	Inconclusive
Stramenopiles-Thalassiosira_pseudonana_CCMP1335_gi223993995	1197	19	-	DMT	Drug/metabolite?	Permease of the drug/metabolite transporter	No N-terminal target peptide	Inconclusive
Stramenopiles-Phaeodactylum_tricornutum_jgi23380	23380	97	-	DMT	Triose phosphate:phosphate translocator	Phosphate/phosphoenolpyruvate translocator	Signal peptide	Inconclusive
Stramenopiles-Thalassiosira_pseudonana_jgi38085	38085	100	-	DMT	Phosphate:phosphoenolpyruvate translocator	Phosphate/phosphoenolpyruvate translocator	No N-terminal target peptide	Inconclusive
Stramenopiles-Phaeodactylum_tricornutum_CCAP_1055_1_gi219109882	24610	100	PPT3_ORYSJ	DMT	Glucose-6-phosphate:phosphate translocator	Phosphoenolpyruvate phosphate translocator chloroplastic	chloroplast	Inconclusive
Stramenopiles-Phaeodactylum_tricornutum_CCAP_1055_1_gi219111193	54017	100	PPT2_ORYSJ	DMT	Phosphate:phosphoenolpyruvate translocator	Phosphoenolpyruvate phosphate translocator chloroplastic	chloroplast	Inconclusive
Stramenopiles-Thalassiosira_pseudonana_CCMP1335_gi223994731	31635	100	PPT2_ORYSJ	DMT	Phosphate:phosphoenolpyruvate translocator	Phosphoenolpyruvate phosphate translocator chloroplastic	Signal peptide	Inconclusive
Stramenopiles-Thalassiosira_pseudonana_CCMP1335_gi224005433	7341	100	PPT3_ORYSJ	DMT	Triose phosphate:phosphate translocator	Phosphoenolpyruvate phosphate translocator chloroplastic	chloroplast	Inconclusive
Stramenopiles-Phaeodactylum_tricornutum_CCAP_1055_1_gi219119502	7237	45	-	DMT	Multidrug efflux (SMR)	Putative small multi-drug export protein	Signal peptide	Inconclusive
Stramenopiles-Thalassiosira_pseudonana_CCMP1335_gi224000357	33466	45	-	DMT	Multidrug efflux (SMR)	Putative small multi-drug export protein	Signal peptide	Inconclusive
Stramenopiles-Thalassiosira_pseudonana_jgi16075	16075	100	-	DMT	Phosphate:phosphoenolpyruvate translocator	Triose or hexose phosphate/phosphate translocator	No N-terminal target peptide	Inconclusive
Stramenopiles-Thalassiosira_pseudonana_CCMP1335_gi223999721	262320	100	TPT_FLAPR	DMT	Phosphate:phosphoenolpyruvate translocator	Triose phosphate phosphate chloroplastic	Signal peptide	Inconclusive
Stramenopiles-Phaeodactylum_tricornutum_CCAP_1055_1_gi219112741	50742	100	TPT_ORYSJ	DMT	Triose phosphate:phosphate translocator	Triose phosphate phosphate translocator chloroplastic	Type II signal anchor	Inconclusive
Stramenopiles-Thalassiosira_pseudonana_jgi17811	17811	100	-	DMT	Phosphate:phosphoenolpyruvate translocator	Triose phosphate/phosphate translocator	No N-terminal target peptide	Inconclusive
Stramenopiles-Thalassiosira_pseudonana_CCMP1335_gi223993393	16236	100	S35A2_MOUSE	DMT	CMP-sialic acid:CMP antiporter	UDP-galactose translocator	No N-terminal target peptide	Inconclusive
Stramenopiles-Phaeodactylum_tricornutum_CCAP_1055_1_gi219113353	4234	38	S35A3_RAT	DMT	Nucleotide-sugar	UDP-n-acetylglucosamine transporter	Signal peptide	Inconclusive
Stramenopiles-Phaeodactylum_tricornutum_CCAP_1055_1_gi219118307	20120	100	S35A3_HUMAN	DMT	UDP-glucuronate/UDP-galactose	UDP-n-acetylglucosamine transporter	No N-terminal target peptide	Inconclusive
Stramenopiles-Phaeodactylum_tricornutum_CCAP_1055_1_gi219124017	29042	40	S35A3_CANFA	DMT	UDP-glucuronate/UDP-galactose?	UDP-n-acetylglucosamine transporter	No N-terminal target peptide	Inconclusive
Stramenopiles-Phaeodactylum_tricornutum_CCAP_1055_1_gi219126431	22739	100	S35A3_RAT	DMT	UDP-N-acetylglucosamine	UDP-n-acetylglucosamine transporter	No N-terminal target peptide	Inconclusive
Stramenopiles-Thalassiosira_pseudonana_CCMP1335_gi223992607	16344	38	S35A3_RAT	DMT	UDP-N-acetylglucosamine	UDP-n-acetylglucosamine transporter	No N-terminal target peptide	Inconclusive
Stramenopiles-Thalassiosira_pseudonana_CCMP1335_gi224007088	16511	40	S35A3_MOUSE	DMT	UDP-N-acetylglucosamine?	UDP-n-acetylglucosamine transporter	Signal peptide	Inconclusive
Stramenopiles-Thalassiosira_pseudonana_CCMP1335_gi224008893	37116	100	S35A3_MOUSE	DMT	UDP-N-acetylglucosamine	UDP-n-acetylglucosamine transporter	No N-terminal target peptide	Inconclusive
Stramenopiles-Thalassiosira_pseudonana_CCMP1335_gi224009245	9490	100	US74C_DROME	DMT	UDP-glucuronate/UDP-galactose	UDP-sugar transporter ust74c	No N-terminal target peptide	Inconclusive
Stramenopiles-Thalassiosira_pseudonana_CCMP1335_gi223993277	20927	42	YM87_YEAST	DMT	Drug/metabolite?	Uncharacterized membrane protein ymr253c	Type II signal anchor	Inconclusive
Stramenopiles-Phaeodactylum_tricornutum_CCAP_1055_1_gi219115838	44758	4	YVAE_BACSU	DMT	Multidrug efflux (SMR)	Uncharacterized membrane protein yvae	Signal peptide	Inconclusive
Stramenopiles-Thalassiosira_pseudonana_CCMP1335_gi224010339	37640	34	YVAE_BACSU	DMT	Multidrug efflux (SMR)	Uncharacterized membrane protein yvae	Signal peptide	Inconclusive
Stramenopiles-Thalassiosira_pseudonana_CCMP1335_gi224006331	23860	24	Y788_ARCFU	DMT	Drug/metabolite?	Uncharacterized transporter af_0788	No N-terminal target peptide	Inconclusive
Stramenopiles-Phaeodactylum_tricornutum_CCAP_1055_1_gi219116837	26807	67	YMB8_YEAST	DMT	Drug/metabolite?	Uncharacterized vacuolar membrane protein yml018c	Signal peptide	Inconclusive
Stramenopiles-Phaeodactylum_tricornutum_CCAP_1055_1_gi219126788	39727	67	YMB8_YEAST	DMT	Drug/metabolite?	Uncharacterized vacuolar membrane protein yml018c	Type II signal anchor	Inconclusive
Stramenopiles-Phaeodactylum_tricornutum_CCAP_1055_1_gi219111593	43301	33	UPS5_ARATH	DMT	Allantoin (NBUT)	Ureide permease 5	Signal peptide	Inconclusive
Stramenopiles-Thalassiosira_pseudonana_CCMP1335_gi223995339	25933	100	XPT_ARATH	DMT	Triose phosphate:phosphate translocator	Xylulose 5-phosphate phosphate chloroplastic	No N-terminal target peptide	Inconclusive
Stramenopiles-Phaeodactylum_tricornutum_CCAP_1055_1_gi219127202	15844	100	VATH2_CAEEL	F-ATPase	Protons (vacuolar)	Probable v-type proton ATPase subunit h 2	No N-terminal target peptide	Inconclusive
Stramenopiles-Phaeodactylum_tricornutum_CCAP_1055_1_gi219110411	17928	100	VATL_PLECA	F-ATPase	Protons (vacuolar)	V-type proton ATPase 16 kDa proteolipid subunit	No N-terminal target peptide	Inconclusive
Stramenopiles-Phaeodactylum_tricornutum_CCAP_1055_1_gi219120125	13096	100	VATL_PLECA	F-ATPase	Protons (vacuolar)	V-type proton ATPase 16 kDa proteolipid subunit	Signal peptide	Inconclusive
Stramenopiles-Phaeodactylum_tricornutum_CCAP_1055_1_gi219123617	21882	100	VATL_PLECA	F-ATPase	Protons (vacuolar)	V-type proton ATPase 16 kDa proteolipid subunit	No N-terminal target peptide	Inconclusive
Stramenopiles-Phaeodactylum_tricornutum_CCAP_1055_1_gi219125685	22609	100	VATL_PLECA	F-ATPase	Protons (vacuolar)	V-type proton ATPase 16 kDa proteolipid subunit	No N-terminal target peptide	Inconclusive
Stramenopiles-Phaeodactylum_tricornutum_CCAP_1055_1_gi219125949	15145	100	VATL_PLECA	F-ATPase	Protons (vacuolar)	V-type proton ATPase 16 kDa proteolipid subunit	No N-terminal target peptide	Inconclusive
Stramenopiles-Thalassiosira_pseudonana_CCMP1335_gi223995041	2233	100	VATL_PLECA	F-ATPase	Protons (vacuolar)	V-type proton ATPase 16 kDa proteolipid subunit	Signal peptide	Inconclusive
Stramenopiles-Thalassiosira_pseudonana_CCMP1335_gi223995583	261500	100	VATL_PLECA	F-ATPase	Protons (vacuolar)	V-type proton ATPase 16 kDa proteolipid subunit	No N-terminal target peptide	Inconclusive
Stramenopiles-Thalassiosira_pseudonana_CCMP1335_gi224004222	573	100	VATL_PLECA	F-ATPase	Protons (vacuolar)	V-type proton ATPase 16 kDa proteolipid subunit	No N-terminal target peptide	Inconclusive
Stramenopiles-Thalassiosira_pseudonana_CCMP1335_gi224014349	37834	100	VATL_PLECA	F-ATPase	Protons (vacuolar)	V-type proton ATPase 16 kDa proteolipid subunit	Signal peptide	Inconclusive
Stramenopiles-Thalassiosira_pseudonana_CCMP1335_gi223993489	39278	100	VATO_HUMAN	F-ATPase	Protons (vacuolar)	V-type proton ATPase 21 kDa proteolipid subunit	No N-terminal target peptide	Inconclusive
Stramenopiles-Phaeodactylum_tricornutum_CCAP_1055_1_gi219130261	31133	100	VATF_DICDI	F-ATPase	Protons (vacuolar)	V-type proton ATPase subunit f	No N-terminal target peptide	Inconclusive
Stramenopiles-Thalassiosira_pseudonana_CCMP1335_gi224010683	37665	100	VATF_HUMAN	F-ATPase	Protons (vacuolar)	V-type proton ATPase subunit f	No N-terminal target peptide	Inconclusive
Stramenopiles-Phaeodactylum_tricornutum_CCAP_1055_1_gi219111257	43023	100	VATH_MANSE	F-ATPase	Protons (vacuolar)	V-type proton ATPase subunit h	No N-terminal target peptide	Inconclusive
Stramenopiles-Thalassiosira_pseudonana_CCMP1335_gi224004970	263135	100	VATH_MANSE	F-ATPase	Protons (vacuolar)	V-type proton ATPase subunit h	No N-terminal target peptide	Inconclusive
Stramenopiles-Thalassiosira_pseudonana_CCMP1335_gi224006572	23973	72	-	FBT	Biopterin	Hypothetical protein/BT1 family	No N-terminal target peptide	Inconclusive
Stramenopiles-Phaeodactylum_tricornutum_jgi13076	13076	98	-	FNT	Formate/nitrite	Formate/nitrite transporter	No N-terminal target peptide	Inconclusive
Stramenopiles-Thalassiosira_pseudonana_CCMP1335_gi223997254	3393	98	FDHC_METTF	FNT	Formate/nitrite	Probable formate transporter	No N-terminal target peptide	Inconclusive
Stramenopiles-Thalassiosira_pseudonana_CCMP1335_gi223994049	1249	5	-	GIC	Glutamate gated ion channel	Hypothetical protein	Signal peptide	Inconclusive
Stramenopiles-Phaeodactylum_tricornutum_CCAP_1055_1_gi219115041	26190	100	AVP2_ARATH	H+-PPase	Proton (vacuolar)	Pyrophosphate-energized membrane proton pump 2	Signal peptide	Inconclusive
Stramenopiles-Phaeodactylum_tricornutum_CCAP_1055_1_gi219118569	45852	6	-	HAAAP	Tryptophan/tyrosine	Amino acid permease	chloroplast	Inconclusive
Stramenopiles-Thalassiosira_pseudonana_CCMP1335_gi224003129	23295	6	-	HAAAP	Tryptophan/tyrosine	Transmembrane amino acid transporter protein	chloroplast	Inconclusive
Stramenopiles-Phaeodactylum_tricornutum_CCAP_1055_1_gi219122438	2037	100	CNNM2_HUMAN	HCC	Heavy metal ion	Metal transporter cnnm2	Signal peptide	Inconclusive
Stramenopiles-Thalassiosira_pseudonana_CCMP1335_gi223996675	31764	100	CNNM2_HUMAN	HCC	Heavy metal ion	Metal transporter cnnm2	Signal peptide	Inconclusive
Stramenopiles-Phaeodactylum_tricornutum_CCAP_1055_1_gi219123971	14412	20	FTSY_AQUAE	IISP	Signal recognition particle-docking protein FtsY	Cell division protein ftsy homolog	No N-terminal target peptide	Inconclusive
Stramenopiles-Thalassiosira_pseudonana_CCMP1335_gi224013926	36684	20	FTSY_AQUAE	IISP	Signal recognition particle-docking protein FtsY	Cell division protein ftsy homolog	No N-terminal target peptide	Inconclusive
Stramenopiles-Phaeodactylum_tricornutum_CCAP_1055_1_gi219111445	17885	100	SC61G_CAEEL	IISP	Preprotein translocase Sec61 gamma subunit	Protein transport protein sec61 subunit gamma	No N-terminal target peptide	Inconclusive
Stramenopiles-Thalassiosira_pseudonana_CCMP1335_gi224011249	38207	98	S61G1_GRYOR	IISP	Preprotein translocase Sec61 gamma subunit	Protein transport protein sec61 subunit gamma	No N-terminal target peptide	Inconclusive
Stramenopiles-Phaeodactylum_tricornutum_CCAP_1055_1_gi219123108	14212	100	SRPR_DICDI	IISP	Preprotein translocase Sec61 alpha subunit	Signal recognition particle receptor subunit alpha	No N-terminal target peptide	Inconclusive
Stramenopiles-Thalassiosira_pseudonana_CCMP1335_gi224009369	264070	100	SRPR_DICDI	IISP	Signal recognition particle receptor alpha subunit (SR-alpha)	Signal recognition particle receptor subunit alpha	No N-terminal target peptide	Inconclusive
Stramenopiles-Phaeodactylum_tricornutum_CCAP_1055_1_gi219127834	49496	16	IRK6_MOUSE	IRK-C	Inward rectifier potassium ion channel	G protein-activated inward rectifier potassium channel 2	No N-terminal target peptide	Inconclusive
Stramenopiles-Phaeodactylum_tricornutum_CCAP_1055_1_gi219114905	44434	19	IRK1_CAEEL	IRK-C	Inward rectifier potassium ion channel	Inward rectifier potassium channel irk-1	No N-terminal target peptide	Inconclusive
Stramenopiles-Thalassiosira_pseudonana_CCMP1335_gi223997952	3092	16	IRK1_CAEEL	IRK-C	Inward rectifier potassium ion channel	Inward rectifier potassium channel irk-1	No N-terminal target peptide	Inconclusive
Stramenopiles-Phaeodactylum_tricornutum_CCAP_1055_1_gi219112913	10247	79	CTNS_ARATH	LCT	Cystine (Cystinosin homolog)	Cystinosin homolog	No N-terminal target peptide	Inconclusive
Stramenopiles-Thalassiosira_pseudonana_CCMP1335_gi224010223	269820	79	CTNS_DROME	LCT	Cystine (Cystinosin homolog)	Cystinosin homolog	No N-terminal target peptide	Inconclusive
Stramenopiles-Thalassiosira_pseudonana_CCMP1335_gi224013618	36686	79	CTNS_CAEEL	LCT	Cystine (Cystinosin homolog)	Cystinosin homolog	No N-terminal target peptide	Inconclusive
Stramenopiles-Phaeodactylum_tricornutum_CCAP_1055_1_gi219122033	13549	54	MPU1_DROME	LCT	Mannose-P-dolichol utilization defect 1 protein homolog	Mannose-p-dolichol utilization defect 1 protein homolog	Signal peptide	Inconclusive
Stramenopiles-Phaeodactylum_tricornutum_CCAP_1055_1_gi219126952	48999	26	Y1218_HAEIN	LctP	L-lactate	L-lactate permease	No N-terminal target peptide	Inconclusive
Stramenopiles-Thalassiosira_pseudonana_CCMP1335_gi223995907	2087	28	Y1218_HAEIN	LctP	L-lactate	L-lactate permease	No N-terminal target peptide	Inconclusive
Stramenopiles-Phaeodactylum_tricornutum_CCAP_1055_1_gi219126613	22873	100	ADT_CHLKE	MC	ADP:ATP antiporter	Carrier protein	No N-terminal target peptide	Inconclusive
Stramenopiles-Thalassiosira_pseudonana_CCMP1335_gi223993143	39143	100	ADT_CHLKE	MC	ADP:ATP antiporter	Carrier protein	No N-terminal target peptide	Inconclusive
Stramenopiles-Phaeodactylum_tricornutum_CCAP_1055_1_gi219124097	47843	30	YMC1_YEAST	MC	?	Carrier protein mitochondrial	No N-terminal target peptide	Inconclusive
Stramenopiles-Thalassiosira_pseudonana_CCMP1335_gi224012625	25808	30	YMC1_YEAST	MC	2-oxoglutarate/malate?	Carrier protein mitochondrial	No N-terminal target peptide	Inconclusive
Stramenopiles-Phaeodactylum_tricornutum_CCAP_1055_1_gi219115399	18927	96	COLT_DROME	MC	Carnitine/acylcarnitine	Congested-like trachea protein	No N-terminal target peptide	Inconclusive
Stramenopiles-Thalassiosira_pseudonana_CCMP1335_gi223995599	2799	72	-	MC	?	Hypothetical protein	Signal peptide	Inconclusive
Stramenopiles-Thalassiosira_pseudonana_CCMP1335_gi224007389	8426	75	-	MC	?	Hypothetical protein	No N-terminal target peptide	Inconclusive
Stramenopiles-Thalassiosira_pseudonana_CCMP1335_gi224007393	8429	75	-	MC	?	Hypothetical protein	No N-terminal target peptide	Inconclusive
Stramenopiles-Thalassiosira_pseudonana_CCMP1335_gi224010988	25219	73	-	MC	?	Hypothetical protein	Signal peptide	Inconclusive
Stramenopiles-Thalassiosira_pseudonana_CCMP1335_gi224011715	16746	100	M2OM_MOUSE	MC	2-oxoglutarate/malate	Mitochondrial 2-oxoglutarate malate carrier protein	Signal peptide	Inconclusive
Stramenopiles-Thalassiosira_pseudonana_CCMP1335_gi224002527	5924	99	MCAT_MACFA	MC	Carnitine/acylcarnitine	Mitochondrial carnitine acylcarnitine carrier protein	No N-terminal target peptide	Inconclusive
Stramenopiles-Phaeodactylum_tricornutum_CCAP_1055_1_gi219122984	13856	93	MCATL_BOVIN	MC	Carnitine/acylcarnitine	Mitochondrial carnitine acylcarnitine carrier protein cacl	No N-terminal target peptide	Inconclusive
Stramenopiles-Thalassiosira_pseudonana_CCMP1335_gi224001030	34344	70	MCATL_BOVIN	MC	Carnitine/acylcarnitine	Mitochondrial carnitine acylcarnitine carrier protein cacl	No N-terminal target peptide	Inconclusive
Stramenopiles-Thalassiosira_pseudonana_CCMP1335_gi224008114	9087	94	MCATL_HUMAN	MC	Ornithine	Mitochondrial carnitine acylcarnitine carrier protein cacl	No N-terminal target peptide	Inconclusive
Stramenopiles-Phaeodactylum_tricornutum_CCAP_1055_1_gi219118722	12405	82	MCAT_ARATH	MC	Carnitine/acylcarnitine	Mitochondrial carnitine acylcarnitine carrier-like protein	No N-terminal target peptide	Inconclusive
Stramenopiles-Phaeodactylum_tricornutum_CCAP_1055_1_gi219121329	36828	45	MCAT_ARATH	MC	Carnitine/acylcarnitine	Mitochondrial carnitine acylcarnitine carrier-like protein	No N-terminal target peptide	Inconclusive
Stramenopiles-Phaeodactylum_tricornutum_CCAP_1055_1_gi219110042	42874	75	-	MC	?	Mitochondrial carrier protein	Signal peptide	Inconclusive
Stramenopiles-Phaeodactylum_tricornutum_CCAP_1055_1_gi219120731	46612	75	-	MC	?	Mitochondrial carrier protein	No N-terminal target peptide	Inconclusive
Stramenopiles-Phaeodactylum_tricornutum_CCAP_1055_1_gi219121279	46742	75	-	MC	?	Mitochondrial carrier protein	Signal peptide	Inconclusive
Stramenopiles-Thalassiosira_pseudonana_CCMP1335_gi224005677	36088	100	PET8_YEAST	MC	S-adenosylmethionine	Mitochondrial carrier protein pet8	Signal peptide	Inconclusive
Stramenopiles-Phaeodactylum_tricornutum_CCAP_1055_1_gi219118525	35625	48	YHM2_YEAST	MC	?	Mitochondrial DNA replication protein yhm2	chloroplast	Inconclusive
Stramenopiles-Phaeodactylum_tricornutum_CCAP_1055_1_gi219119557	46312	17	YHM2_YEAST	MC	?	Mitochondrial DNA replication protein yhm2	No N-terminal target peptide	Inconclusive
Stramenopiles-Thalassiosira_pseudonana_CCMP1335_gi223998378	3524	46	YHM2_YEAST	MC	?	Mitochondrial DNA replication protein yhm2	No N-terminal target peptide	Inconclusive
Stramenopiles-Thalassiosira_pseudonana_CCMP1335_gi224011337	38111	100	MFTC_HUMAN	MC	Folate	Mitochondrial folate transporter carrier	No N-terminal target peptide	Inconclusive
Stramenopiles-Thalassiosira_pseudonana_CCMP1335_gi223994095	31011	41	GGC1_YEAST	MC	GTP/GDP exchange carrier	Mitochondrial GTP GDP carrier protein 1	No N-terminal target peptide	Inconclusive
Stramenopiles-Phaeodactylum_tricornutum_CCAP_1055_1_gi219115539	19030	100	MPCP_YEAST	MC	Phosphate	Mitochondrial phosphate carrier protein	No N-terminal target peptide	Inconclusive
Stramenopiles-Thalassiosira_pseudonana_CCMP1335_gi223995745	27276	100	MPCP_YEAST	MC	Phosphate	Mitochondrial phosphate carrier protein	No N-terminal target peptide	Inconclusive
Stramenopiles-Thalassiosira_pseudonana_CCMP1335_gi224001880	16772	100	MPCP_YEAST	MC	Phosphate	Mitochondrial phosphate carrier protein	No N-terminal target peptide	Inconclusive
Stramenopiles-Phaeodactylum_tricornutum_CCAP_1055_1_gi219129299	4342	100	MRS3_YEAST	MC	Iron import carrier (MRS3/4)	Mitochondrial RNA-splicing protein mrs3	No N-terminal target peptide	Inconclusive
Stramenopiles-Thalassiosira_pseudonana_CCMP1335_gi224013267	16184	100	MRS4_YEAST	MC	Iron import carrier (MRS3/4)	Mitochondrial RNA-splicing protein mrs4	No N-terminal target peptide	Inconclusive
Stramenopiles-Phaeodactylum_tricornutum_CCAP_1055_1_gi219121752	21379	70	MCFE_DICDI	MC	?	Mitochondrial substrate carrier family protein e	No N-terminal target peptide	Inconclusive
Stramenopiles-Thalassiosira_pseudonana_CCMP1335_gi223996125	32064	70	MCFE_DICDI	MC	Folate?	Mitochondrial substrate carrier family protein e	No N-terminal target peptide	Inconclusive
Stramenopiles-Phaeodactylum_tricornutum_CCAP_1055_1_gi219110399	17914	100	MCFM_DICDI	MC	Folate	Mitochondrial substrate carrier family protein m	Signal peptide	Inconclusive
Stramenopiles-Phaeodactylum_tricornutum_CCAP_1055_1_gi219116807	11866	100	MCFN_DICDI	MC	Phosphate	Mitochondrial substrate carrier family protein n	No N-terminal target peptide	Inconclusive
Stramenopiles-Phaeodactylum_tricornutum_CCAP_1055_1_gi219110563	42474	87	MCFS_DICDI	MC	Carnitine/acylcarnitine	Mitochondrial substrate carrier family protein s	No N-terminal target peptide	Inconclusive
Stramenopiles-Thalassiosira_pseudonana_CCMP1335_gi223994853	31265	89	MCFS_DICDI	MC	Carnitine/acylcarnitine?	Mitochondrial substrate carrier family protein s	No N-terminal target peptide	Inconclusive
Stramenopiles-Phaeodactylum_tricornutum_CCAP_1055_1_gi219119658	35949	100	UCPB_DICDI	MC	?	Mitochondrial substrate carrier family protein ucpb	No N-terminal target peptide	Inconclusive
Stramenopiles-Phaeodactylum_tricornutum_CCAP_1055_1_gi219128619	49764	100	UCPB_DICDI	MC	Dicarboxylate/tricarboxylate	Mitochondrial substrate carrier family protein ucpb	No N-terminal target peptide	Inconclusive
Stramenopiles-Thalassiosira_pseudonana_CCMP1335_gi223994771	21069	100	UCPB_DICDI	MC	Uncoupling protein	Mitochondrial substrate carrier family protein ucpb	No N-terminal target peptide	Inconclusive
Stramenopiles-Thalassiosira_pseudonana_CCMP1335_gi223997622	3748	100	UCPB_DICDI	MC	Uncoupling protein	Mitochondrial substrate carrier family protein ucpb	No N-terminal target peptide	Inconclusive
Stramenopiles-Thalassiosira_pseudonana_CCMP1335_gi223994661	31447	100	MCFW_DICDI	MC	?	Mitochondrial substrate carrier family protein w	No N-terminal target peptide	Inconclusive
Stramenopiles-Phaeodactylum_tricornutum_CCAP_1055_1_gi219113775	3755	100	PM34_HUMAN	MC	Peroxisomal membrane protein PMP34	Peroxisomal membrane protein pmp34	No N-terminal target peptide	Inconclusive
Stramenopiles-Thalassiosira_pseudonana_CCMP1335_gi223996922	261623	100	PM34_HUMAN	MC	Peroxisomal membrane carrier protein	Peroxisomal membrane protein pmp34	No N-terminal target peptide	Inconclusive
Stramenopiles-Phaeodactylum_tricornutum_CCAP_1055_1_gi219124538	22279	100	MPCP_MOUSE	MC	Phosphate	Phosphate carrier mitochondrial	No N-terminal target peptide	Inconclusive
Stramenopiles-Phaeodactylum_tricornutum_CCAP_1055_1_gi219124924	22315	100	MPCP_CAEEL	MC	Phosphate	Phosphate carrier mitochondrial	No N-terminal target peptide	Inconclusive
Stramenopiles-Thalassiosira_pseudonana_CCMP1335_gi223999209	33941	100	BT1_MAIZE	MC	Amyloplast Brittle-1 (BT1) protein homolog	Protein brittle-chloroplastic amyloplastic	Signal peptide	Inconclusive
Stramenopiles-Phaeodactylum_tricornutum_CCAP_1055_1_gi219120725	46607	96	DIF1_CAEEL	MC	Carnitine/acylcarnitine	Protein dif-1	Signal peptide	Inconclusive
Stramenopiles-Phaeodactylum_tricornutum_CCAP_1055_1_gi219115469	5142	99	SAMC_HUMAN	MC	S-adenosylmethionine	S-adenosylmethionine mitochondrial carrier protein	No N-terminal target peptide	Inconclusive
Stramenopiles-Phaeodactylum_tricornutum_CCAP_1055_1_gi219123222	14366	100	SAMC_DANRE	MC	S-adenosylmethionine	S-adenosylmethionine mitochondrial carrier protein	No N-terminal target peptide	Inconclusive
Stramenopiles-Thalassiosira_pseudonana_CCMP1335_gi223997996	3142	84	SAMC_DANRE	MC	S-adenosylmethionine	S-adenosylmethionine mitochondrial carrier protein	chloroplast	Inconclusive
Stramenopiles-Phaeodactylum_tricornutum_CCAP_1055_1_gi219127252	23053	100	S2533_BOVIN	MC	Folate	Solute carrier family 25 member 33	No N-terminal target peptide	Inconclusive
Stramenopiles-Phaeodactylum_tricornutum_CCAP_1055_1_gi219120967	13538	100	S2536_HUMAN	MC	?	Solute carrier family 25 member 36	No N-terminal target peptide	Inconclusive
Stramenopiles-Phaeodactylum_tricornutum_CCAP_1055_1_gi219121533	13752	68	S2540_DANRE	MC	?	Solute carrier family 25 member 40	No N-terminal target peptide	Inconclusive
Stramenopiles-Thalassiosira_pseudonana_CCMP1335_gi223997810	33056	68	S2540_DANRE	MC	2-oxodicarboxylate?	Solute carrier family 25 member 40	No N-terminal target peptide	Inconclusive
Stramenopiles-Thalassiosira_pseudonana_CCMP1335_gi223998750	3906	68	S2540_DANRE	MC	?	Solute carrier family 25 member 40	No N-terminal target peptide	Inconclusive
Stramenopiles-Thalassiosira_pseudonana_CCMP1335_gi224009267	9512	91	YQ73_SCHPO	MC	S-adenosylmethionine?	Uncharacterized mitochondrial carrier	Signal peptide	Inconclusive
Stramenopiles-Phaeodactylum_tricornutum_CCAP_1055_1_gi219110349	54049	75	ACATN_HUMAN	MFS	Acetyl-CoA:CoA antiporter	Acetyl-Coenzyme A transporter 1	No N-terminal target peptide	Inconclusive
Stramenopiles-Thalassiosira_pseudonana_CCMP1335_gi224011545	38149	76	ACATN_HUMAN	MFS	Acetyl-CoA:CoA antiporter	Acetyl-Coenzyme A transporter 1	Type II signal anchor	Inconclusive
Stramenopiles-Phaeodactylum_tricornutum_CCAP_1055_1_gi219112307	43382	24	-	MFS	?	D-galactonate transporter	No N-terminal target peptide	Inconclusive
Stramenopiles-Thalassiosira_pseudonana_CCMP1335_gi223996980	261640	24	-	MFS	?	D-galactonate transporter/MFS	Signal peptide	Inconclusive
Stramenopiles-Phaeodactylum_tricornutum_CCAP_1055_1_gi219127944	49384	42	FLVC1_FELCA	MFS	Feline Leukemia Virus Subgroup C Receptor (FLVCR) homolog	Feline leukemia virus subgroup c receptor-related protein 1	No N-terminal target peptide	Inconclusive
Stramenopiles-Phaeodactylum_tricornutum_CCAP_1055_1_gi219111953	43611	89	GLPT3_ARATH	MFS	Glycerol-3-phosphate	Glycerol-3-phosphate transporter 3	No N-terminal target peptide	Inconclusive
Stramenopiles-Thalassiosira_pseudonana_CCMP1335_gi224001718	22565	89	GLPT3_ARATH	MFS	Glycerol-3-phosphate	Glycerol-3-phosphate transporter 3	No N-terminal target peptide	Inconclusive
Stramenopiles-Phaeodactylum_tricornutum_CCAP_1055_1_gi219116082	44950	11	-	MFS	?	H+ antiporter protein	No N-terminal target peptide	Inconclusive
Stramenopiles-Phaeodactylum_tricornutum_CCAP_1055_1_gi219129023	40779	8	EXUT_BACSU	MFS	Multidrug efflux?	Hexuronate transporter	Mitochondrial transit peptide	Inconclusive
Stramenopiles-Phaeodactylum_tricornutum_CCAP_1055_1_gi219117760	45558	6	HIAT1_MOUSE	MFS	?	Hippocampus abundant transcript 1 protein	No N-terminal target peptide	Inconclusive
Stramenopiles-Thalassiosira_pseudonana_CCMP1335_gi224006728	263579	100	YHD1_SCHPO	MFS	Phosphate	Inorganic phosphate transporter	Type II signal anchor	Inconclusive
Stramenopiles-Phaeodactylum_tricornutum_CCAP_1055_1_gi219126586	39515	100	PT113_ORYSJ	MFS	Phosphate	Inorganic phosphate transporter 1-13	Mitochondrial transit peptide	Inconclusive
Stramenopiles-Phaeodactylum_tricornutum_CCAP_1055_1_gi219111095	32014	56	-	MFS	?	Major facilitator superfamily	No N-terminal target peptide	Inconclusive
Stramenopiles-Phaeodactylum_tricornutum_CCAP_1055_1_gi219115177	44665	26	-	MFS	?	Major facilitator superfamily	No N-terminal target peptide	Inconclusive
Stramenopiles-Phaeodactylum_tricornutum_CCAP_1055_1_gi219117791	45584	11	-	MFS	Multidrug efflux	Major facilitator superfamily	Type II signal anchor	Inconclusive
Stramenopiles-Phaeodactylum_tricornutum_CCAP_1055_1_gi219118134	35250	5	-	MFS	Tetracycline efflux?	Major facilitator superfamily	No N-terminal target peptide	Inconclusive
Stramenopiles-Phaeodactylum_tricornutum_CCAP_1055_1_gi219118512	45818	10	-	MFS	?	Major facilitator superfamily	No N-terminal target peptide	Inconclusive
Stramenopiles-Phaeodactylum_tricornutum_CCAP_1055_1_gi219120020	46361	8	-	MFS	?	Major facilitator superfamily	No N-terminal target peptide	Inconclusive
Stramenopiles-Phaeodactylum_tricornutum_CCAP_1055_1_gi219122801	47374	47	-	MFS	?	Major facilitator superfamily	No N-terminal target peptide	Inconclusive
Stramenopiles-Phaeodactylum_tricornutum_CCAP_1055_1_gi219125069	48386	5	-	MFS	?	Major facilitator superfamily	No N-terminal target peptide	Inconclusive
Stramenopiles-Phaeodactylum_tricornutum_CCAP_1055_1_gi219128092	49514	27	-	MFS	?	Major facilitator superfamily	No N-terminal target peptide	Inconclusive
Stramenopiles-Thalassiosira_pseudonana_CCMP1335_gi223992603	31674	34	-	MFS	?	Major facilitator superfamily	Signal peptide	Inconclusive
Stramenopiles-Thalassiosira_pseudonana_CCMP1335_gi223995121	261312	61	-	MFS	Metabolite	Major facilitator superfamily	No N-terminal target peptide	Inconclusive
Stramenopiles-Thalassiosira_pseudonana_CCMP1335_gi223998290	261778	51	-	MFS	?	Major facilitator superfamily	Signal peptide	Inconclusive
Stramenopiles-Thalassiosira_pseudonana_CCMP1335_gi223998778	3936	22	-	MFS	?	Major facilitator superfamily	No N-terminal target peptide	Inconclusive
Stramenopiles-Thalassiosira_pseudonana_CCMP1335_gi224014272	264371	8	-	MFS	Multidrug efflux (Bcr/CflA subfamily)	Major facilitator superfamily	No N-terminal target peptide	Inconclusive
Stramenopiles-Phaeodactylum_tricornutum_CCAP_1055_1_gi219112637	43646	56	MFSD1_BOVIN	MFS	?	Major facilitator superfamily domain-containing protein 1	No N-terminal target peptide	Inconclusive
Stramenopiles-Thalassiosira_pseudonana_CCMP1335_gi224001012	262467	83	MFSD1_MOUSE	MFS	?	Major facilitator superfamily domain-containing protein 1	No N-terminal target peptide	Inconclusive
Stramenopiles-Phaeodactylum_tricornutum_CCAP_1055_1_gi219129501	16421	100	MFSD5_HUMAN	MFS	?	Major facilitator superfamily domain-containing protein 5	Signal peptide	Inconclusive
Stramenopiles-Thalassiosira_pseudonana_CCMP1335_gi224005186	263219	100	MFSD5_HUMAN	MFS	?	Major facilitator superfamily domain-containing protein 5	Signal peptide	Inconclusive
Stramenopiles-Thalassiosira_pseudonana_CCMP1335_gi224014106	37793	100	MFSD5_FUGRU	MFS	?	Major facilitator superfamily domain-containing protein 5	No N-terminal target peptide	Inconclusive
Stramenopiles-Thalassiosira_pseudonana_CCMP1335_gi223998602	3756	8	MFSD6_MOUSE	MFS	?	Major facilitator superfamily domain-containing protein 6	No N-terminal target peptide	Inconclusive
Stramenopiles-Thalassiosira_pseudonana_CCMP1335_gi223998652	3803	6	MFSD6_HUMAN	MFS	?	Major facilitator superfamily domain-containing protein 6	No N-terminal target peptide	Inconclusive
Stramenopiles-Phaeodactylum_tricornutum_CCAP_1055_1_gi219128131	49540	25	MFS7A_XENTR	MFS	Feline leukemia virus subgroup C receptor homolog?	Major facilitator superfamily domain-containing protein 7-a	No N-terminal target peptide	Inconclusive
Stramenopiles-Thalassiosira_pseudonana_CCMP1335_gi224000437	268737	25	MFS7A_XENTR	MFS	Feline leukemia virus subgroup C receptor homolog	Major facilitator superfamily domain-containing protein 7-a	Signal peptide	Inconclusive
Stramenopiles-Phaeodactylum_tricornutum_CCAP_1055_1_gi219129012	49936	16	MFS7B_XENTR	MFS	Feline leukemia virus subgroup C receptor homolog	Major facilitator superfamily domain-containing protein 7-b	No N-terminal target peptide	Inconclusive
Stramenopiles-Thalassiosira_pseudonana_CCMP1335_gi224010459	24970	16	MFS7B_XENTR	MFS	Feline leukemia virus subgroup C receptor homolog	Major facilitator superfamily domain-containing protein 7-b	No N-terminal target peptide	Inconclusive
Stramenopiles-Thalassiosira_pseudonana_CCMP1335_gi224013598	8824	25	MFS7B_XENTR	MFS	?	Major facilitator superfamily domain-containing protein 7-b	No N-terminal target peptide	Inconclusive
Stramenopiles-Thalassiosira_pseudonana_CCMP1335_gi224013816	24340	25	MFS7B_XENTR	MFS	Feline leukemia virus subgroup C receptor homolog	Major facilitator superfamily domain-containing protein 7-b	No N-terminal target peptide	Inconclusive
Stramenopiles-Thalassiosira_pseudonana_CCMP1335_gi223995191	2400	5	MFSD8_XENLA	MFS	Multidrug efflux?	Major facilitator superfamily domain-containing protein 8	No N-terminal target peptide	Inconclusive
Stramenopiles-Thalassiosira_pseudonana_CCMP1335_gi224006047	7487	11	MFSD9_MOUSE	MFS	Tetracycline efflux?	Major facilitator superfamily domain-containing protein 9	No N-terminal target peptide	Inconclusive
Stramenopiles-Thalassiosira_pseudonana_CCMP1335_gi223997278	14527	23	YWTG_BACSU	MFS	Sugar	Metabolite transport protein ywtg	No N-terminal target peptide	Inconclusive
Stramenopiles-Thalassiosira_pseudonana_CCMP1335_gi224012407	15688	15	CF192_HUMAN	MFS	?	MFS-type transporter c6orf192	Signal peptide	Inconclusive
Stramenopiles-Phaeodactylum_tricornutum_CCAP_1055_1_gi219111183	32095	50	-	MFS	Oxalate:formate antiporter	Oxalate/formate antiporter	No N-terminal target peptide	Inconclusive
Stramenopiles-Thalassiosira_pseudonana_CCMP1335_gi224005683	7597	48	-	MFS	Oxalate:formate antiporter?	Oxalate/formate antiporter/MFS	No N-terminal target peptide	Inconclusive
Stramenopiles-Thalassiosira_pseudonana_CCMP1335_gi224008426	36858	99	PHT41_ORYSJ	MFS	Phosphate	Probable anion transporter chloroplastic	Signal peptide	Inconclusive
Stramenopiles-Phaeodactylum_tricornutum_CCAP_1055_1_gi219109643	17265	100	PHT17_ORYSJ	MFS	Phosphate	Probable inorganic phosphate transporter 1-7	No N-terminal target peptide	Inconclusive
Stramenopiles-Phaeodactylum_tricornutum_CCAP_1055_1_gi219112867	18469	25	CSBC_BACSU	MFS	Sugar	Probable metabolite transport protein	No N-terminal target peptide	Inconclusive
Stramenopiles-Phaeodactylum_tricornutum_CCAP_1055_1_gi219113291	33590	30	PROP_ECO57	MFS	Proline/betaine	Proline betaine transporter	No N-terminal target peptide	Inconclusive
Stramenopiles-Thalassiosira_pseudonana_CCMP1335_gi223996173	268228	30	PROP_SALTY	MFS	Proline/betaine	Proline betaine transporter	No N-terminal target peptide	Inconclusive
Stramenopiles-Thalassiosira_pseudonana_CCMP1335_gi223997668	3793	24	PROP_SALTY	MFS	Proline/betaine	Proline betaine transporter	No N-terminal target peptide	Inconclusive
Stramenopiles-Thalassiosira_pseudonana_CCMP1335_gi224005208	35318	25	PROP_STAAC	MFS	Proline/betaine	Proline betaine transporter	No N-terminal target peptide	Inconclusive
Stramenopiles-Thalassiosira_pseudonana_CCMP1335_gi224006536	7967	30	PROP_SALTY	MFS	Proline/betaine	Proline betaine transporter	No N-terminal target peptide	Inconclusive
Stramenopiles-Thalassiosira_pseudonana_CCMP1335_gi224006926	7945	39	SPNS1_RAT	MFS	?	Protein spinster homolog 1	No N-terminal target peptide	Inconclusive
Stramenopiles-Phaeodactylum_tricornutum_CCAP_1055_1_gi219118917	27361	100	MYCT_HUMAN	MFS	Proton:myo-inositol symporter	Proton myo-inositol cotransporter	Mitochondrial transit peptide	Inconclusive
Stramenopiles-Thalassiosira_pseudonana_CCMP1335_gi224010746	264410	56	QDR1_YEAST	MFS	Metabolite	Quinidine resistance protein 1	No N-terminal target peptide	Inconclusive
Stramenopiles-Phaeodactylum_tricornutum_CCAP_1055_1_gi219120316	20899	48	SPXM3_ARATH	MFS	?	SPX domain-containing membrane protein at4g22990	Signal peptide	Inconclusive
Stramenopiles-Thalassiosira_pseudonana_CCMP1335_gi224006560	23967	48	SPXM3_ARATH	MFS	?	SPX domain-containing membrane protein at4g22990	No N-terminal target peptide	Inconclusive
Stramenopiles-Thalassiosira_pseudonana_CCMP1335_gi223993627	2010	49	SPXM1_ORYSJ	MFS	Efflux?	SPX domain-containing membrane protein os02g45520	No N-terminal target peptide	Inconclusive
Stramenopiles-Thalassiosira_pseudonana_CCMP1335_gi224006978	269423	50	SPXM1_ORYSJ	MFS	?	SPX domain-containing membrane protein os02g45520	No N-terminal target peptide	Inconclusive
Stramenopiles-Phaeodactylum_tricornutum_CCAP_1055_1_gi219119468	46251	63	SV2A_MOUSE	MFS	Synaptic vesicle neurotransmitter	Synaptic vesicle glycoprotein 2a	No N-terminal target peptide	Inconclusive
Stramenopiles-Thalassiosira_pseudonana_CCMP1335_gi224007028	263542	33	VMAT2_MOUSE	MFS	Vesicular monoamine	Synaptic vesicular amine transporter	No N-terminal target peptide	Inconclusive
Stramenopiles-Thalassiosira_pseudonana_CCMP1335_gi223996407	268286	7	TCR5_ECOLX	MFS	Tetracycline efflux?	Tetracycline resistance class e	No N-terminal target peptide	Inconclusive
Stramenopiles-Phaeodactylum_tricornutum_CCAP_1055_1_gi219112133	43754	11	-	MFS	Tetracycline efflux?	Tetracycline resistance protein	Type II signal anchor	Inconclusive
Stramenopiles-Phaeodactylum_tricornutum_CCAP_1055_1_gi219122553	37674	13	-	MFS	Efflux?	Tetracycline resistance protein/MFS	Signal peptide	Inconclusive
Stramenopiles-Thalassiosira_pseudonana_CCMP1335_gi224008224	263924	10	-	MFS	Multidrug efflux (Bcr/CflA subfamily)	Transporter	Signal peptide	Inconclusive
Stramenopiles-Phaeodactylum_tricornutum_CCAP_1055_1_gi219122656	47253	17	Y2456_MYCTU	MFS	?	Uncharacterized MFS-type transporter rv2456c mt2531	No N-terminal target peptide	Inconclusive
Stramenopiles-Thalassiosira_pseudonana_CCMP1335_gi223992857	1224	20	Y2456_MYCTU	MFS	?	Uncharacterized MFS-type transporter rv2456c mt2531	Signal peptide	Inconclusive
Stramenopiles-Thalassiosira_pseudonana_CCMP1335_gi223997560	3688	19	Y2456_MYCTU	MFS	?	Uncharacterized MFS-type transporter rv2456c mt2531	No N-terminal target peptide	Inconclusive
Stramenopiles-Phaeodactylum_tricornutum_CCAP_1055_1_gi219127636	49343	17	YDDS_BACSU	MFS	?	Uncharacterized MFS-type transporter ydds	Type II signal anchor	Inconclusive
Stramenopiles-Thalassiosira_pseudonana_CCMP1335_gi223994297	268048	32	YWBF_BACSU	MFS	?	Uncharacterized transporter ywbf	Signal peptide	Inconclusive
Stramenopiles-Phaeodactylum_tricornutum_CCAP_1055_1_gi219111129	42927	69	MGTE_THET8	MgtE	Magnesium ion	Magnesium transporter mgte	No N-terminal target peptide	Inconclusive
Stramenopiles-Phaeodactylum_tricornutum_CCAP_1055_1_gi219122955	54748	70	MGTE_ENTFA	MgtE	Magnesium ion	Magnesium transporter mgte	No N-terminal target peptide	Inconclusive
Stramenopiles-Thalassiosira_pseudonana_CCMP1335_gi224012268	25677	70	MGTE_THET8	MgtE	Magnesium ion	Magnesium transporter mgte	chloroplast	Inconclusive
Stramenopiles-Thalassiosira_pseudonana_CCMP1335_gi223992563	924	67	NIP11_MAIZE	MIP	Aquaporin water channel	Aquaporin nip1-1	Signal peptide	Inconclusive
Stramenopiles-Phaeodactylum_tricornutum_CCAP_1055_1_gi219116428	44871	14	GLPF_ECO57	MIP	Aquaporin water channel	Glycerol uptake facilitator protein	Type II signal anchor	Inconclusive
Stramenopiles-Phaeodactylum_tricornutum_CCAP_1055_1_gi219120016	20755	13	PDUF_SALTY	MIP	Aquaporin water channel?	Propanediol diffusion facilitator	No N-terminal target peptide	Inconclusive
Stramenopiles-Thalassiosira_pseudonana_CCMP1335_gi223996417	21332	9	MRS27_ARATH	MIT	Mitochondrial inner membrane magnesium ion channel protein (MRS2)	Magnesium transporter mrs2-7	No N-terminal target peptide	Inconclusive
Stramenopiles-Phaeodactylum_tricornutum_CCAP_1055_1_gi219127731	49420	11	-	MIT	Mitochondrial inner membrane magnesium ion channel protein (MRS2)	Mg2+ and Co2+ transporters	No N-terminal target peptide	Inconclusive
Stramenopiles-Phaeodactylum_tricornutum_CCAP_1055_1_gi219121750	37260	11	MRS2_SCHPO	MIT	Mitochondrial inner membrane magnesium ion channel protein (MRS2)	Mitochondrial inner membrane magnesium transporter mrs2	No N-terminal target peptide	Inconclusive
Stramenopiles-Phaeodactylum_tricornutum_CCAP_1055_1_gi219113305	44222	14	EDS5_ARATH	MOP	Chloroplast salicylate transporter	Enhanced disease susceptibility 5	chloroplast	Inconclusive
Stramenopiles-Thalassiosira_pseudonana_CCMP1335_gi224010493	37740	96	S47A1_PONAB	MOP	Multidrug efflux	Multidrug and toxin extrusion protein 1	Signal peptide	Inconclusive
Stramenopiles-Thalassiosira_pseudonana_CCMP1335_gi223993877	1083	100	S47A2_MOUSE	MOP	Multidrug efflux	Multidrug and toxin extrusion protein 2	No N-terminal target peptide	Inconclusive
Stramenopiles-Phaeodactylum_tricornutum_CCAP_1055_1_gi219111287	32178	59	RFT1_YARLI	MOP	Oligosaccharidyl-lipid	Oligosaccharide translocation protein rft1	No N-terminal target peptide	Inconclusive
Stramenopiles-Thalassiosira_pseudonana_CCMP1335_gi223992843	267977	5	YL47_SCHPO	MOP	Multidrug efflux	Uncharacterized transporter	Signal peptide	Inconclusive
Stramenopiles-Phaeodactylum_tricornutum_CCAP_1055_1_gi219111515	8363	4	TIM10_ARATH	MPT	Inner membrane translocase (import) Tim10	Mitochondrial import inner membrane translocase subunit Tim10	No N-terminal target peptide	Inconclusive
Stramenopiles-Thalassiosira_pseudonana_CCMP1335_gi224009241	26022	14	TIM16_DROME	MPT	Inner membrane translocase (import) Tim16	Mitochondrial import inner membrane translocase subunit Tim16	Signal peptide	Inconclusive
Stramenopiles-Phaeodactylum_tricornutum_CCAP_1055_1_gi219110167	7114	68	TIM22_YARLI	MPT	Inner membrane translocase (import) Tim22	Mitochondrial import inner membrane translocase subunit Tim22	Signal peptide	Inconclusive
Stramenopiles-Thalassiosira_pseudonana_CCMP1335_gi223997844	268574	68	TIM22_YARLI	MPT	Inner membrane translocase (import) Tim22	Mitochondrial import inner membrane translocase subunit Tim22	No N-terminal target peptide	Inconclusive
Stramenopiles-Phaeodactylum_tricornutum_CCAP_1055_1_gi219115361	44351	52	TIM44_YEAST	MPT	Inner membrane translocase (import) Tim44	Mitochondrial import inner membrane translocase subunit Tim44	No N-terminal target peptide	Inconclusive
Stramenopiles-Thalassiosira_pseudonana_CCMP1335_gi224009574	264164	22	TO401_ARATH	MPT	Outer membrane translocase (import) Tom40	Mitochondrial import receptor subunit Tom40 homolog 1	No N-terminal target peptide	Inconclusive
Stramenopiles-Phaeodactylum_tricornutum_CCAP_1055_1_gi219125360	15032	89	GRPE_OCHA4	MPT	Mge1 homolog (motor component)	Protein grpe	No N-terminal target peptide	Inconclusive
Stramenopiles-Thalassiosira_pseudonana_CCMP1335_gi224000333	33653	98	GRPE_RHOPT	MPT	Mge1 homolog (motor component)	Protein grpe	No N-terminal target peptide	Inconclusive
Stramenopiles-Phaeodactylum_tricornutum_CCAP_1055_1_gi219123953	48010	19	-	MPT	Outer membrane translocase (import) Tom40	Translocase of outer mitochondrial membrane 40 (Tom40)	No N-terminal target peptide	Inconclusive
Stramenopiles-Phaeodactylum_tricornutum_CCAP_1055_1_gi219115327	44327	10	YNAI_ECO57	MscS	Small-conductance mechanosensitive ion channel	Family inner membrane protein ynai	No N-terminal target peptide	Inconclusive
Stramenopiles-Phaeodactylum_tricornutum_CCAP_1055_1_gi219126283	48892	16	YNAI_ECO57	MscS	Small-conductance mechanosensitive ion channel	Family inner membrane protein ynai	chloroplast	Inconclusive
Stramenopiles-Thalassiosira_pseudonana_CCMP1335_gi223994489	20952	16	YNAI_ECO57	MscS	Small-conductance mechanosensitive ion channel	Family inner membrane protein ynai	Signal peptide	Inconclusive
Stramenopiles-Thalassiosira_pseudonana_CCMP1335_gi224014092	10404	10	YNAI_ECO57	MscS	Small-conductance mechanosensitive ion channel	Family inner membrane protein ynai	Signal peptide	Inconclusive
Stramenopiles-Phaeodactylum_tricornutum_CCAP_1055_1_gi219117313	45222	17	-	MscS	Small-conductance mechanosensitive ion channel	Mechanosensitive ion channel	No N-terminal target peptide	Inconclusive
Stramenopiles-Phaeodactylum_tricornutum_CCAP_1055_1_gi219117315	45225	12	-	MscS	Small-conductance mechanosensitive ion channel	Mechanosensitive ion channel	No N-terminal target peptide	Inconclusive
Stramenopiles-Phaeodactylum_tricornutum_CCAP_1055_1_gi219126671	39605	17	-	MscS	Small-conductance mechanosensitive ion channel	Mechanosensitive ion channel	No N-terminal target peptide	Inconclusive
Stramenopiles-Thalassiosira_pseudonana_CCMP1335_gi224008008	8979	16	-	MscS	Small-conductance mechanosensitive ion channel	Mechanosensitive ion channel	No N-terminal target peptide	Inconclusive
Stramenopiles-Thalassiosira_pseudonana_CCMP1335_gi223993687	20567	16	-	MscS	Small-conductance mechanosensitive ion channel	Small-conductance mechanosensitive channel	No N-terminal target peptide	Inconclusive
Stramenopiles-Phaeodactylum_tricornutum_CCAP_1055_1_gi219117311	45221	17	Y1861_ARATH	MscS	Small-conductance mechanosensitive ion channel	Uncharacterized mscs family protein at1g78610	No N-terminal target peptide	Inconclusive
Stramenopiles-Thalassiosira_pseudonana_CCMP1335_gi224014262	10403	10	Y415_HELPJ	MscS	Small-conductance mechanosensitive ion channel	Uncharacterized mscs family protein jhp_0969	No N-terminal target peptide	Inconclusive
Stramenopiles-Phaeodactylum_tricornutum_CCAP_1055_1_gi219114767	44310	16	Y5208_ARATH	MscS	Small-conductance mechanosensitive ion channel	Uncharacterized protein at5g12080	No N-terminal target peptide	Inconclusive
Stramenopiles-Phaeodactylum_tricornutum_CCAP_1055_1_gi219130461	50457	17	Y5208_ARATH	MscS	Small-conductance mechanosensitive ion channel	Uncharacterized protein at5g12080	No N-terminal target peptide	Inconclusive
Stramenopiles-Thalassiosira_pseudonana_CCMP1335_gi224001224	22753	11	Y5208_ARATH	MscS	Small-conductance mechanosensitive ion channel	Uncharacterized protein at5g12080	No N-terminal target peptide	Inconclusive
Stramenopiles-Phaeodactylum_tricornutum_CCAP_1055_1_gi219120671	13034	53	SFXN5_MOUSE	MTC	Tricarboxylates	Sideroflexin-5	No N-terminal target peptide	Inconclusive
Stramenopiles-Thalassiosira_pseudonana_CCMP1335_gi224002935	28704	53	SFXN5_HUMAN	MTC	Tricarboxylates	Sideroflexin-5	No N-terminal target peptide	Inconclusive
Stramenopiles-Phaeodactylum_tricornutum_CCAP_1055_1_gi219110743	31650	90	NAT2_ARATH	NCS2	Sodium ion:ascorbic acid symporter	Nucleobase-ascorbate transporter 2	No N-terminal target peptide	Inconclusive
Stramenopiles-Phaeodactylum_tricornutum_CCAP_1055_1_gi219130553	16991	43	YI31_SCHPO	NCS2	Xanthine/uracil	Purine permease	Signal peptide	Inconclusive
Stramenopiles-Thalassiosira_pseudonana_CCMP1335_gi224013174	13485	42	YI31_SCHPO	NCS2	Xanthine/uracil	Purine permease	Signal peptide	Inconclusive
Stramenopiles-Phaeodactylum_tricornutum_CCAP_1055_1_gi219128636	52619	41	UAPA_EMENI	NCS2	Xanthine/uracil	Uric acid-xanthine permease	No N-terminal target peptide	Inconclusive
Stramenopiles-Phaeodactylum_tricornutum_CCAP_1055_1_gi219127048	49064	80	Y1586_HAEIN	NhaC	Sodium ion:proton antiporter	Uncharacterized protein hi_1586	Signal peptide	Inconclusive
Stramenopiles-Phaeodactylum_tricornutum_CCAP_1055_1_gi219121859	42116	48	-	NhaD	Sodium ion:proton antiporter	Anion permease ArsB/NhaD	No N-terminal target peptide	Inconclusive
Stramenopiles-Thalassiosira_pseudonana_CCMP1335_gi224001678	15027	48	-	NhaD	Sodium ion:proton antiporter	Anion permease ArsB/NhaD	No N-terminal target peptide	Inconclusive
Stramenopiles-Phaeodactylum_tricornutum_CCAP_1055_1_gi219125514	48510	29	-	NiCoT	Nickel ion	High-affinity nickel-transport protein	Signal peptide	Inconclusive
Stramenopiles-Phaeodactylum_tricornutum_CCAP_1055_1_gi219122060	47099	40	SEC62_SCHPO	NSCC2	Translocation protein Sec62 homolog	Translocation protein sec62	No N-terminal target peptide	Inconclusive
Stramenopiles-Phaeodactylum_tricornutum_CCAP_1055_1_gi219123174	47656	36	SC6A1_MUSCO	NSS	Sodium ion:neurotransmitter symporter	Sodium-and chloride-dependent gaba transporter 1	No N-terminal target peptide	Inconclusive
Stramenopiles-Phaeodactylum_tricornutum_CCAP_1055_1_gi219111049	42866	28	OXA12_SCHPO	Oxa1	60 KD inner membrane protein OxaA homolog	Mitochondrial inner membrane protein oxa1-2	No N-terminal target peptide	Inconclusive
Stramenopiles-Thalassiosira_pseudonana_CCMP1335_gi224007887	8546	29	OXA12_SCHPO	Oxa1	60 KD inner membrane protein OxaA homolog	Mitochondrial inner membrane protein oxa1-2	No N-terminal target peptide	Inconclusive
Stramenopiles-Phaeodactylum_tricornutum_CCAP_1055_1_gi219111225	9161	79	OXA1L_BOVIN	Oxa1	60 KD inner membrane protein OxaA homolog	Mitochondrial inner membrane protein oxa1l	Signal peptide	Inconclusive
Stramenopiles-Thalassiosira_pseudonana_CCMP1335_gi224001854	262457	79	OXA1L_MOUSE	Oxa1	60 KD inner membrane protein OxaA homolog	Mitochondrial inner membrane protein oxa1l	No N-terminal target peptide	Inconclusive
Stramenopiles-Phaeodactylum_tricornutum_CCAP_1055_1_gi219110795	53964	51	ATC1_SCHPO	P-ATPase	Calcium ion	Calcium-transporting ATPase 1	No N-terminal target peptide	Inconclusive
Stramenopiles-Thalassiosira_pseudonana_CCMP1335_gi224000553	33766	48	ATC1_SCHPO	P-ATPase	Calcium ion	Calcium-transporting ATPase 1	Signal peptide	Inconclusive
Stramenopiles-Thalassiosira_pseudonana_CCMP1335_gi224009247	264016	100	AT2B2_MOUSE	P-ATPase	Calcium ion	Plasma membrane calcium-transporting ATPase 2	Type II signal anchor	Inconclusive
Stramenopiles-Phaeodactylum_tricornutum_CCAP_1055_1_gi219123123	47620	100	AT2B3_HUMAN	P-ATPase	Calcium ion	Plasma membrane calcium-transporting ATPase 3	No N-terminal target peptide	Inconclusive
Stramenopiles-Phaeodactylum_tricornutum_CCAP_1055_1_gi219128788	16222	86	AT133_HUMAN	P-ATPase	Cation	Probable cation-transporting ATPase 13a3	Signal peptide	Inconclusive
Stramenopiles-Thalassiosira_pseudonana_CCMP1335_gi224009205	264004	87	AT134_CHICK	P-ATPase	Cation	Probable cation-transporting ATPase 13a4	No N-terminal target peptide	Inconclusive
Stramenopiles-Phaeodactylum_tricornutum_CCAP_1055_1_gi219130548	55200	100	PMA1_DICDI	P-ATPase	Plasma proton	Probable plasma membrane ATPase	No N-terminal target peptide	Inconclusive
Stramenopiles-Phaeodactylum_tricornutum_CCAP_1055_1_gi219119117	12452	100	ATXB_LEIDO	P-ATPase	Plasma proton	Probable proton ATPase 1b	No N-terminal target peptide	Inconclusive
Stramenopiles-Thalassiosira_pseudonana_CCMP1335_gi224004642	7268	100	ATXB_LEIDO	P-ATPase	Plasma proton	Probable proton ATPase 1b	No N-terminal target peptide	Inconclusive
Stramenopiles-Thalassiosira_pseudonana_CCMP1335_gi223996049	261260	78	Y1401_PYRAB	PiT	Phosphate	Phosphate permease pyrab14010	Signal peptide	Inconclusive
Stramenopiles-Phaeodactylum_tricornutum_CCAP_1055_1_gi219129679	23830	100	PHO4_NEUCR	PiT	Phosphate	Phosphate-repressible phosphate permease	chloroplast	Inconclusive
Stramenopiles-Thalassiosira_pseudonana_CCMP1335_gi224007172	36201	73	S20A2_CRIGR	PiT	Phosphate	Sodium-dependent phosphate transporter 2	chloroplast	Inconclusive
Stramenopiles-Thalassiosira_pseudonana_CCMP1335_gi224006732	263581	67	NPT2A_RABIT	PNaS	Sodium ion:phosphate symporter	Sodium-dependent phosphate transport protein 2a	Signal peptide	Inconclusive
Stramenopiles-Thalassiosira_pseudonana_CCMP1335_gi224008010	24435	68	NPT2A_RABIT	PNaS	Sodium ion:phosphate symporter	Sodium-dependent phosphate transport protein 2a	No N-terminal target peptide	Inconclusive
Stramenopiles-Phaeodactylum_tricornutum_CCAP_1055_1_gi219113535	33266	66	NPT2B_RAT	PNaS	Sodium ion:phosphate symporter	Sodium-dependent phosphate transport protein 2b	No N-terminal target peptide	Inconclusive
Stramenopiles-Phaeodactylum_tricornutum_CCAP_1055_1_gi219122254	47239	66	NPT2B_RAT	PNaS	Sodium ion:phosphate symporter	Sodium-dependent phosphate transport protein 2b	Type II signal anchor	Inconclusive
Stramenopiles-Phaeodactylum_tricornutum_CCAP_1055_1_gi219123191	47666	66	NPT2B_RAT	PNaS	Sodium ion:phosphate symporter	Sodium-dependent phosphate transport protein 2b	No N-terminal target peptide	Inconclusive
Stramenopiles-Phaeodactylum_tricornutum_CCAP_1055_1_gi219123193	47667	66	NPT2B_RAT	PNaS	Sodium ion:phosphate symporter	Sodium-dependent phosphate transport protein 2b	No N-terminal target peptide	Inconclusive
Stramenopiles-Phaeodactylum_tricornutum_CCAP_1055_1_gi219128308	40433	67	NPT2B_RAT	PNaS	Sodium ion:phosphate symporter	Sodium-dependent phosphate transport protein 2b	No N-terminal target peptide	Inconclusive
Stramenopiles-Phaeodactylum_tricornutum_CCAP_1055_1_gi219129079	49842	68	NPT2B_RAT	PNaS	Sodium ion:phosphate symporter	Sodium-dependent phosphate transport protein 2b	Type II signal anchor	Inconclusive
Stramenopiles-Thalassiosira_pseudonana_CCMP1335_gi224008354	8962	68	NPT2B_PONAB	PNaS	Sodium ion:phosphate symporter	Sodium-dependent phosphate transport protein 2b	No N-terminal target peptide	Inconclusive
Stramenopiles-Thalassiosira_pseudonana_CCMP1335_gi224005539	269333	92	PTR2_YEAST	POT	Proton:dipeptide/tripeptide symporter	Peptide transporter ptr2	No N-terminal target peptide	Inconclusive
Stramenopiles-Thalassiosira_pseudonana_CCMP1335_gi223998951	4104	93	PTR26_ARATH	POT	Proton:dipeptide/tripeptide symporter	Probable peptide nitrate transporter at2g02020	No N-terminal target peptide	Inconclusive
Stramenopiles-Phaeodactylum_tricornutum_CCAP_1055_1_gi219122139	47148	92	S15A4_XENLA	POT	Proton:dipeptide/tripeptide symporter	Solute carrier family 15 member 4	No N-terminal target peptide	Inconclusive
Stramenopiles-Phaeodactylum_tricornutum_CCAP_1055_1_gi219127708	49405	14	PEX12_HUMAN	PPI	Peroxisomal protein import (Pex12)	Peroxisome assembly protein 12	No N-terminal target peptide	Inconclusive
Stramenopiles-Thalassiosira_pseudonana_CCMP1335_gi223999807	33680	100	HMDH_PONAB	RND	HMG-CoA reductase homolog	3-hydroxy-3-methylglutaryl-Coenzyme A reductase	No N-terminal target peptide	Inconclusive
Stramenopiles-Phaeodactylum_tricornutum_CCAP_1055_1_gi219130292	16870	100	HMDH2_DICDI	RND	HMG-CoA reductase homolog	3-hydroxy-3-methylglutaryl-Coenzyme A reductase 2	No N-terminal target peptide	Inconclusive
Stramenopiles-Phaeodactylum_tricornutum_CCAP_1055_1_gi219118933	45835	41	NPCL1_RAT	RND	Niemann-Pick type C1 disease protein homolog	Niemann-pick C1-like protein 1	Type II signal anchor	Inconclusive
Stramenopiles-Phaeodactylum_tricornutum_CCAP_1055_1_gi219121057	46867	83	PTHD3_MOUSE	RND	Patched (Ptc) segmentation polarity protein homolog	Patched domain-containing protein 3	No N-terminal target peptide	Inconclusive
Stramenopiles-Phaeodactylum_tricornutum_CCAP_1055_1_gi219121059	46869	82	PTHD3_MOUSE	RND	Patched (Ptc) segmentation polarity protein homolog	Patched domain-containing protein 3	No N-terminal target peptide	Inconclusive
Stramenopiles-Thalassiosira_pseudonana_CCMP1335_gi223995255	268270	86	PTHD3_MOUSE	RND	Niemann-Pick type C1 disease protein homolog	Patched domain-containing protein 3	Signal peptide	Inconclusive
Stramenopiles-Thalassiosira_pseudonana_CCMP1335_gi223995005	21161	43	DISP_DROME	RND	Patched (Ptc) segmentation polarity protein homolog	Protein dispatched	No N-terminal target peptide	Inconclusive
Stramenopiles-Thalassiosira_pseudonana_CCMP1335_gi223997704	21951	41	DISP2_MOUSE	RND	Dispatched segment polarity protein (cholesterol release)	Protein dispatched homolog 2	No N-terminal target peptide	Inconclusive
Stramenopiles-Phaeodactylum_tricornutum_jgi11311	11311	11	-	Sit	Sodium ion:silicon symporter	Cell surface receptor protein/silicon transporter	Type II signal anchor	Inconclusive
Stramenopiles-Phaeodactylum_tricornutum_CCAP_1055_1_gi219128344	23423	12	-	Sit	Sodium ion:silicon symporter	Hypothetical protein/silicon transporter	Type II signal anchor	Inconclusive
Stramenopiles-Phaeodactylum_tricornutum_CCAP_1055_1_gi219126028	48707	11	-	Sit	Sodium ion:silicon symporter	Silicic acid transporter	Type II signal anchor	Inconclusive
Stramenopiles-Thalassiosira_pseudonana_CCMP1335_gi224002056	268895	10	-	Sit	Sodium ion:silicon symporter	Silicic acid transporter	Signal peptide	Inconclusive
Stramenopiles-Thalassiosira_pseudonana_CCMP1335_gi224004538	41392	10	-	Sit	Sodium ion:silicon symporter	Silicic acid transporter	Signal peptide	Inconclusive
Stramenopiles-Thalassiosira_pseudonana_CCMP1335_gi224003147	35133	10	-	Sit	Sodium ion:silicon symporter	SIT3, silicic acid transporter-like protein	Type II signal anchor	Inconclusive
Stramenopiles-Phaeodactylum_tricornutum_CCAP_1055_1_gi219119635	768	99	DUR31_SCHPO	SSS	Urea	Probable urea active transporter 1	Type II signal anchor	Inconclusive
Stramenopiles-Thalassiosira_pseudonana_CCMP1335_gi224007933	24250	99	DUR31_SCHPO	SSS	Urea	Probable urea active transporter 1	Type II signal anchor	Inconclusive
Stramenopiles-Phaeodactylum_tricornutum_CCAP_1055_1_gi219129315	50026	20	-	SSS	Sodium ion:solute symporter	Sodium:solute symporter family	Signal peptide	Inconclusive
Stramenopiles-Phaeodactylum_tricornutum_CCAP_1055_1_gi219129440	50012	57	-	SSS	Sodium ion:solute symporter	Sodium:solute symporter family	Signal peptide	Inconclusive
Stramenopiles-Thalassiosira_pseudonana_CCMP1335_gi224014742	25478	72	-	SulP	Sulfate	Hypothetical protein/permease	No N-terminal target peptide	Inconclusive
Stramenopiles-Phaeodactylum_tricornutum_CCAP_1055_1_gi219125406	38899	78	-	SulP	Sulfate	Sulfate permease and related transporter	No N-terminal target peptide	Inconclusive
Stramenopiles-Thalassiosira_pseudonana_CCMP1335_gi223993547	261147	5	-	SulP	Sulfate	Sulfate transporter	No N-terminal target peptide	Inconclusive
Stramenopiles-Phaeodactylum_tricornutum_CCAP_1055_1_gi219109650	42555	10	YA7B_SCHPO	SulP	Sulfate	Uncharacterized protein	No N-terminal target peptide	Inconclusive
Stramenopiles-Thalassiosira_pseudonana_CCMP1335_gi224001044	22668	11	YA7B_SCHPO	SulP	Sulfate	Uncharacterized protein	No N-terminal target peptide	Inconclusive
Stramenopiles-Thalassiosira_pseudonana_CCMP1335_gi224012405	25725	4	-	Tat	Protein export	Hypothetical protein	chloroplast	Inconclusive
Stramenopiles-Thalassiosira_pseudonana_CCMP1335_gi223997300	3436	4	-	TDT	Tellurite	Tellurite-resistance/dicarboxylate Transporter	No N-terminal target peptide	Inconclusive
Stramenopiles-Thalassiosira_pseudonana_CCMP1335_gi223994697	21043	10	-	Tic110	Protein import-related anion-selective channel Tic110 homolog	Hypothetical protein	chloroplast	Inconclusive
Stramenopiles-Phaeodactylum_tricornutum_CCAP_1055_1_gi219130661	50540	10	-	Tic110	Protein import-related anion-selective channel Tic110 homolog	Translocator of the inner chloroplast envelope 110kD	chloroplast	Inconclusive
Stramenopiles-Phaeodactylum_tricornutum_CCAP_1055_1_gi219127517	49250	6	-	TRP-CC	Transient receptor potential calcium ion channel	Hypothetical protein/polycystin cation channel	No N-terminal target peptide	Inconclusive
Stramenopiles-Phaeodactylum_tricornutum_CCAP_1055_1_gi219124322	38390	9	-	TSUP	?	Sulfite exporter TauE/SafE	Signal peptide	Inconclusive
Stramenopiles-Thalassiosira_pseudonana_CCMP1335_gi223995275	2492	19	-	TSUP	?	Sulfite exporter TauE/SafE	Signal peptide	Inconclusive
Stramenopiles-Thalassiosira_pseudonana_CCMP1335_gi224004252	23417	21	UT1_HUMAN	UT	Urea	Urea transporter 1	Mitochondrial transit peptide	Inconclusive
Stramenopiles-Phaeodactylum_tricornutum_CCAP_1055_1_gi219126831	39772	19	UT2_MOUSE	UT	Urea	Urea transporter 2	No N-terminal target peptide	Inconclusive
Stramenopiles-Thalassiosira_pseudonana_CCMP1335_gi224010263	264305	41	UT2_MOUSE	UT	Urea	Urea transporter 2	No N-terminal target peptide	Inconclusive
Stramenopiles-Thalassiosira_pseudonana_CCMP1335_gi223999197	22202	62	CYAA_ANACY	VIC	Potassium ion channel/adenylyl cyclase fusion protein	Adenylate cyclase	No N-terminal target peptide	Inconclusive
Stramenopiles-Thalassiosira_pseudonana_CCMP1335_gi223999345	4523	71	CYAA_ANACY	VIC	Potassium ion channel/adenylyl cyclase fusion protein	Adenylate cyclase	No N-terminal target peptide	Inconclusive
Stramenopiles-Thalassiosira_pseudonana_CCMP1335_gi224008556	42133	64	CYAA_ANACY	VIC	Potassium ion channel/adenylyl cyclase fusion protein	Adenylate cyclase	No N-terminal target peptide	Inconclusive
Stramenopiles-Phaeodactylum_tricornutum_CCAP_1055_1_gi219112481	43530	29	KCO1_ARATH	VIC	Calcium-activated outward-rectifying potassium ion channel	Calcium-activated outward-rectifying potassium channel 1	Type II signal anchor	Inconclusive
Stramenopiles-Phaeodactylum_tricornutum_CCAP_1055_1_gi219121289	46752	62	-	VIC	Potassium ion channel/adenylyl cyclase fusion protein	Hypothetical protein	No N-terminal target peptide	Inconclusive
Stramenopiles-Phaeodactylum_tricornutum_CCAP_1055_1_gi219120394	46341	4	-	VIC	Potassium ion channel subfamily K	Ion channel	No N-terminal target peptide	Inconclusive
Stramenopiles-Thalassiosira_pseudonana_CCMP1335_gi223997472	3601	12	-	VIC	Potassium ion channel	Ion channel	No N-terminal target peptide	Inconclusive
Stramenopiles-Phaeodactylum_tricornutum_CCAP_1055_1_gi219113467	43878	36	-	VIC	Sodium ion channel	Ion transport protein/polycystin cation channel	No N-terminal target peptide	Inconclusive
Stramenopiles-Thalassiosira_pseudonana_CCMP1335_gi223995263	2481	32	HCN1_HUMAN	VIC	Potassium/sodium hyperpolarization-activated cyclic nucleotide-gated channel	Potassium sodium hyperpolarization-activated cyclic nucleotide-gated channel 1	No N-terminal target peptide	Inconclusive
Stramenopiles-Thalassiosira_pseudonana_CCMP1335_gi224002120	5488	43	HCN1_HUMAN	VIC	Potassium/sodium hyperpolarization-activated cyclic nucleotide-gated potassium ion channel	Potassium sodium hyperpolarization-activated cyclic nucleotide-gated channel 1	No N-terminal target peptide	Inconclusive
Stramenopiles-Thalassiosira_pseudonana_CCMP1335_gi223999393	22313	47	HCN2_HUMAN	VIC	Hyperpolarization activated cyclic nucleotide-gated potassium ion channel	Potassium sodium hyperpolarization-activated cyclic nucleotide-gated channel 2	Mitochondrial transit peptide	Inconclusive
Stramenopiles-Thalassiosira_pseudonana_CCMP1335_gi224014200	25101	24	KCNAL_DROME	VIC	Calcium ion channel?	Potassium voltage-gated channel protein shal	No N-terminal target peptide	Inconclusive
Stramenopiles-Phaeodactylum_tricornutum_CCAP_1055_1_gi219115579	44535	24	KCNQ1_XENLA	VIC	Calcium ion channel?	Potassium voltage-gated channel subfamily kqt member 1	Type II signal anchor	Inconclusive
Stramenopiles-Thalassiosira_pseudonana_CCMP1335_gi223993327	1684	17	KCO6_ARATH	VIC	Calcium-activated outward-rectifying potassium ion channel	Probable calcium-activated outward-rectifying potassium channel 6	Type II signal anchor	Inconclusive
Stramenopiles-Phaeodactylum_tricornutum_CCAP_1055_1_gi219111443	43171	17	KCO5_ARATH	VIC	Calcium-activated outward-rectifying potassium ion channel	Probable calcium-activated outward-rectifying potassium channel chloroplastic	Signal peptide	Inconclusive
Stramenopiles-Thalassiosira_pseudonana_CCMP1335_gi223996291	21277	36	SCNA_ELEEL	VIC	Sodium ion channel	Sodium channel protein	Mitochondrial transit peptide	Inconclusive
Stramenopiles-Phaeodactylum_tricornutum_CCAP_1055_1_gi219112943	54164	38	SCNAA_MOUSE	VIC	Sodium ion channel	Sodium channel protein type 10 subunit alpha	No N-terminal target peptide	Inconclusive
Stramenopiles-Thalassiosira_pseudonana_CCMP1335_gi223998927	22071	31	SCN9A_RABIT	VIC	Sodium ion channel	Sodium channel protein type 9 subunit alpha	No N-terminal target peptide	Inconclusive
Stramenopiles-Phaeodactylum_tricornutum_CCAP_1055_1_gi219126201	15329	38	TPC1_ARATH	VIC	Calcium ion channel	Two pore calcium channel protein 1	Type II signal anchor	Inconclusive
Stramenopiles-Phaeodactylum_tricornutum_CCAP_1055_1_gi219113409	43828	34	CAC1D_DROME	VIC	Sodium ion channel	Voltage-dependent calcium channel type d subunit alpha-1	No N-terminal target peptide	Inconclusive
Stramenopiles-Thalassiosira_pseudonana_CCMP1335_gi223996293	2433	36	CAC1D_DROME	VIC	Sodium ion channel	Voltage-dependent calcium channel type d subunit alpha-1	No N-terminal target peptide	Inconclusive
Stramenopiles-Thalassiosira_pseudonana_CCMP1335_gi223995219	2434	37	CAC1G_RAT	VIC	Sodium ion channel	Voltage-dependent t-type calcium channel subunit alpha-1g	No N-terminal target peptide	Inconclusive
Stramenopiles-Phaeodactylum_tricornutum_CCAP_1055_1_gi219111609	43313	15	-	VIT	Vacuolar ferrous ion uptake?	CCC1-related family of proteins	No N-terminal target peptide	Inconclusive
Stramenopiles-Phaeodactylum_tricornutum_CCAP_1055_1_gi219122866	37632	14	-	VIT	Vacuolar ferrous ion uptake?	CCC1-related family of proteins	No N-terminal target peptide	Inconclusive
Stramenopiles-Thalassiosira_pseudonana_CCMP1335_gi223995613	27208	100	PCL1_SCHPO	VIT	Vacuolar ferrous ion uptake?	Fe(2+) Mn(2+) transporter pcl1	No N-terminal target peptide	Inconclusive
Stramenopiles-Phaeodactylum_tricornutum_CCAP_1055_1_gi219114993	26157	100	-	VIT	Vacuolar ferrous ion uptake?	Nodulin-21 and CCC1-related protein family	No N-terminal target peptide	Inconclusive
Stramenopiles-Thalassiosira_pseudonana_CCMP1335_gi223998588	33035	20	YCF19_GUITH	YggT	Potassium ion uptake?	Uncharacterized protein ycf19	Signal peptide	Inconclusive
Stramenopiles-Phaeodactylum_tricornutum_CCAP_1055_1_gi219119746	36034	27	-	YggT	Potassium ion uptake?	YggT/hypothetical protein	No N-terminal target peptide	Inconclusive
Stramenopiles-Thalassiosira_pseudonana_CCMP1335_gi223992839	260850	58	HKE41_CAEBR	ZIP	Zinc ion	Histidine-rich membrane protein ke4 homolog 1	Signal peptide	Inconclusive
Stramenopiles-Phaeodactylum_tricornutum_CCAP_1055_1_gi219110567	42479	59	HKE42_CAEEL	ZIP	Zinc ion	Histidine-rich membrane protein ke4 homolog 2	Signal peptide	Inconclusive
Stramenopiles-Phaeodactylum_tricornutum_CCAP_1055_1_gi219115818	26405	100	ZUPT_OCEIH	ZIP	Zinc ion	Zinc transporter	Type II signal anchor	Inconclusive
Stramenopiles-Phaeodactylum_tricornutum_CCAP_1055_1_gi219124661	38445	100	ZUPT_CHLCH	ZIP	Zinc ion	Zinc transporter	Type II signal anchor	Inconclusive
Stramenopiles-Phaeodactylum_tricornutum_CCAP_1055_1_gi219124663	22166	100	ZUPT_CHLP8	ZIP	Zinc ion	Zinc transporter	Type II signal anchor	Inconclusive
Stramenopiles-Phaeodactylum_tricornutum_CCAP_1055_1_gi219124665	52343	100	ZUPT_OCEIH	ZIP	Zinc ion	Zinc transporter	Signal peptide	Inconclusive
Stramenopiles-Thalassiosira_pseudonana_CCMP1335_gi223995015	268192	100	ZUPT_OCEIH	ZIP	Zinc ion	Zinc transporter	Signal peptide	Inconclusive
Stramenopiles-Thalassiosira_pseudonana_CCMP1335_gi223995017	32375	100	ZUPT_OCEIH	ZIP	Zinc ion	Zinc transporter	Signal peptide	Inconclusive
Stramenopiles-Thalassiosira_pseudonana_CCMP1335_gi224013558	263800	59	ZUPT_ECO7I	ZIP	Zinc ion	Zinc transporter	Signal peptide	Inconclusive
Stramenopiles-Phaeodactylum_tricornutum_CCAP_1055_1_gi219127965	49400	77	ZTP50_ARATH	ZIP	Zinc ion	Zinc transporter at3g08650	No N-terminal target peptide	Inconclusive
Stramenopiles-Thalassiosira_pseudonana_CCMP1335_gi224002448	268980	77	ZTP50_ARATH	ZIP	Zinc ion	Zinc transporter at3g08650	No N-terminal target peptide	Inconclusive
Stramenopiles-Phaeodactylum_tricornutum_CCAP_1055_1_gi219120941	46780	22	S39A1_TAKRU	ZIP	Zinc ion	Zinc transporter zip1	Signal peptide	Inconclusive
Stramenopiles-Phaeodactylum_tricornutum_CCAP_1055_1_gi219125783	48518	68	S39AE_XENTR	ZIP	Zinc ion	Zinc transporter zip14	Signal peptide	Inconclusive
Stramenopiles-Phaeodactylum_tricornutum_CCAP_1055_1_gi219109900	42755	24	S39A4_BOVIN	ZIP	Zinc ion	Zinc transporter zip4	No N-terminal target peptide	Inconclusive
Stramenopiles-Thalassiosira_pseudonana_CCMP1335_gi223997938	21585	24	S39A4_BOVIN	ZIP	Zinc ion	Zinc transporter zip4	Type II signal anchor	Inconclusive
Stramenopiles-Phaeodactylum_tricornutum_CCAP_1055_1_gi219118720	45974	1	-	AAAP	Amino acid	Transmembrane amino acid transporter protein	No N-terminal target peptide	No tree (< 4 taxa)
Stramenopiles-Thalassiosira_pseudonana_CCMP1335_gi223993835	20633	1	-	AAAP	Amino acid	Transmembrane amino acid transporter protein	No N-terminal target peptide	No tree (< 4 taxa)
Stramenopiles-Thalassiosira_pseudonana_CCMP1335_gi224011992	264740	1	ABCA1_DICDI	ABC	? (ABCA)	ABC transporter a family member 1	Type II signal anchor	No tree (< 4 taxa)
Stramenopiles-Thalassiosira_pseudonana_CCMP1335_gi224011994	16722	1	AB7A_ARATH	ABC	Multidrug? (ABCA)	ABC transporter a family member 7	No N-terminal target peptide	No tree (< 4 taxa)
Stramenopiles-Thalassiosira_pseudonana_CCMP1335_gi224001944	22679	1	ABCX_STRMU	ABC	Molybdenum	ABC transporter ATP-binding protein	No N-terminal target peptide	No tree (< 4 taxa)
Stramenopiles-Thalassiosira_pseudonana_CCMP1335_gi224011193	799	1	ABCB1_DICDI	ABC	Mitochondrial peptide export (ABCB/TAP)	ABC transporter b family member 1	Mitochondrial transit peptide	No tree (< 4 taxa)
Stramenopiles-Thalassiosira_pseudonana_CCMP1335_gi223996163	31928	1	ABCB6_DICDI	ABC	Mitochondrial iron transporter(ABCB/ATM1)	ABC transporter b family member 6	No N-terminal target peptide	No tree (< 4 taxa)
Stramenopiles-Phaeodactylum_tricornutum_CCAP_1055_1_gi219124935	22325	1	AB26B_ARATH	ABC	Multidrug (P-glycoprotein homolog) (ABCB/MDR-type)	ABC transporter b family member chloroplastic	Signal peptide	No tree (< 4 taxa)
Stramenopiles-Phaeodactylum_tricornutum_CCAP_1055_1_gi219124945	22332	1	AB26B_ARATH	ABC	Multidrug (P-glycoprotein homolog) (ABCB/MDR-type)	ABC transporter b family member chloroplastic	Signal peptide	No tree (< 4 taxa)
Stramenopiles-Thalassiosira_pseudonana_CCMP1335_gi224000101	262120	1	AB11G_ARATH	ABC	White pigment protein homolog (ABCG)	ABC transporter g family member 11	No N-terminal target peptide	No tree (< 4 taxa)
Stramenopiles-Thalassiosira_pseudonana_CCMP1335_gi224009722	24925	1	AB11G_ARATH	ABC	White pigment protein homolog (ABCG)	ABC transporter g family member 11	No N-terminal target peptide	No tree (< 4 taxa)
Stramenopiles-Phaeodactylum_tricornutum_CCAP_1055_1_gi219115832	44752	1	ABCGG_DICDI	ABC	Multidrug (ABCG/PDR-type)	ABC transporter g family member 16	No N-terminal target peptide	No tree (< 4 taxa)
Stramenopiles-Thalassiosira_pseudonana_CCMP1335_gi224010770	264421	1	AB31G_ARATH	ABC	Multidrug (ABCG/PDR-type)	ABC transporter g family member 31	No N-terminal target peptide	No tree (< 4 taxa)
Stramenopiles-Thalassiosira_pseudonana_CCMP1335_gi224008546	36947	1	YHDW_ECOLI	ABC	Amino acid	Amino-acid ABC transporter-binding protein yhdw	No N-terminal target peptide	No tree (< 4 taxa)
Stramenopiles-Phaeodactylum_tricornutum_CCAP_1055_1_gi219111373	8821	1	ABCBA_MOUSE	ABC	Mitochondrial peptide export (ABCB/TAP)	ATP-binding cassette sub-family b member mitochondrial	No N-terminal target peptide	No tree (< 4 taxa)
Stramenopiles-Thalassiosira_pseudonana_CCMP1335_gi223995023	32325	1	ABCBA_HUMAN	ABC	Mitochondrial peptide export (ABCB/TAP)	ATP-binding cassette sub-family b member mitochondrial	No N-terminal target peptide	No tree (< 4 taxa)
Stramenopiles-Thalassiosira_pseudonana_CCMP1335_gi223999653	268766	1	ABCBA_MOUSE	ABC	Mitochondrial peptide export (ABCB/TAP)	ATP-binding cassette sub-family b member mitochondrial	No N-terminal target peptide	No tree (< 4 taxa)
Stramenopiles-Thalassiosira_pseudonana_CCMP1335_gi223999121	4287	1	AAPJ_RHIL3	ABC	Amino acid	General l-amino acid-binding periplasmic protein	No N-terminal target peptide	No tree (< 4 taxa)
Stramenopiles-Phaeodactylum_tricornutum_CCAP_1055_1_gi219113167	18693	1	MRP1_CHICK	ABC	Multispecific organic anion/multidrug (ABCC/MRP-type)	Multidrug resistance-associated protein 1	No N-terminal target peptide	No tree (< 4 taxa)
Stramenopiles-Thalassiosira_pseudonana_CCMP1335_gi224012980	264896	1	MRP4_HUMAN	ABC	Multispecific organic anion/multidrug (ABCC/MRP-type)	Multidrug resistance-associated protein 4	No N-terminal target peptide	No tree (< 4 taxa)
Stramenopiles-Phaeodactylum_tricornutum_CCAP_1055_1_gi219125986	5405	1	PSTB1_NATPD	ABC	Phosphate	Phosphate import ATP-binding protein 1	No N-terminal target peptide	No tree (< 4 taxa)
Stramenopiles-Thalassiosira_pseudonana_CCMP1335_gi224010964	10556	3	-	ABC	Molybdenum	P-loop containing nucleoside triphosphate hydrolase	chloroplast	No tree (< 4 taxa)
Stramenopiles-Phaeodactylum_tricornutum_CCAP_1055_1_gi219115189	41857	1	YJJK_ECO57	ABC	? (Uup homolog/duplicated ATPase)	Uncharacterized ABC transporter ATP-binding protein	No N-terminal target peptide	No tree (< 4 taxa)
Stramenopiles-Thalassiosira_pseudonana_CCMP1335_gi223998508	21858	1	Y1252_HAEIN	ABC	? (Uup homolog/duplicated ATPase)	Uncharacterized ABC transporter ATP-binding protein hi_1252	No N-terminal target peptide	No tree (< 4 taxa)
Stramenopiles-Thalassiosira_pseudonana_CCMP1335_gi223999677	262307	1	Y1706_HAEIN	BCCT	Glycine betaine/carnitine/choline	Uncharacterized transporter hi_1706	Type II signal anchor	No tree (< 4 taxa)
Stramenopiles-Phaeodactylum_tricornutum_CCAP_1055_1_gi219120094	8155	1	NIR_EMENI	CEPT	Inner chloroplast membrane translocase (import) Tic55	Nitrite reductase	No N-terminal target peptide	No tree (< 4 taxa)
Stramenopiles-Thalassiosira_pseudonana_CCMP1335_gi223995483	2673	1	-	CEPT	Inner chloroplast membrane translocase (import) Tic55	Rieske domain-containing protein	No N-terminal target peptide	No tree (< 4 taxa)
Stramenopiles-Phaeodactylum_tricornutum_CCAP_1055_1_gi219126157	48793	1	-	Ctr	Copper ion uptake	Ctr copper transporter family	Signal peptide	No tree (< 4 taxa)
Stramenopiles-Phaeodactylum_tricornutum_CCAP_1055_1_gi219128565	40492	2	-	DMT	Phosphate:phosphoenolpyruvate translocator	EamA-like transporter family	No N-terminal target peptide	No tree (< 4 taxa)
Stramenopiles-Phaeodactylum_tricornutum_CCAP_1055_1_gi219112227	43320	1	-	DMT	Phosphate:phosphoenolpyruvate translocator	Phosphate/phosphoenolpyruvate translocator	No N-terminal target peptide	No tree (< 4 taxa)
Stramenopiles-Thalassiosira_pseudonana_CCMP1335_gi223997888	4006	1	-	DMT	Phosphate:phosphoenolpyruvate translocator	Phosphate/phosphoenolpyruvate translocator	No N-terminal target peptide	No tree (< 4 taxa)
Stramenopiles-Thalassiosira_pseudonana_CCMP1335_gi224014387	10533	3	-	DMT	Nucleotide-sugar	Triose or hexose phosphate/phosphate translocator	No N-terminal target peptide	No tree (< 4 taxa)
Stramenopiles-Phaeodactylum_tricornutum_CCAP_1055_1_gi219110551	31465	1	ATPA_THEAB	F-ATPase	Protons (mitochondrial)	ATP synthase subunit alpha	Signal peptide	No tree (< 4 taxa)
Stramenopiles-Phaeodactylum_tricornutum_CCAP_1055_1_gi219124300	14544	1	VATL_PLECA	F-ATPase	Protons (vacuolar)	V-type proton ATPase 16 kDa proteolipid subunit	Type II signal anchor	No tree (< 4 taxa)
Stramenopiles-Phaeodactylum_tricornutum_CCAP_1055_1_gi219129311	16442	1	VATL_PLECA	F-ATPase	Protons (vacuolar)	V-type proton ATPase 16 kDa proteolipid subunit	Signal peptide	No tree (< 4 taxa)
Stramenopiles-Thalassiosira_pseudonana_CCMP1335_gi224012757	264807	1	VATL_HUMAN	F-ATPase	Protons (vacuolar)	V-type proton ATPase 16 kDa proteolipid subunit	Signal peptide	No tree (< 4 taxa)
Stramenopiles-Phaeodactylum_tricornutum_CCAP_1055_1_gi219129524	23706	1	VATL2_DEBHA	F-ATPase	Protons (vacuolar)	V-type proton ATPase 16 kDa proteolipid subunit 2	Signal peptide	No tree (< 4 taxa)
Stramenopiles-Phaeodactylum_tricornutum_CCAP_1055_1_gi219113669	44050	2	VATG2_MOUSE	F-ATPase	Protons (vacuolar)	V-type proton ATPase subunit g 2	No N-terminal target peptide	No tree (< 4 taxa)
Stramenopiles-Phaeodactylum_tricornutum_CCAP_1055_1_gi219123298	47750	3	-	GIC	Glutamate gated ion channel	Ligand-gated ion channel	No N-terminal target peptide	No tree (< 4 taxa)
Stramenopiles-Thalassiosira_pseudonana_CCMP1335_gi224006404	7839	1	GRLE_DICDI	GIC	Glutamate gated ion channel?	Metabotropic glutamate receptor-like protein e	Signal peptide	No tree (< 4 taxa)
Stramenopiles-Thalassiosira_pseudonana_CCMP1335_gi223999975	262078	1	MTR_HAEIN	HAAAP	Tryptophan/tyrosine	Tryptophan-specific transport protein	No N-terminal target peptide	No tree (< 4 taxa)
Stramenopiles-Phaeodactylum_tricornutum_CCAP_1055_1_gi219114911	44439	2	SRP19_METST	IISP	Signal recognition particle (SRP19)	Signal recognition particle 19 kDa protein	No N-terminal target peptide	No tree (< 4 taxa)
Stramenopiles-Thalassiosira_pseudonana_CCMP1335_gi223999423	22323	3	SRP19_ORYSJ	IISP	Signal recognition particle (SRP19)	Signal recognition particle 19 kDa protein	No N-terminal target peptide	No tree (< 4 taxa)
Stramenopiles-Thalassiosira_pseudonana_CCMP1335_gi223992961	268009	3	-	ILT	Iron ion	Ftr1_plasma membrane iron permease	Type II signal anchor	No tree (< 4 taxa)
Stramenopiles-Thalassiosira_pseudonana_CCMP1335_gi223993031	20810	3	-	ILT	Iron ion	Iron permease FTR1 family	Type II signal anchor	No tree (< 4 taxa)
Stramenopiles-Thalassiosira_pseudonana_CCMP1335_gi224010335	10241	2	MPU1_ARATH	LCT	Mannose-P-dolichol utilization defect 1 protein homolog	Mannose-p-dolichol utilization defect 1 protein homolog	chloroplast	No tree (< 4 taxa)
Stramenopiles-Phaeodactylum_tricornutum_CCAP_1055_1_gi219127604	15797	1	ADT4_MACFA	MC	ADP:ATP antiporter	ADP ATP translocase 4	No N-terminal target peptide	No tree (< 4 taxa)
Stramenopiles-Thalassiosira_pseudonana_CCMP1335_gi224000617	22465	1	ADT4_BOVIN	MC	ADP:ATP antiporter	ADP ATP translocase 4	No N-terminal target peptide	No tree (< 4 taxa)
Stramenopiles-Thalassiosira_pseudonana_CCMP1335_gi223996623	2769	1	YMC1_YEAST	MC	?	Carrier protein mitochondrial	No N-terminal target peptide	No tree (< 4 taxa)
Stramenopiles-Phaeodactylum_tricornutum_CCAP_1055_1_gi219123495	37916	1	-	MC	Phosphate	Hypothetical protein	Mitochondrial transit peptide	No tree (< 4 taxa)
Stramenopiles-Phaeodactylum_tricornutum_CCAP_1055_1_gi219130399	50408	1	MCFD_DICDI	MC	Carnitine/acylcarnitine	Mitochondrial substrate carrier family protein d	No N-terminal target peptide	No tree (< 4 taxa)
Stramenopiles-Phaeodactylum_tricornutum_CCAP_1055_1_gi219130665	50542	1	MCFX_DICDI	MC	S-adenosylmethionine	Mitochondrial substrate carrier family protein x	No N-terminal target peptide	No tree (< 4 taxa)
Stramenopiles-Phaeodactylum_tricornutum_CCAP_1055_1_gi219115433	33827	1	TPC_MACFA	MC	Deoxynucleotide	Mitochondrial thiamine pyrophosphate carrier	No N-terminal target peptide	No tree (< 4 taxa)
Stramenopiles-Thalassiosira_pseudonana_CCMP1335_gi223996115	2278	1	TPC1_MAGO7	MC	Deoxynucleotide?	Mitochondrial thiamine pyrophosphate carrier 1	Signal peptide	No tree (< 4 taxa)
Stramenopiles-Thalassiosira_pseudonana_CCMP1335_gi223994101	20766	1	ARAE_ECO57	MFS	Sugar	Arabinose-proton symporter	No N-terminal target peptide	No tree (< 4 taxa)
Stramenopiles-Thalassiosira_pseudonana_CCMP1335_gi224012767	11797	1	-	MFS	Multidrug efflux?	H+ antiporter protein	No N-terminal target peptide	No tree (< 4 taxa)
Stramenopiles-Phaeodactylum_tricornutum_CCAP_1055_1_gi219111051	42868	2	-	MFS	?	Hypothetical protein	Signal peptide	No tree (< 4 taxa)
Stramenopiles-Phaeodactylum_tricornutum_CCAP_1055_1_gi219123085	47588	1	-	MFS	?	Hypothetical protein	Type II signal anchor	No tree (< 4 taxa)
Stramenopiles-Phaeodactylum_tricornutum_CCAP_1055_1_gi219109840	6927	1	PROP_ECO57	MFS	Proline/betaine	Proline betaine transporter	No N-terminal target peptide	No tree (< 4 taxa)
Stramenopiles-Thalassiosira_pseudonana_CCMP1335_gi223994455	1650	2	-	MFS	?	Sugar phosphate permease	No N-terminal target peptide	No tree (< 4 taxa)
Stramenopiles-Thalassiosira_pseudonana_CCMP1335_gi223992983	260914	1	SV2A_RAT	MFS	Synaptic vesicle neurotransmitter	Synaptic vesicle glycoprotein 2a	No N-terminal target peptide	No tree (< 4 taxa)
Stramenopiles-Thalassiosira_pseudonana_CCMP1335_gi224008584	263929	2	-	MFS	Multidrug efflux (Bcr/CflA subfamily)	Transporter/MFS	No N-terminal target peptide	No tree (< 4 taxa)
Stramenopiles-Phaeodactylum_tricornutum_CCAP_1055_1_gi219113149	54187	1	-	MgtE	Magnesium ion	Divalent cation transporter	No N-terminal target peptide	No tree (< 4 taxa)
Stramenopiles-Phaeodactylum_tricornutum_CCAP_1055_1_gi219109627	42538	1	PIP27_MAIZE	MIP	Aquaporin water channel	Aquaporin pip2-7	No N-terminal target peptide	No tree (< 4 taxa)
Stramenopiles-Phaeodactylum_tricornutum_CCAP_1055_1_gi219110355	43157	3	-	MIP	Aquaporin water channel	Major intrinsic protein (MIP) superfamily	No N-terminal target peptide	No tree (< 4 taxa)
Stramenopiles-Thalassiosira_pseudonana_CCMP1335_gi223995147	2356	3	-	MIP	Aquaporin water channel	Major intrinsic protein (MIP) superfamily/amphipathic channel	Signal peptide	No tree (< 4 taxa)
Stramenopiles-Phaeodactylum_tricornutum_CCAP_1055_1_gi219127729	49418	1	-	MIT	Mitochondrial inner membrane magnesium ion channel protein (MRS2)	Hypothetical protein	No N-terminal target peptide	No tree (< 4 taxa)
Stramenopiles-Thalassiosira_pseudonana_CCMP1335_gi223998458	3611	2	-	MIT	Mitochondrial inner membrane magnesium ion channel protein (MRS2)	Hypothetical protein	No N-terminal target peptide	No tree (< 4 taxa)
Stramenopiles-Phaeodactylum_tricornutum_CCAP_1055_1_gi219122407	47346	1	LAL5_ARATH	MOP	Multidrug efflux	Mate efflux family protein lal5	No N-terminal target peptide	No tree (< 4 taxa)
Stramenopiles-Phaeodactylum_tricornutum_CCAP_1055_1_gi219117768	35296	1	S47A1_XENTR	MOP	Multidrug efflux	Multidrug and toxin extrusion protein 1	No N-terminal target peptide	No tree (< 4 taxa)
Stramenopiles-Phaeodactylum_tricornutum_CCAP_1055_1_gi219124464	48159	1	S47A2_RABIT	MOP	Multidrug efflux	Multidrug and toxin extrusion protein 2	No N-terminal target peptide	No tree (< 4 taxa)
Stramenopiles-Thalassiosira_pseudonana_CCMP1335_gi223994031	260862	3	GRPE_HALSA	MPT	Mge1 homolog (motor component)	Protein grpe	No N-terminal target peptide	No tree (< 4 taxa)
Stramenopiles-Phaeodactylum_tricornutum_CCAP_1055_1_gi219119101	35810	3	-	MPT	Import inner membrane translocase Tim23	Tim17/Tim22/Tim23 family	No N-terminal target peptide	No tree (< 4 taxa)
Stramenopiles-Thalassiosira_pseudonana_CCMP1335_gi223993319	20945	3	-	MPT	Inner membrane translocase (import) Tim22	Tim17/Tim22/Tim23 family	No N-terminal target peptide	No tree (< 4 taxa)
Stramenopiles-Thalassiosira_pseudonana_jgi264768	264768	2	-	MPT	Inner membrane translocase (import) Tim23	Tim23-like protein	No N-terminal target peptide	No tree (< 4 taxa)
Stramenopiles-Thalassiosira_pseudonana_CCMP1335_gi224009954	9840	1	NRAM2_ORYSJ	Nramp	Metal ion	Metal transporter nramp2	No N-terminal target peptide	No tree (< 4 taxa)
Stramenopiles-Phaeodactylum_tricornutum_CCAP_1055_1_gi219123170	47653	1	S6A19_RAT	NSS	Sodium ion:neurotransmitter symporter	Sodium-dependent neutral amino acid transporter b at1	No N-terminal target peptide	No tree (< 4 taxa)
Stramenopiles-Thalassiosira_pseudonana_CCMP1335_gi224009353	9602	1	PMA7_ARATH	P-ATPase	Plasma proton	ATPase plasma membrane-type	No N-terminal target peptide	No tree (< 4 taxa)
Stramenopiles-Thalassiosira_pseudonana_jgi264357	264357	1	-	P-ATPase	Copper ion	ATP-dependent copper transporter	No N-terminal target peptide	No tree (< 4 taxa)
Stramenopiles-Phaeodactylum_tricornutum_CCAP_1055_1_gi219126485	52468	1	AHM7_ARATH	P-ATPase	Copper ion	Copper-transporting ATPase 3	No N-terminal target peptide	No tree (< 4 taxa)
Stramenopiles-Phaeodactylum_tricornutum_CCAP_1055_1_gi219121854	47218	1	PTR17_ARATH	POT	Proton:dipeptide/tripeptide symporter	Probable peptide nitrate transporter at1g62200	No N-terminal target peptide	No tree (< 4 taxa)
Stramenopiles-Thalassiosira_pseudonana_CCMP1335_gi224007960	263852	1	YBAR_BACSU	SulP	Sulfate	Sulfate transporter ybar	No N-terminal target peptide	No tree (< 4 taxa)
Stramenopiles-Phaeodactylum_tricornutum_CCAP_1055_1_gi219118030	45427	3	-	Tat	Protein export	Hypothetical protein	Signal peptide	No tree (< 4 taxa)
Stramenopiles-Phaeodactylum_tricornutum_CCAP_1055_1_gi219122308	52200	3	-	Tat	Protein export	Hypothetical protein	Signal peptide	No tree (< 4 taxa)
Stramenopiles-Thalassiosira_pseudonana_CCMP1335_gi223999843	262004	1	CNG3_CHICK	VIC	Cyclic nucleotide-gated ion channel	Cyclic nucleotide-gated channel rod photoreceptor subunit alpha	Signal peptide	No tree (< 4 taxa)
Stramenopiles-Phaeodactylum_tricornutum_CCAP_1055_1_gi219124483	48178	1	-	VIC	Potassium ion channel	Hypothetical protein	Type II signal anchor	No tree (< 4 taxa)
Stramenopiles-Phaeodactylum_tricornutum_CCAP_1055_1_gi219113639	44021	3	-	VIC	Potassium ion channel	Ion channel	No N-terminal target peptide	No tree (< 4 taxa)
Stramenopiles-Phaeodactylum_tricornutum_CCAP_1055_1_gi219126410	48794	1	KCNAB_DROME	VIC	Potassium ion channel	Potassium voltage-gated channel protein shab	No N-terminal target peptide	No tree (< 4 taxa)
Stramenopiles-Thalassiosira_pseudonana_CCMP1335_gi224011639	10935	1	KCNH1_RAT	VIC	Potassium ion channel subfamily H	Potassium voltage-gated channel subfamily h member 1	No N-terminal target peptide	No tree (< 4 taxa)
Stramenopiles-Thalassiosira_pseudonana_CCMP1335_gi223998202	268454	1	KCNH2_RABIT	VIC	Potassium/sodium hyperpolarization-activated cyclic nucleotide-gatedchannel	Potassium voltage-gated channel subfamily h member 2	No N-terminal target peptide	No tree (< 4 taxa)
Stramenopiles-Thalassiosira_pseudonana_CCMP1335_gi224011311	25377	1	KCNH7_MOUSE	VIC	Potassium ion channel	Potassium voltage-gated channel subfamily h member 7	No N-terminal target peptide	No tree (< 4 taxa)
Stramenopiles-Phaeodactylum_tricornutum_CCAP_1055_1_gi219129768	50123	1	KCNQ2_HUMAN	VIC	Potassium ion channel	Potassium voltage-gated channel subfamily kqt member 2	No N-terminal target peptide	No tree (< 4 taxa)
Stramenopiles-Phaeodactylum_tricornutum_CCAP_1055_1_gi219111611	43314	1	-	VIT	Vacuolar ferrous ion uptake?	CCC1-related family of proteins	No N-terminal target peptide	No tree (< 4 taxa)
Stramenopiles-Thalassiosira_pseudonana_CCMP1335_gi224007082	8111	1	-	VIT	Vacuolar ferrous ion uptake?	CCC1-related family of proteins	No N-terminal target peptide	No tree (< 4 taxa)
Stramenopiles-Phaeodactylum_tricornutum_CCAP_1055_1_gi219128124	49533	100	TLC2_ARATH	AAA	ADP:ATP antiporter	Carrier protein chloroplastic	chloroplast	No tree (informative sites within alignment < 50)
Stramenopiles-Thalassiosira_pseudonana_jgi25177	25177	89	-	AAA	ADP:ATP antiporter	Hypothetical protein/TLC ATP/ADP transporter	Signal peptide	No tree (informative sites within alignment < 50)
Stramenopiles-Thalassiosira_pseudonana_jgi36429	36429	100	-	AAA	ADP:ATP antiporter	Hypothetical protein/TLC ATP/ADP transporter	Signal peptide	No tree (informative sites within alignment < 50)
Stramenopiles-Thalassiosira_pseudonana_jgi9045	9045	96	-	AAA	ADP:ATP antiporter	Hypothetical protein/TLC ATP/ADP transporter	No N-terminal target peptide	No tree (informative sites within alignment < 50)
Stramenopiles-Phaeodactylum_tricornutum_jgi11615	11615	94	-	AAA	ADP:ATP antiporter	Nucleotide transporter 2	Signal peptide	No tree (informative sites within alignment < 50)
Stramenopiles-Phaeodactylum_tricornutum_CCAP_1055_1_gi219125934	48637	42	AVT7_YEAST	AAAP	Amino acid	Vacuolar amino acid transporter 7	No N-terminal target peptide	No tree (informative sites within alignment < 50)
Stramenopiles-Thalassiosira_pseudonana_CCMP1335_gi223999725	4867	40	NTCP2_MOUSE	BASS	Sodium ion:bile acid symporter	Ileal sodium bile acid cotransporter	No N-terminal target peptide	No tree (informative sites within alignment < 50)
Stramenopiles-Thalassiosira_pseudonana_CCMP1335_gi224006576	23976	48	NTCP_MOUSE	BASS	Sodium ion:bile acid symporter	Sodium bile acid cotransporter	Signal peptide	No tree (informative sites within alignment < 50)
Stramenopiles-Phaeodactylum_tricornutum_CCAP_1055_1_gi219121934	13553	100	PNS1_GIBZE	CTL	Sodium ion:choline symporter?	Protein pns1	No N-terminal target peptide	No tree (informative sites within alignment < 50)
Stramenopiles-Phaeodactylum_tricornutum_CCAP_1055_1_gi219122037	5491	100	PNS1_ASPFU	CTL	Sodium ion:choline symporter?	Protein pns1	No N-terminal target peptide	No tree (informative sites within alignment < 50)
Stramenopiles-Thalassiosira_pseudonana_CCMP1335_gi223993759	20595	100	PNS1_USTMA	CTL	Sodium ion:choline symporter?	Protein pns1	No N-terminal target peptide	No tree (informative sites within alignment < 50)
Stramenopiles-Thalassiosira_pseudonana_CCMP1335_gi224001358	22830	100	PNS1_GIBZE	CTL	Sodium ion:choline symporter?	Protein pns1	No N-terminal target peptide	No tree (informative sites within alignment < 50)
Stramenopiles-Phaeodactylum_tricornutum_CCAP_1055_1_gi219119631	20424	99	DUR31_SCHPO	SSS	Urea	Probable urea active transporter 1	Type II signal anchor	No tree (informative sites within alignment < 50)
Stramenopiles-Thalassiosira_pseudonana_CCMP1335_gi223992851	1218	1	YH07_SCHPO	AAAP	Amino acid	Amino acid permease	No N-terminal target peptide	No tree (informative sites within alignment < 50)No tree (< 4 taxa)
Stramenopiles-Phaeodactylum_tricornutum_CCAP_1055_1_gi219126256	48876	1	-	ABC	Multidrug (P-glycoprotein homolog) (ABCB/MDR-type)	ABC-type cobalt transporter system/ATPase component	Signal peptide	No tree (informative sites within alignment < 50)No tree (< 4 taxa)
Stramenopiles-Phaeodactylum_tricornutum_CCAP_1055_1_gi219127702	49398	1	-	ABC	Cobalt ion	ABC-type multidrug transport system/ATPase component	No N-terminal target peptide	No tree (informative sites within alignment < 50)No tree (< 4 taxa)
Stramenopiles-Thalassiosira_pseudonana_CCMP1335_gi224013168	12050	1	PIN5_ARATH	AEC	Auxin efflux?	Auxin efflux carrier component 5	Signal peptide	No tree (informative sites within alignment < 50)No tree (< 4 taxa)
Stramenopiles-Phaeodactylum_tricornutum_CCAP_1055_1_gi219126634	48955	1	LIN54_DROME	CDF	Cation efflux	Protein lin-54 homolog	No N-terminal target peptide	No tree (informative sites within alignment < 50)No tree (< 4 taxa)
Stramenopiles-Phaeodactylum_tricornutum_CCAP_1055_1_gi219127236	49224	1	-	Ctr	Copper ion uptake	Ctr copper transporter family	No N-terminal target peptide	No tree (informative sites within alignment < 50)No tree (< 4 taxa)
Stramenopiles-Phaeodactylum_tricornutum_CCAP_1055_1_gi219112259	43347	1	S35B3_AEDAE	DMT	UDP-galactose?	Adenosine 3-phospho 5-phosphosulfate transporter 2	No N-terminal target peptide	No tree (informative sites within alignment < 50)No tree (< 4 taxa)
Stramenopiles-Thalassiosira_pseudonana_CCMP1335_gi224013604	8831	1	S35B3_DROME	DMT	UDP-galactose?	Adenosine 3-phospho 5-phosphosulfate transporter 2	No N-terminal target peptide	No tree (informative sites within alignment < 50)No tree (< 4 taxa)
Stramenopiles-Thalassiosira_pseudonana_CCMP1335_gi223993979	1186	1	-	DMT	Drug/metabolite?	Hypothetical protein	No N-terminal target peptide	No tree (informative sites within alignment < 50)No tree (< 4 taxa)
Stramenopiles-Phaeodactylum_tricornutum_CCAP_1055_1_gi219117375	45268	1	PPT3_ORYSJ	DMT	Triose phosphate:phosphate translocator	Phosphoenolpyruvate phosphate translocator chloroplastic	Type II signal anchor	No tree (informative sites within alignment < 50)No tree (< 4 taxa)
Stramenopiles-Phaeodactylum_tricornutum_CCAP_1055_1_gi219126858	39529	1	ATP5E_ARATH	F-ATPase	Protons (mitochondrial)	ATP synthase subunit mitochondrial	No N-terminal target peptide	No tree (informative sites within alignment < 50)No tree (< 4 taxa)
Stramenopiles-Thalassiosira_pseudonana_CCMP1335_gi224014636	25499	1	-	MC	Phosphate	Hypothetical protein	No N-terminal target peptide	No tree (informative sites within alignment < 50)No tree (< 4 taxa)
Stramenopiles-Thalassiosira_pseudonana_CCMP1335_gi224005022	6930	1	-	MFS	?	Major facilitator superfamily	No N-terminal target peptide	No tree (informative sites within alignment < 50)No tree (< 4 taxa)
Stramenopiles-Phaeodactylum_tricornutum_CCAP_1055_1_gi219112823	33116	1	PTR36_ARATH	MFS	?	Probable peptide nitrate transporter at3g43790	No N-terminal target peptide	No tree (informative sites within alignment < 50)No tree (< 4 taxa)
Stramenopiles-Thalassiosira_pseudonana_CCMP1335_gi223997832	3954	1	-	MIT	Mitochondrial inner membrane magnesium ion channel protein (MRS2)	CorA-like Mg2+ transporter protein	No N-terminal target peptide	No tree (informative sites within alignment < 50)No tree (< 4 taxa)
Stramenopiles-Phaeodactylum_tricornutum_CCAP_1055_1_gi219122591	47492	1	TOM70_HUMAN	MPT	Outer membrane translocase (import) Tom70	Mitochondrial import receptor subunit Tom70	Signal peptide	No tree (informative sites within alignment < 50)No tree (< 4 taxa)
Stramenopiles-Thalassiosira_pseudonana_CCMP1335_gi223992927	260886	1	PEX10_PICAN	PPI	Peroxisomal protein import (Pex10)	Peroxisome biogenesis factor 10	No N-terminal target peptide	No tree (informative sites within alignment < 50)No tree (< 4 taxa)
Stramenopiles-Thalassiosira_pseudonana_CCMP1335_gi224013361	12172	1	-	TSUP	?	Hypothetical protein	Signal peptide	No tree (informative sites within alignment < 50)No tree (< 4 taxa)
Stramenopiles-Phaeodactylum_tricornutum_CCAP_1055_1_gi219127009	49038	1	-	TSUP	?	Predicted permease	Type II signal anchor	No tree (informative sites within alignment < 50)No tree (< 4 taxa)
Stramenopiles-Thalassiosira_pseudonana_CCMP1335_gi224009742	24939	1	KCO6_ARATH	VIC	Calcium-activated outward-rectifying potassium ion channel	Probable calcium-activated outward-rectifying potassium channel 6	No N-terminal target peptide	No tree (informative sites within alignment < 50)No tree (< 4 taxa)
Stramenopiles-Phaeodactylum_tricornutum_CCAP_1055_1_gi219112667	32938	1	-	VIC	Calcium-activated outward-rectifying potassium ion channel	Voltage-gated potassium channel	Type II signal anchor	No tree (informative sites within alignment < 50)No tree (< 4 taxa)
Stramenopiles-Thalassiosira_pseudonana_CCMP1335_gi223996932	3078	1	K0564_MOUSE	ZIP	Zinc ion	Uncharacterized protein kiaa0564 homolog	Signal peptide	No tree (informative sites within alignment < 50)No tree (< 4 taxa)
Stramenopiles-Thalassiosira_pseudonana_CCMP1335_gi223992713	26553	88	ABCB1_DICDI	ABC	Mitochondrial peptide export (ABCB/TAP)	ABC transporter b family member 1	No N-terminal target peptide	Plantae (Green)
Stramenopiles-Phaeodactylum_tricornutum_CCAP_1055_1_gi219120255	20872	87	AB2C_ARATH	ABC	Multispecific organic anion/multidrug (ABCC/MRP-type)	ABC transporter c family member 2	No N-terminal target peptide	Plantae (Green)
Stramenopiles-Phaeodactylum_tricornutum_CCAP_1055_1_gi219129714	50096	100	AB14G_ARATH	ABC	White pigment protein homolog (ABCG)	ABC transporter g family member 14	No N-terminal target peptide	Plantae (Green)
Stramenopiles-Phaeodactylum_tricornutum_CCAP_1055_1_gi219128916	49856	100	AB7G_ARATH	ABC	White pigment protein homolog (ABCG)	ABC transporter g family member 7	No N-terminal target peptide	Plantae (Green)
Stramenopiles-Thalassiosira_pseudonana_CCMP1335_gi224014893	11307	100	AB7G_ARATH	ABC	White pigment protein homolog (ABCG)	ABC transporter g family member 7	No N-terminal target peptide	Plantae (Green)
Stramenopiles-Phaeodactylum_tricornutum_CCAP_1055_1_gi219115701	44639	58	PSTS_HAEIN	ABC	Phosphate	Phosphate-binding protein psts	Signal peptide	Plantae (Green)
Stramenopiles-Thalassiosira_pseudonana_CCMP1335_gi224002016	262506	55	PSTS_RHILO	ABC	Phosphate	Phosphate-binding protein psts	Signal peptide	Plantae (Green)
Stramenopiles-Phaeodactylum_tricornutum_CCAP_1055_1_gi219117071	35058	60	CA053_HUMAN	ABC	Iron(III)	Uncharacterized protein C1orf53	No N-terminal target peptide	Plantae (Green)
Stramenopiles-Thalassiosira_pseudonana_CCMP1335_gi224003187	6592	61	CA053_HUMAN	ABC	Iron(III)	Uncharacterized protein C1orf53	No N-terminal target peptide	Plantae (Green)
Stramenopiles-Thalassiosira_pseudonana_CCMP1335_gi224007767	14347	100	-	APC	Amino acid/polyamine	Amino acid transporter	Signal peptide	Plantae (Green)
Stramenopiles-Phaeodactylum_tricornutum_CCAP_1055_1_gi219115996	11160	100	-	APC	Amino acid/polyamine	Transmembrane amino acid transporter protein	Signal peptide	Plantae (Green)
Stramenopiles-Phaeodactylum_tricornutum_CCAP_1055_1_gi219110951	9233	100	Y1691_LEGPH	APC	Amino acid/polyamine	Uncharacterized transporter lpg1691	No N-terminal target peptide	Plantae (Green)
Stramenopiles-Thalassiosira_pseudonana_CCMP1335_gi224002374	34333	100	Y1691_LEGPH	APC	Amino acid/polyamine	Uncharacterized transporter lpg1691	No N-terminal target peptide	Plantae (Green)
Stramenopiles-Thalassiosira_pseudonana_CCMP1335_gi224013810	681	100	Y1691_LEGPH	APC	Amino acid/polyamine	Uncharacterized transporter lpg1691	Signal peptide	Plantae (Green)
Stramenopiles-Phaeodactylum_tricornutum_CCAP_1055_1_gi219112919	33218	44	ARSB_DICDI	ArsB	Arsenite (ArsB)	Transporter arsb	No N-terminal target peptide	Plantae (Green)
Stramenopiles-Thalassiosira_pseudonana_CCMP1335_gi223996331	21292	47	ARSB_DICDI	ArsB	Arsenite (ArsB)	Transporter arsb	No N-terminal target peptide	Plantae (Green)
Stramenopiles-Phaeodactylum_tricornutum_CCAP_1055_1_gi219119566	36253	56	NTCP7_DANRE	BASS	Sodium ion:bile acid symporter	Sodium bile acid cotransporter 7	No N-terminal target peptide	Plantae (Green)
Stramenopiles-Phaeodactylum_tricornutum_CCAP_1055_1_gi219124720	38498	73	NTCP7_DANRE	BASS	Sodium ion:bile acid symporter	Sodium bile acid cotransporter 7	No N-terminal target peptide	Plantae (Green)
Stramenopiles-Phaeodactylum_tricornutum_CCAP_1055_1_gi219124722	48117	74	NTCP7_DANRE	BASS	Sodium ion:bile acid symporter	Sodium bile acid cotransporter 7	No N-terminal target peptide	Plantae (Green)
Stramenopiles-Thalassiosira_pseudonana_CCMP1335_gi224010976	10566	38	-	CaCA	Sodium ion:calcium ion+potassium ion antiporter	Sodium/calcium exchanger protein	Type II signal anchor	Plantae (Green)
Stramenopiles-Phaeodactylum_tricornutum_CCAP_1055_1_gi219118736	2762	100	CAX5_ARATH	CaCA	Proton:calcium ion antiporter	Vacuolar cation proton exchanger 5	No N-terminal target peptide	Plantae (Green)
Stramenopiles-Thalassiosira_pseudonana_CCMP1335_gi224004102	23356	53	DHAR3_ARATH	CLIC	Plant intracellular channel protein DHAR1 homolog (glutathione dehydrogenase/dehydroascorbate reduct	Glutathione S-transferase chloroplastic	chloroplast	Plantae (Green)
Stramenopiles-Phaeodactylum_tricornutum_CCAP_1055_1_gi219120379	36641	53	DHAR1_ARATH	CLIC	Plant intracellular channel protein DHAR1 homolog (glutathione dehydrogenase/dehydroascorbate reduct	Glutathione S-transferase mitochondrial	No N-terminal target peptide	Plantae (Green)
Stramenopiles-Phaeodactylum_tricornutum_CCAP_1055_1_gi219125414	22453	86	SAC1_CHLRE	DASS	Sodium ion:sulfate symporter	Sulfur deprivation response regulator	Signal peptide	Plantae (Green)
Stramenopiles-Phaeodactylum_tricornutum_CCAP_1055_1_gi219125416	14922	86	SAC1_CHLRE	DASS	Sodium ion:sulfate symporter	Sulfur deprivation response regulator	Signal peptide	Plantae (Green)
Stramenopiles-Thalassiosira_pseudonana_CCMP1335_gi224002755	269063	87	SAC1_CHLRE	DASS	Sodium ion:sulfate symporter	Sulfur deprivation response regulator	Signal peptide	Plantae (Green)
Stramenopiles-Thalassiosira_pseudonana_CCMP1335_gi224013124	38789	86	SAC1_CHLRE	DASS	Sodium ion:sulfate symporter	Sulfur deprivation response regulator	No N-terminal target peptide	Plantae (Green)
Stramenopiles-Phaeodactylum_tricornutum_CCAP_1055_1_gi219115545	44500	52	S35B3_AEDAE	DMT	UDP-galactose:UMP antiporter	Adenosine 3-phospho 5-phosphosulfate transporter 2	No N-terminal target peptide	Plantae (Green)
Stramenopiles-Phaeodactylum_tricornutum_CCAP_1055_1_gi219126299	48904	49	S35B3_HUMAN	DMT	UDP-galactose	Adenosine 3-phospho 5-phosphosulfate transporter 2	Type II signal anchor	Plantae (Green)
Stramenopiles-Thalassiosira_pseudonana_CCMP1335_gi223996255	21259	51	S35B3_AEDAE	DMT	UDP-galactose?	Adenosine 3-phospho 5-phosphosulfate transporter 2	No N-terminal target peptide	Plantae (Green)
Stramenopiles-Thalassiosira_pseudonana_CCMP1335_gi224014652	11069	53	S35B3_CAEBR	DMT	UDP-galactose?	Adenosine 3-phospho 5-phosphosulfate transporter 2	No N-terminal target peptide	Plantae (Green)
Stramenopiles-Phaeodactylum_tricornutum_CCAP_1055_1_gi219124920	38686	90	PT106_ARATH	DMT	Phosphate:phosphoenolpyruvate translocator	Probable sugar phosphate phosphate translocator at1g06470	No N-terminal target peptide	Plantae (Green)
Stramenopiles-Thalassiosira_pseudonana_CCMP1335_gi223994499	30882	87	PT106_ARATH	DMT	Triose phosphate:phosphate translocator	Probable sugar phosphate phosphate translocator at1g06470	No N-terminal target peptide	Plantae (Green)
Stramenopiles-Phaeodactylum_tricornutum_CCAP_1055_1_gi219109745	42638	100	S35B1_DICDI	DMT	UDP-galactose:UMP antiporter	Solute carrier family 35 member b1	No N-terminal target peptide	Plantae (Green)
Stramenopiles-Phaeodactylum_tricornutum_CCAP_1055_1_gi219120550	13167	100	S35B1_DICDI	DMT	UDP-galactose:UMP antiporter	Solute carrier family 35 member b1	No N-terminal target peptide	Plantae (Green)
Stramenopiles-Phaeodactylum_tricornutum_CCAP_1055_1_gi219129169	16401	100	S35B1_DICDI	DMT	UDP-galactose:UMP antiporter	Solute carrier family 35 member b1	Type II signal anchor	Plantae (Green)
Stramenopiles-Thalassiosira_pseudonana_CCMP1335_gi223999051	40206	100	S35B1_DICDI	DMT	UDP-galactose:UMP antiporter	Solute carrier family 35 member b1	No N-terminal target peptide	Plantae (Green)
Stramenopiles-Phaeodactylum_tricornutum_CCAP_1055_1_gi219128970	16341	100	S35B1_DROME	DMT	UDP-galactose:UMP antiporter	Solute carrier family 35 member b1 homolog	Signal peptide	Plantae (Green)
Stramenopiles-Thalassiosira_pseudonana_CCMP1335_gi224000595	40489	100	HUT1_KLULA	DMT	UDP-galactose:UMP antiporter	UDP-galactose transporter homolog 1	No N-terminal target peptide	Plantae (Green)
Stramenopiles-Phaeodactylum_tricornutum_CCAP_1055_1_gi219127269	15815	100	HPPA_CLOTE	H+-PPase	Proton (vacuolar)	K(+)-stimulated pyrophosphate-energized sodium pump	Type II signal anchor	Plantae (Green)
Stramenopiles-Thalassiosira_pseudonana_CCMP1335_gi223998802	32586	100	HPPA_CLOTE	H+-PPase	Proton (vacuolar)	K(+)-stimulated pyrophosphate-energized sodium pump	Type II signal anchor	Plantae (Green)
Stramenopiles-Phaeodactylum_tricornutum_CCAP_1055_1_gi219110723	42609	100	SCMC1_HUMAN	MC	Phosphate	Calcium-binding mitochondrial carrier protein s-1	No N-terminal target peptide	Plantae (Green)
Stramenopiles-Thalassiosira_pseudonana_CCMP1335_gi224000219	33915	100	SCMC1_HUMAN	MC	Grave's disease carrier protein (GDC) homolog	Calcium-binding mitochondrial carrier protein s-1	No N-terminal target peptide	Plantae (Green)
Stramenopiles-Thalassiosira_pseudonana_CCMP1335_gi223998566	40010	88	MCFG_DICDI	MC	Carnitine/acylcarnitine	Mitochondrial substrate carrier family protein g	No N-terminal target peptide	Plantae (Green)
Stramenopiles-Thalassiosira_pseudonana_CCMP1335_gi223994079	31126	89	MCFJ_DICDI	MC	?	Mitochondrial substrate carrier family protein j	Signal peptide	Plantae (Green)
Stramenopiles-Thalassiosira_pseudonana_CCMP1335_gi223998704	32876	100	MCFN_DICDI	MC	Phosphate	Mitochondrial substrate carrier family protein n	No N-terminal target peptide	Plantae (Green)
Stramenopiles-Phaeodactylum_tricornutum_CCAP_1055_1_gi219118435	27326	88	MCFS_DICDI	MC	Ornithine?	Mitochondrial substrate carrier family protein s	No N-terminal target peptide	Plantae (Green)
Stramenopiles-Phaeodactylum_tricornutum_CCAP_1055_1_gi219118437	12523	88	MCFS_DICDI	MC	?	Mitochondrial substrate carrier family protein s	No N-terminal target peptide	Plantae (Green)
Stramenopiles-Phaeodactylum_tricornutum_CCAP_1055_1_gi219129442	16517	100	S2538_XENTR	MC	Tricarboxylate?	Solute carrier family 25 member 38	No N-terminal target peptide	Plantae (Green)
Stramenopiles-Phaeodactylum_tricornutum_CCAP_1055_1_gi219130290	2164	59	XYLL1_ARATH	MFS	D-xylose:proton symporter	D-xylose-proton symporter-like 1	Signal peptide	Plantae (Green)
Stramenopiles-Phaeodactylum_tricornutum_CCAP_1055_1_gi219114759	44298	51	IF4G3_HUMAN	MFS	?	Eukaryotic translation initiation factor 4 gamma 3	No N-terminal target peptide	Plantae (Green)
Stramenopiles-Phaeodactylum_tricornutum_CCAP_1055_1_gi219112223	9947	89	PLT4_ARATH	MFS	Sugar	Probable polyol transporter 4	No N-terminal target peptide	Plantae (Green)
Stramenopiles-Phaeodactylum_tricornutum_CCAP_1055_1_gi219123648	47769	90	PLT4_ARATH	MFS	Sugar	Probable polyol transporter 4	No N-terminal target peptide	Plantae (Green)
Stramenopiles-Phaeodactylum_tricornutum_CCAP_1055_1_gi219127827	23260	91	PLT4_ARATH	MFS	Sugar	Probable polyol transporter 4	No N-terminal target peptide	Plantae (Green)
Stramenopiles-Thalassiosira_pseudonana_CCMP1335_gi224010882	14028	90	PLT4_ARATH	MFS	Sugar	Probable polyol transporter 4	No N-terminal target peptide	Plantae (Green)
Stramenopiles-Thalassiosira_pseudonana_CCMP1335_gi224011142	37974	91	PLT4_ARATH	MFS	Sugar	Probable polyol transporter 4	No N-terminal target peptide	Plantae (Green)
Stramenopiles-Phaeodactylum_tricornutum_CCAP_1055_1_gi219116707	19586	55	SPXM2_ORYSI	MFS	?	SPX domain-containing membrane protein _17046	No N-terminal target peptide	Plantae (Green)
Stramenopiles-Thalassiosira_pseudonana_CCMP1335_gi223996021	32092	55	SPXM2_ARATH	MFS	?	SPX domain-containing membrane protein at4g11810	No N-terminal target peptide	Plantae (Green)
Stramenopiles-Thalassiosira_pseudonana_CCMP1335_gi224005439	263327	56	SPXM3_ARATH	MFS	?	SPX domain-containing membrane protein at4g22990	No N-terminal target peptide	Plantae (Green)
Stramenopiles-Phaeodactylum_tricornutum_jgi11826	11826	60	-	MFS	Sugar	Sugar (and other) transporter	No N-terminal target peptide	Plantae (Green)
Stramenopiles-Phaeodactylum_tricornutum_CCAP_1055_1_gi219117909	45672	84	SVOP_XENLA	MFS	Organic cation	Synaptic vesicle 2-related protein	No N-terminal target peptide	Plantae (Green)
Stramenopiles-Thalassiosira_pseudonana_CCMP1335_gi223992897	31226	82	SVOP_XENLA	MFS	Organic cation	Synaptic vesicle 2-related protein	Signal peptide	Plantae (Green)
Stramenopiles-Phaeodactylum_tricornutum_CCAP_1055_1_gi219110657	42545	39	MGTE_THET8	MgtE	Magnesium ion	Magnesium transporter mgte	No N-terminal target peptide	Plantae (Green)
Stramenopiles-Thalassiosira_pseudonana_CCMP1335_gi223999905	262046	41	MGTE_THET8	MgtE	Magnesium ion	Magnesium transporter mgte	Type II signal anchor	Plantae (Green)
Stramenopiles-Phaeodactylum_tricornutum_CCAP_1055_1_gi219120633	54598	51	EDS5_ARATH	MOP	Chloroplast salicylate transporter	Enhanced disease susceptibility 5	Signal peptide	Plantae (Green)
Stramenopiles-Thalassiosira_pseudonana_CCMP1335_gi223999167	262116	55	EDS5_ARATH	MOP	Chloroplast salicylate transporter	Enhanced disease susceptibility 5	No N-terminal target peptide	Plantae (Green)
Stramenopiles-Thalassiosira_pseudonana_CCMP1335_gi224014148	264387	61	EDS5_ARATH	MOP	Chloroplast salicylate transporter	Enhanced disease susceptibility 5	Signal peptide	Plantae (Green)
Stramenopiles-Phaeodactylum_tricornutum_CCAP_1055_1_gi219113729	44111	41	MATE4_ARATH	MOP	Chloroplast salicylate transporter?	Mate efflux family protein chloroplastic	Signal peptide	Plantae (Green)
Stramenopiles-Phaeodactylum_tricornutum_CCAP_1055_1_gi219113731	44112	38	MATE4_ARATH	MOP	Chloroplast salicylate transporter?	Mate efflux family protein chloroplastic	Signal peptide	Plantae (Green)
Stramenopiles-Phaeodactylum_tricornutum_CCAP_1055_1_gi219129081	49843	47	MATE4_ARATH	MOP	Chloroplast salicylate transporter	Mate efflux family protein chloroplastic	No N-terminal target peptide	Plantae (Green)
Stramenopiles-Phaeodactylum_tricornutum_CCAP_1055_1_gi219129296	55128	64	MATE2_ARATH	MOP	Multidrug efflux	Mate efflux family protein chloroplastic	No N-terminal target peptide	Plantae (Green)
Stramenopiles-Thalassiosira_pseudonana_CCMP1335_gi223992715	20651	65	MATE2_ARATH	MOP	Multidrug efflux	Mate efflux family protein chloroplastic	No N-terminal target peptide	Plantae (Green)
Stramenopiles-Thalassiosira_pseudonana_CCMP1335_gi223993149	260974	53	MATE4_ARATH	MOP	Chloroplast salicylate transporter	Mate efflux family protein chloroplastic	Mitochondrial transit peptide	Plantae (Green)
Stramenopiles-Thalassiosira_pseudonana_CCMP1335_gi223993155	31622	53	MATE4_ARATH	MOP	Chloroplast salicylate transporter	Mate efflux family protein chloroplastic	Signal peptide	Plantae (Green)
Stramenopiles-Thalassiosira_pseudonana_CCMP1335_gi224000349	4576	31	MATE3_ARATH	MOP	Multidrug efflux	Mate efflux family protein chloroplastic	Signal peptide	Plantae (Green)
Stramenopiles-Thalassiosira_pseudonana_CCMP1335_gi224001840	5201	70	MATE4_ARATH	MOP	Multidrug efflux	Mate efflux family protein chloroplastic	No N-terminal target peptide	Plantae (Green)
Stramenopiles-Thalassiosira_pseudonana_CCMP1335_gi224005871	263459	41	MATE4_ARATH	MOP	Chloroplast salicylate transporter	Mate efflux family protein chloroplastic	Signal peptide	Plantae (Green)
Stramenopiles-Thalassiosira_pseudonana_CCMP1335_gi224005881	269391	41	MATE4_ARATH	MOP	Chloroplast salicylate transporter	Mate efflux family protein chloroplastic	No N-terminal target peptide	Plantae (Green)
Stramenopiles-Thalassiosira_pseudonana_CCMP1335_gi224006367	7804	76	MATE2_ARATH	MOP	Multidrug efflux	Mate efflux family protein chloroplastic	Mitochondrial transit peptide	Plantae (Green)
Stramenopiles-Phaeodactylum_tricornutum_CCAP_1055_1_gi219116452	44888	74	FRD3_ARATH	MOP	Multidrug efflux	Mate efflux family protein frd3	Signal peptide	Plantae (Green)
Stramenopiles-Phaeodactylum_tricornutum_CCAP_1055_1_gi219118475	35587	31	FRD3_ARATH	MOP	Multidrug efflux	Mate efflux family protein frd3	chloroplast	Plantae (Green)
Stramenopiles-Phaeodactylum_tricornutum_CCAP_1055_1_gi219128065	23253	66	FRD3_ARATH	MOP	Multidrug efflux	Mate efflux family protein frd3	No N-terminal target peptide	Plantae (Green)
Stramenopiles-Thalassiosira_pseudonana_CCMP1335_gi224007112	269448	66	FRD3_ARATH	MOP	Multidrug efflux	Mate efflux family protein frd3	No N-terminal target peptide	Plantae (Green)
Stramenopiles-Phaeodactylum_tricornutum_CCAP_1055_1_gi219109739	17344	64	AZG1_ARATH	NCS2	Xanthine/uracil	Adenine guanine permease azg1	No N-terminal target peptide	Plantae (Green)
Stramenopiles-Phaeodactylum_tricornutum_CCAP_1055_1_gi219124824	52367	55	AHM3_ARATH	P-ATPase	Zinc/cadmium/cobalt ion	Cadmium zinc-transporting ATPase 3	No N-terminal target peptide	Plantae (Green)
Stramenopiles-Thalassiosira_pseudonana_CCMP1335_gi223997222	268458	100	ECA4_ARATH	P-ATPase	Calcium ion	Calcium-transporting ATPase endoplasmic reticulum-type	Type II signal anchor	Plantae (Green)
Stramenopiles-Phaeodactylum_tricornutum_CCAP_1055_1_gi219114963	44474	100	ATC1_DICDI	P-ATPase	Calcium ion	Calcium-transporting ATPase pat1	No N-terminal target peptide	Plantae (Green)
Stramenopiles-Phaeodactylum_tricornutum_CCAP_1055_1_gi219125902	228	100	ECAP_SOLLC	P-ATPase	Calcium ion	Calcium-transporting endoplasmic reticulum-type	Type II signal anchor	Plantae (Green)
Stramenopiles-Thalassiosira_pseudonana_CCMP1335_gi223994413	204	100	ECAP_SOLLC	P-ATPase	Calcium ion	Calcium-transporting endoplasmic reticulum-type	No N-terminal target peptide	Plantae (Green)
Stramenopiles-Thalassiosira_pseudonana_jgi262679	262679	42	-	P-ATPase	Calcium ion	Cation transporting ATPase	Type II signal anchor	Plantae (Green)
Stramenopiles-Phaeodactylum_tricornutum_CCAP_1055_1_gi219114875	10677	72	AHM7_ARATH	P-ATPase	Copper ion	Copper-transporting ATPase 3	No N-terminal target peptide	Plantae (Green)
Stramenopiles-Thalassiosira_pseudonana_jgi261657	261657	55	-	P-ATPase	Zinc/cadmium/cobalt/lead ion	Heavy-metal transporter	No N-terminal target peptide	Plantae (Green)
Stramenopiles-Phaeodactylum_tricornutum_CCAP_1055_1_gi219124711	676	56	CADA_BACPE	P-ATPase	Zinc/cadmium/cobalt ion	Probable cadmium-transporting ATPase	No N-terminal target peptide	Plantae (Green)
Stramenopiles-Phaeodactylum_tricornutum_CCAP_1055_1_gi219129018	23629	35	CTPF_MYCBO	P-ATPase	Calcium ion	Probable cation-transporting ATPase f	No N-terminal target peptide	Plantae (Green)
Stramenopiles-Thalassiosira_pseudonana_CCMP1335_gi224001616	34487	44	CTPF_MYCBO	P-ATPase	Cation	Probable cation-transporting ATPase f	No N-terminal target peptide	Plantae (Green)
Stramenopiles-Thalassiosira_pseudonana_CCMP1335_gi224010143	37662	100	AT2A3_CHICK	P-ATPase	Calcium ion	Sarcoplasmic endoplasmic reticulum calcium ATPase 3	No N-terminal target peptide	Plantae (Green)
Stramenopiles-Thalassiosira_pseudonana_CCMP1335_gi223993879	20656	57	-	SSS	Sodium ion:solute symporter	Sodium:solute symporter family	Type II signal anchor	Plantae (Green)
Stramenopiles-Thalassiosira_pseudonana_CCMP1335_gi224013776	263781	41	YBAR_BACSU	SulP	Sulfate	Sulfate transporter ybar	Signal peptide	Plantae (Green)
Stramenopiles-Phaeodactylum_tricornutum_CCAP_1055_1_gi219119512	12759	68	Y319_MYXXA	TerC	Tellurium ion efflux	Uncharacterized membrane protein stkorf319	Signal peptide	Plantae (Green)
Stramenopiles-Thalassiosira_pseudonana_CCMP1335_gi224000681	33500	66	Y319_MYXXA	TerC	Tellurium ion efflux	Uncharacterized membrane protein stkorf319	Signal peptide	Plantae (Green)
Stramenopiles-Thalassiosira_pseudonana_CCMP1335_gi223993605	261158	37	TPC1_HORVU	VIC	Calcium ion channel	Two pore calcium channel protein 1	Type II signal anchor	Plantae (Green)
Stramenopiles-Phaeodactylum_tricornutum_CCAP_1055_1_gi219110619	6528	68	ZUPT_OCEIH	ZIP	Zinc ion	Zinc transporter	Signal peptide	Plantae (Green)
Stramenopiles-Thalassiosira_pseudonana_CCMP1335_gi223999481	22351	66	ZUPT_NEIMB	ZIP	Zinc ion	Zinc transporter	No N-terminal target peptide	Plantae (Green)
Stramenopiles-Phaeodactylum_tricornutum_CCAP_1055_1_gi219117253	3046	100	YOCS_BACSU	BASS	Sodium ion:bile acid symporter	Uncharacterized sodium-dependent transporter yocs	Signal peptide	Plantae (Red and Green)
Stramenopiles-Thalassiosira_pseudonana_CCMP1335_gi224007377	8416	94	YOCS_BACSU	BASS	Sodium ion:bile acid symporter	Uncharacterized sodium-dependent transporter yocs	Signal peptide	Plantae (Red and Green)
Stramenopiles-Thalassiosira_pseudonana_CCMP1335_gi224008518	711	100	YOCS_BACSU	BASS	Sodium ion:bile acid symporter	Uncharacterized sodium-dependent transporter yocs	No N-terminal target peptide	Plantae (Red and Green)
Stramenopiles-Phaeodactylum_tricornutum_CCAP_1055_1_gi219126343	39274	43	KEA3_ARATH	CPA2	Potassium ion efflux	K(+) efflux antiporter chloroplastic	Signal peptide	Plantae (Red and Green)
Stramenopiles-Thalassiosira_pseudonana_CCMP1335_gi223999563	4710	45	KEA3_ARATH	CPA2	Potassium ion efflux	K(+) efflux antiporter chloroplastic	No N-terminal target peptide	Plantae (Red and Green)
Stramenopiles-Thalassiosira_pseudonana_CCMP1335_gi223999959	262069	43	KEA3_ARATH	CPA2	Potassium/sodium ion:proton antiporter	K(+) efflux antiporter chloroplastic	chloroplast	Plantae (Red and Green)
Stramenopiles-Phaeodactylum_tricornutum_CCAP_1055_1_gi219126224	22803	63	AB2D_ARATH	ABC	Peroxisomal fatty acyl CoA ABC transporter (P-FAT) family	ABC transporter d family member chloroplastic	Signal peptide	Plantae (Red or Green)
Stramenopiles-Thalassiosira_pseudonana_CCMP1335_gi224001866	268863	64	AB2D_ARATH	ABC	Long-chain fatty acid (ALDP homolog/ABCD)	ABC transporter d family member chloroplastic	Signal peptide	Plantae (Red or Green)
Stramenopiles-Thalassiosira_pseudonana_CCMP1335_gi224005993	263349	65	AB2D_ARATH	ABC	Peroxisomal fatty acyl CoA ABC transporter (P-FAT) family	ABC transporter d family member chloroplastic	Signal peptide	Plantae (Red or Green)
Stramenopiles-Thalassiosira_pseudonana_CCMP1335_gi224000713	40554	65	AB5F_ARATH	ABC	? (Uup homolog/duplicated ATPase)	ABC transporter f family member 5	No N-terminal target peptide	Plantae (Red or Green)
Stramenopiles-Phaeodactylum_tricornutum_CCAP_1055_1_gi219128572	49726	100	AB7G_ARATH	ABC	White pigment protein homolog (ABCG)	ABC transporter g family member 7	Signal peptide	Plantae (Red or Green)
Stramenopiles-Thalassiosira_pseudonana_jgi261690	261690	100	-	ABC	White pigment protein homolog (ABCG)	ABC-type multidrug transport/ATPase component	No N-terminal target peptide	Plantae (Red or Green)
Stramenopiles-Phaeodactylum_tricornutum_CCAP_1055_1_gi219123890	14391	41	YHES_ECO57	ABC	? (Uup homolog/duplicated ATPase)	Uncharacterized ABC transporter ATP-binding protein	No N-terminal target peptide	Plantae (Red or Green)
Stramenopiles-Phaeodactylum_tricornutum_CCAP_1055_1_gi219128294	16142	41	YDIF_BACSU	ABC	? (Uup homolog/duplicated ATPase)	Uncharacterized ABC transporter ATP-binding protein	No N-terminal target peptide	Plantae (Red or Green)
Stramenopiles-Thalassiosira_pseudonana_CCMP1335_gi223997230	13551	41	YDIF_BACSU	ABC	? (Uup homolog/duplicated ATPase)	Uncharacterized ABC transporter ATP-binding protein	No N-terminal target peptide	Plantae (Red or Green)
Stramenopiles-Thalassiosira_pseudonana_CCMP1335_gi224004046	13175	65	Y182_SYNY3	ABC	Peroxisomal fatty acyl CoA ABC transporter (P-FAT) family	Uncharacterized ABC transporter ATP-binding protein sll0182	Mitochondrial transit peptide	Plantae (Red or Green)
Stramenopiles-Phaeodactylum_tricornutum_jgi17043	17043	65	-	ABC	? (Uup homolog/duplicated ATPase)	UUP/ATPase components of ABC transporter	No N-terminal target peptide	Plantae (Red or Green)
Stramenopiles-Phaeodactylum_tricornutum_CCAP_1055_1_gi219113341	1534	93	YHW5_SCHPO	AE	Boron efflux	Transporter	No N-terminal target peptide	Plantae (Red or Green)
Stramenopiles-Phaeodactylum_tricornutum_CCAP_1055_1_gi219116448	34425	43	NTCP_HUMAN	BASS	Sodium ion:bile acid symporter	Sodium bile acid cotransporter	Signal peptide	Plantae (Red or Green)
Stramenopiles-Phaeodactylum_tricornutum_CCAP_1055_1_gi219121086	4286	91	YOCS_BACSU	BASS	Sodium ion:bile acid symporter	Uncharacterized sodium-dependent transporter yocs	Signal peptide	Plantae (Red or Green)
Stramenopiles-Thalassiosira_pseudonana_CCMP1335_gi224009928	30004	91	YOCS_BACSU	BASS	Sodium ion:bile acid symporter	Uncharacterized sodium-dependent transporter yocs	No N-terminal target peptide	Plantae (Red or Green)
Stramenopiles-Thalassiosira_pseudonana_jgi262553	262553	89	-	ClC	Chloride ion channel	Chloride channel protein	Mitochondrial transit peptide	Plantae (Red or Green)
Stramenopiles-Phaeodactylum_tricornutum_CCAP_1055_1_gi219112179	43785	89	CLCF_ARATH	ClC	Chloride ion channel	Chloride channel protein CLC-f	Signal peptide	Plantae (Red or Green)
Stramenopiles-Phaeodactylum_tricornutum_CCAP_1055_1_gi219126496	39421	86	CLCF_ARATH	ClC	Chloride ion channel	Chloride channel protein CLC-f	No N-terminal target peptide	Plantae (Red or Green)
Stramenopiles-Phaeodactylum_tricornutum_CCAP_1055_1_gi219121071	46880	53	DHAR2_ARATH	CLIC	Plant intracellular channel protein DHAR1 homolog (glutathione dehydrogenase/dehydroascorbate reduct	Glutathione S-transferase dhar2	Type II signal anchor	Plantae (Red or Green)
Stramenopiles-Phaeodactylum_tricornutum_CCAP_1055_1_gi219117373	11843	48	KEA1_ARATH	CPA2	Potassium ion efflux	K(+) efflux antiporter chloroplastic	Signal peptide	Plantae (Red or Green)
Stramenopiles-Thalassiosira_pseudonana_CCMP1335_gi223998782	33205	48	KEA3_ARATH	CPA2	Potassium ion efflux	K(+) efflux antiporter chloroplastic	Signal peptide	Plantae (Red or Green)
Stramenopiles-Thalassiosira_pseudonana_CCMP1335_gi224014738	38289	50	KEA3_ARATH	CPA2	Potassium ion efflux	K(+) efflux antiporter chloroplastic	No N-terminal target peptide	Plantae (Red or Green)
Stramenopiles-Phaeodactylum_tricornutum_CCAP_1055_1_gi219110683	9444	100	S35B2_HUMAN	DMT	Adenosine 3-phosphate 5-phosphosulfate	Adenosine 3-phospho 5-phosphosulfate transporter 1	No N-terminal target peptide	Plantae (Red or Green)
Stramenopiles-Thalassiosira_pseudonana_CCMP1335_gi224004666	23622	38	-	DMT	Drug/metabolite?	EamA-like transporter family	No N-terminal target peptide	Plantae (Red or Green)
Stramenopiles-Phaeodactylum_tricornutum_CCAP_1055_1_gi219117173	45098	38	-	DMT	Drug/metabolite?	Permease of the drug/metabolite transporter	No N-terminal target peptide	Plantae (Red or Green)
Stramenopiles-Phaeodactylum_tricornutum_CCAP_1055_1_gi219127546	49268	38	-	DMT	Drug/metabolite?	Permease of the drug/metabolite transporter	chloroplast	Plantae (Red or Green)
Stramenopiles-Thalassiosira_pseudonana_CCMP1335_gi223998931	40156	70	ATPG_ODOSI	F-ATPase	Protons (chloroplast)	ATP synthase gamma chloroplastic	chloroplast	Plantae (Red or Green)
Stramenopiles-Phaeodactylum_tricornutum_CCAP_1055_1_gi219124093	21970	100	-	FBT	Folate/pteridine?	Folate/biopterin transporter	No N-terminal target peptide	Plantae (Red or Green)
Stramenopiles-Phaeodactylum_tricornutum_CCAP_1055_1_gi219123693	47802	97	-	FBT	Folate/pteridine?	Hypothetical protein/BT1 family	No N-terminal target peptide	Plantae (Red or Green)
Stramenopiles-Phaeodactylum_tricornutum_CCAP_1055_1_gi219127882	49534	97	-	FBT	Folate/pteridine?	Hypothetical protein/BT1 family	No N-terminal target peptide	Plantae (Red or Green)
Stramenopiles-Thalassiosira_pseudonana_CCMP1335_gi223994491	31372	100	-	FBT	Folate/pteridine?	Hypothetical protein/BT1 family	No N-terminal target peptide	Plantae (Red or Green)
Stramenopiles-Thalassiosira_pseudonana_CCMP1335_gi224002198	15138	97	-	FBT	Folate/pteridine?	Hypothetical protein/BT1 family	Type II signal anchor	Plantae (Red or Green)
Stramenopiles-Thalassiosira_pseudonana_CCMP1335_gi223995869	268147	41	TNAB_ECOLI	HAAAP	Tryptophan/tyrosine	Low affinity tryptophan permease	Type II signal anchor	Plantae (Red or Green)
Stramenopiles-Phaeodactylum_tricornutum_CCAP_1055_1_gi219121461	36976	52	MTR_HAEIN	HAAAP	Tryptophan/tyrosine	Tryptophan-specific transport protein	No N-terminal target peptide	Plantae (Red or Green)
Stramenopiles-Phaeodactylum_tricornutum_CCAP_1055_1_gi219126910	15639	89	PET8_YEAST	MC	S-adenosylmethionine	Mitochondrial carrier protein pet8	No N-terminal target peptide	Plantae (Red or Green)
Stramenopiles-Phaeodactylum_tricornutum_CCAP_1055_1_gi219119273	35984	100	SAMC_XENLA	MC	S-adenosylmethionine	S-adenosylmethionine mitochondrial carrier protein	Signal peptide	Plantae (Red or Green)
Stramenopiles-Phaeodactylum_tricornutum_CCAP_1055_1_gi219122217	21441	100	ANTR1_ARATH	MFS	Phosphate	Sodium-dependent phosphate transport protein chloroplastic	Signal peptide	Plantae (Red or Green)
Stramenopiles-Phaeodactylum_tricornutum_CCAP_1055_1_gi219118316	12188	45	GRPE_SYNJA	MPT	Mge1 homolog (motor component)	Protein grpe	No N-terminal target peptide	Plantae (Red or Green)
Stramenopiles-Thalassiosira_pseudonana_jgi34551	34551	77	-	Oxa1	Chloroplast protein ALBINO3 homolog	60kDa inner membrane protein	No N-terminal target peptide	Plantae (Red or Green)
Stramenopiles-Phaeodactylum_tricornutum_CCAP_1055_1_gi219112651	43657	77	ALB3_ARATH	Oxa1	Chloroplast protein ALBINO3 homolog	Inner membrane protein chloroplastic	chloroplast	Plantae (Red or Green)
Stramenopiles-Phaeodactylum_tricornutum_CCAP_1055_1_gi219120081	46411	76	PPF1_PEA	Oxa1	Chloroplast protein ALBINO3 homolog	Inner membrane protein ppf-chloroplastic	chloroplast	Plantae (Red or Green)
Stramenopiles-Thalassiosira_pseudonana_CCMP1335_gi223995523	268324	81	PPF1_PEA	Oxa1	Chloroplast protein ALBINO3 homolog	Inner membrane protein ppf-chloroplastic	No N-terminal target peptide	Plantae (Red or Green)
Stramenopiles-Phaeodactylum_tricornutum_CCAP_1055_1_gi219125229	14996	36	-	YggT	Potassium ion uptake?	YggT/hypothetical protein	Signal peptide	Plantae (Red or Green)
Stramenopiles-Thalassiosira_pseudonana_CCMP1335_gi223996007	268187	36	-	YggT	Potassium ion uptake?	YggT/hypothetical protein	Signal peptide	Plantae (Red or Green)
Stramenopiles-Thalassiosira_pseudonana_jgi267979	267979	74	-	AE	Sodium ion:bicarbonate symporter	HCO3- transporter family	Type II signal anchor	Plantae (Red)
Stramenopiles-Phaeodactylum_tricornutum_CCAP_1055_1_gi219111471	43194	74	S4A7_RAT	AE	Sodium-driven chloride:bicarbonate anion exchange	Sodium bicarbonate cotransporter 3	chloroplast	Plantae (Red)
Stramenopiles-Phaeodactylum_tricornutum_CCAP_1055_1_gi219129223	40783	82	CORC_BUCAP	HCC	Heavy metal ion	Magnesium and cobalt efflux protein	No N-terminal target peptide	Plantae (Red)
Stramenopiles-Thalassiosira_pseudonana_CCMP1335_gi224006850	23908	78	YHDP_BACSU	HCC	Heavy metal ion	UPF0053 protein yhdp	Signal peptide	Plantae (Red)
Stramenopiles-Phaeodactylum_tricornutum_CCAP_1055_1_gi219110735	9327	79	SECA_SYNJB	IISP	Preprotein translocase SecA	Protein translocase subunit seca	No N-terminal target peptide	Plantae (Red)
Stramenopiles-Thalassiosira_pseudonana_CCMP1335_gi224000249	33558	79	SECA_SYNJA	IISP	Preprotein translocase SecA	Protein translocase subunit seca	No N-terminal target peptide	Plantae (Red)
Stramenopiles-Thalassiosira_pseudonana_CCMP1335_gi223995257	268271	37	SRP54_SYNY3	IISP	Signal recognition particle protein (SRP54)	Signal recognition particle protein	No N-terminal target peptide	Plantae (Red)
Stramenopiles-Phaeodactylum_tricornutum_CCAP_1055_1_gi219117644	35185	34	SRP54_SYNE7	IISP	Signal recognition particle protein (SRP54)	Signal sequence-binding protein	No N-terminal target peptide	Plantae (Red)
Stramenopiles-Phaeodactylum_tricornutum_CCAP_1055_1_gi219109987	17555	100	SAMC_DANRE	MC	S-adenosylmethionine	S-adenosylmethionine mitochondrial carrier protein	No N-terminal target peptide	Plantae (Red)
Stramenopiles-Thalassiosira_pseudonana_CCMP1335_gi223995633	32066	100	S2536_CHICK	MC	Folate?	Solute carrier family 25 member 36	No N-terminal target peptide	Plantae (Red)
Stramenopiles-Phaeodactylum_tricornutum_CCAP_1055_1_gi219115383	26029	100	NRT24_ARATH	MFS	Nitrate	High affinity nitrate transporter	Type II signal anchor	Plantae (Red)
Stramenopiles-Phaeodactylum_tricornutum_CCAP_1055_1_gi219120390	54560	100	NRT24_ARATH	MFS	Nitrate	High affinity nitrate transporter	No N-terminal target peptide	Plantae (Red)
Stramenopiles-Phaeodactylum_tricornutum_CCAP_1055_1_gi219129386	2032	100	NRT25_ARATH	MFS	Nitrate	High affinity nitrate transporter	No N-terminal target peptide	Plantae (Red)
Stramenopiles-Phaeodactylum_tricornutum_CCAP_1055_1_gi219130395	2171	100	NRT26_ARATH	MFS	Nitrate	High affinity nitrate transporter	No N-terminal target peptide	Plantae (Red)
Stramenopiles-Thalassiosira_pseudonana_CCMP1335_gi223995449	39592	100	NRT25_ARATH	MFS	Nitrate	High affinity nitrate transporter	Type II signal anchor	Plantae (Red)
Stramenopiles-Thalassiosira_pseudonana_CCMP1335_gi223998258	27414	100	NRT26_ARATH	MFS	Nitrate	High affinity nitrate transporter	No N-terminal target peptide	Plantae (Red)
Stramenopiles-Thalassiosira_pseudonana_CCMP1335_gi224004506	269274	100	NRT26_ARATH	MFS	Nitrate	High affinity nitrate transporter	Type II signal anchor	Plantae (Red)
Stramenopiles-Phaeodactylum_tricornutum_CCAP_1055_1_gi219112463	54101	100	NRT22_ARATH	MFS	Nitrate	High-affinity nitrate transporter	No N-terminal target peptide	Plantae (Red)
Stramenopiles-Phaeodactylum_tricornutum_CCAP_1055_1_gi219129119	40691	100	NRT21_ARATH	MFS	Nitrate	High-affinity nitrate transporter	No N-terminal target peptide	Plantae (Red)
Stramenopiles-Phaeodactylum_tricornutum_CCAP_1055_1_gi219124553	38642	75	AB25B_ARATH	ABC	Mitochondrial iron transporter(ABCB/ATM1)	ABC transporter b family member mitochondrial	No N-terminal target peptide	Stramenopiles
Stramenopiles-Thalassiosira_pseudonana_CCMP1335_gi224015268	38258	76	AB25B_ARATH	ABC	Mitochondrial iron transporter(ABCB/ATM1)	ABC transporter b family member mitochondrial	Signal peptide	Stramenopiles
Stramenopiles-Phaeodactylum_tricornutum_CCAP_1055_1_gi219114688	18826	76	ABCCC_DICDI	ABC	Multispecific organic anion/multidrug (ABCC/MRP-type)	ABC transporter c family member 12	Type II signal anchor	Stramenopiles
Stramenopiles-Thalassiosira_pseudonana_CCMP1335_gi224009367	12292	93	AB2C_ARATH	ABC	Multispecific organic anion/multidrug (ABCC/MRP-type)	ABC transporter c family member 2	Signal peptide	Stramenopiles
Stramenopiles-Thalassiosira_pseudonana_CCMP1335_gi224004580	41403	81	ABCC3_DICDI	ABC	Multispecific organic anion/multidrug (ABCC/MRP-type)	ABC transporter c family member 3	No N-terminal target peptide	Stramenopiles
Stramenopiles-Thalassiosira_pseudonana_CCMP1335_gi223997840	22016	100	MDR_ORYSJ	ABC	Multidrug (P-glycoprotein homolog) (ABCB/MDR-type)	Multidrug resistance protein	No N-terminal target peptide	Stramenopiles
Stramenopiles-Thalassiosira_pseudonana_CCMP1335_gi224001644	22526	100	MDR3_HUMAN	ABC	Multidrug (P-glycoprotein homolog) (ABCB/MDR-type)	Multidrug resistance protein 3	No N-terminal target peptide	Stramenopiles
Stramenopiles-Phaeodactylum_tricornutum_CCAP_1055_1_gi219111589	43299	94	MRP1_RAT	ABC	Multispecific organic anion/multidrug (ABCC/MRP-type)	Multidrug resistance-associated protein 1	No N-terminal target peptide	Stramenopiles
Stramenopiles-Phaeodactylum_tricornutum_CCAP_1055_1_gi219111949	10151	94	MRP1_MOUSE	ABC	Multispecific organic anion/multidrug (ABCC/MRP-type)	Multidrug resistance-associated protein 1	Type II signal anchor	Stramenopiles
Stramenopiles-Thalassiosira_pseudonana_CCMP1335_gi223999461	40385	94	MRP1_MOUSE	ABC	Multispecific organic anion/multidrug (ABCC/MRP-type)	Multidrug resistance-associated protein 1	Type II signal anchor	Stramenopiles
Stramenopiles-Phaeodactylum_tricornutum_CCAP_1055_1_gi219117604	54405	76	B3AT_MOUSE	AE	Sodium-driven chloride:bicarbonate anion exchange	Band 3 anion transport protein	No N-terminal target peptide	Stramenopiles
Stramenopiles-Phaeodactylum_tricornutum_CCAP_1055_1_gi219118294	45656	75	B3AT_MOUSE	AE	Sodium-driven chloride:bicarbonate anion exchange	Band 3 anion transport protein	chloroplast	Stramenopiles
Stramenopiles-Thalassiosira_pseudonana_jgi260936	260936	72	-	AE	Sodium ion:bicarbonate symporter	HCO3- transporter family	Type II signal anchor	Stramenopiles
Stramenopiles-Phaeodactylum_tricornutum_CCAP_1055_1_gi219126984	54981	100	AMT11_ARATH	Amt	Ammonium	Ammonium transporter 1 member 1	No N-terminal target peptide	Stramenopiles
Stramenopiles-Thalassiosira_pseudonana_CCMP1335_gi223995403	13996	100	AMT11_ORYSJ	Amt	Ammonium	Ammonium transporter 1 member 1	Signal peptide	Stramenopiles
Stramenopiles-Phaeodactylum_tricornutum_CCAP_1055_1_gi219120012	1813	100	AMT12_ORYSJ	Amt	Ammonium	Ammonium transporter 1 member 2	Signal peptide	Stramenopiles
Stramenopiles-Thalassiosira_pseudonana_CCMP1335_gi224006952	36263	100	AMT12_ORYSJ	Amt	Ammonium	Ammonium transporter 1 member 2	Type II signal anchor	Stramenopiles
Stramenopiles-Phaeodactylum_tricornutum_CCAP_1055_1_gi219111759	1862	100	AMT13_ARATH	Amt	Ammonium	Ammonium transporter 1 member 3	Signal peptide	Stramenopiles
Stramenopiles-Phaeodactylum_tricornutum_CCAP_1055_1_gi219120789	13418	100	AMT13_ARATH	Amt	Ammonium	Ammonium transporter 1 member 3	Signal peptide	Stramenopiles
Stramenopiles-Thalassiosira_pseudonana_CCMP1335_gi223996151	268226	100	AMT13_ARATH	Amt	Ammonium	Ammonium transporter 1 member 3	No N-terminal target peptide	Stramenopiles
Stramenopiles-Thalassiosira_pseudonana_CCMP1335_gi224000693	40537	100	AMT13_ARATH	Amt	Ammonium	Ammonium transporter 1 member 3	No N-terminal target peptide	Stramenopiles
Stramenopiles-Thalassiosira_pseudonana_CCMP1335_gi223999783	268793	100	AMT15_ARATH	Amt	Ammonium	Ammonium transporter 1 member 5	No N-terminal target peptide	Stramenopiles
Stramenopiles-Phaeodactylum_tricornutum_CCAP_1055_1_gi219113169	44109	72	ANX13_MOUSE	Annexin	Annexin homolog	Annexin a13	No N-terminal target peptide	Stramenopiles
Stramenopiles-Phaeodactylum_tricornutum_CCAP_1055_1_gi219113723	54190	72	ANX13_HUMAN	Annexin	Annexin homolog	Annexin a13	No N-terminal target peptide	Stramenopiles
Stramenopiles-Thalassiosira_pseudonana_CCMP1335_gi223996521	268316	73	ANX13_MOUSE	Annexin	Annexin homolog	Annexin a13	No N-terminal target peptide	Stramenopiles
Stramenopiles-Thalassiosira_pseudonana_CCMP1335_gi224010040	269792	74	ANXA3_HUMAN	Annexin	Annexin homolog	Annexin a3	No N-terminal target peptide	Stramenopiles
Stramenopiles-Thalassiosira_pseudonana_CCMP1335_gi224000409	262236	58	CTR1_RAT	APC	Amino acid	High affinity cationic amino acid transporter 1	No N-terminal target peptide	Stramenopiles
Stramenopiles-Phaeodactylum_tricornutum_CCAP_1055_1_gi219126465	15324	61	YFNA_BACSU	APC	Amino acid	Uncharacterized amino acid permease	Type II signal anchor	Stramenopiles
Stramenopiles-Thalassiosira_pseudonana_CCMP1335_gi223993957	13922	56	YFNA_BACSU	APC	Amino acid	Uncharacterized amino acid permease	No N-terminal target peptide	Stramenopiles
Stramenopiles-Thalassiosira_pseudonana_CCMP1335_gi224013042	264918	69	YFNA_BACSU	APC	Amino acid	Uncharacterized amino acid permease	Signal peptide	Stramenopiles
Stramenopiles-Thalassiosira_pseudonana_CCMP1335_gi223997372	33256	100	ASNA_AEDAE	ArsAB	Arsenite (ArsA)	ATPase asna1 homolog	No N-terminal target peptide	Stramenopiles
Stramenopiles-Thalassiosira_pseudonana_CCMP1335_gi223993025	1385	59	NTCP7_DANRE	BASS	Sodium ion:bile acid symporter	Sodium bile acid cotransporter 7	Signal peptide	Stramenopiles
Stramenopiles-Phaeodactylum_tricornutum_CCAP_1055_1_gi219116302	11387	100	VCX1_YEAST	CaCA	Proton:calcium ion antiporter	Vacuolar calcium ion transporter	Signal peptide	Stramenopiles
Stramenopiles-Thalassiosira_pseudonana_CCMP1335_gi224006648	8068	100	VCX1_SCHPO	CaCA	Proton:calcium ion antiporter	Vacuolar calcium ion transporter	Signal peptide	Stramenopiles
Stramenopiles-Thalassiosira_pseudonana_CCMP1335_gi224002727	34982	100	CAX5_ARATH	CaCA	Proton:calcium ion antiporter	Vacuolar cation proton exchanger 5	Signal peptide	Stramenopiles
Stramenopiles-Thalassiosira_pseudonana_CCMP1335_gi223995179	31951	100	MTP3_ORYSJ	CDF	Cation efflux	Metal tolerance protein 3	Signal peptide	Stramenopiles
Stramenopiles-Thalassiosira_pseudonana_CCMP1335_gi224006960	7978	82	MTPC4_ARATH	CDF	Cation efflux	Metal tolerance protein c4	No N-terminal target peptide	Stramenopiles
Stramenopiles-Phaeodactylum_tricornutum_CCAP_1055_1_gi219122520	13994	84	ZNT9_MOUSE	CDF	Cation efflux	Zinc transporter 9	No N-terminal target peptide	Stramenopiles
Stramenopiles-Phaeodactylum_tricornutum_CCAP_1055_1_gi219120987	28245	100	CLCN7_RAT	ClC	Chloride ion channel	H(+) Cl(-) exchange transporter 7	No N-terminal target peptide	Stramenopiles
Stramenopiles-Phaeodactylum_tricornutum_CCAP_1055_1_gi219125424	52412	100	CLCN7_MOUSE	ClC	Chloride ion channel	H(+) Cl(-) exchange transporter 7	No N-terminal target peptide	Stramenopiles
Stramenopiles-Phaeodactylum_tricornutum_jgi14403	14403	100	-	CPA1	Sodium ion:proton antiporter	Phospholipase/sodium/hydrogen exchanger 3	Type II signal anchor	Stramenopiles
Stramenopiles-Thalassiosira_pseudonana_CCMP1335_gi224003287	5904	86	SL9A2_HUMAN	CPA1	Sodium ion:proton antiporter	Sodium hydrogen exchanger 2	No N-terminal target peptide	Stramenopiles
Stramenopiles-Phaeodactylum_tricornutum_CCAP_1055_1_gi219113385	1764	100	SL9A8_HUMAN	CPA1	Sodium ion:proton antiporter	Sodium hydrogen exchanger 8	Type II signal anchor	Stramenopiles
Stramenopiles-Phaeodactylum_tricornutum_CCAP_1055_1_gi219124982	22353	100	SL9A8_MOUSE	CPA1	Sodium ion:proton antiporter	Sodium hydrogen exchanger 8	No N-terminal target peptide	Stramenopiles
Stramenopiles-Thalassiosira_pseudonana_CCMP1335_gi224003769	262960	100	SL9A8_RAT	CPA1	Sodium ion:proton antiporter	Sodium hydrogen exchanger 8	No N-terminal target peptide	Stramenopiles
Stramenopiles-Thalassiosira_pseudonana_CCMP1335_gi223996687	21480	32	CTLHB_DICDI	CTL	Sodium ion:choline symporter?	CTL-like protein ddb_g0274487	No N-terminal target peptide	Stramenopiles
Stramenopiles-Phaeodactylum_tricornutum_CCAP_1055_1_gi219121343	36842	40	PNS1_GIBZE	CTL	Sodium ion:choline symporter?	Protein pns1	No N-terminal target peptide	Stramenopiles
Stramenopiles-Phaeodactylum_tricornutum_CCAP_1055_1_gi219112289	3940	100	S35B2_MOUSE	DMT	Adenosine 3-phosphate 5-phosphosulfate	Adenosine 3-phospho 5-phosphosulfate transporter 1	No N-terminal target peptide	Stramenopiles
Stramenopiles-Thalassiosira_pseudonana_CCMP1335_gi224000852	34510	100	S35B2_HUMAN	DMT	Adenosine 3-phosphate 5-phosphosulfate	Adenosine 3-phospho 5-phosphosulfate transporter 1	No N-terminal target peptide	Stramenopiles
Stramenopiles-Thalassiosira_pseudonana_CCMP1335_gi224007539	36481	100	S35B2_HUMAN	DMT	Adenosine 3-phosphate 5-phosphosulfate	Adenosine 3-phospho 5-phosphosulfate transporter 1	No N-terminal target peptide	Stramenopiles
Stramenopiles-Thalassiosira_pseudonana_CCMP1335_gi223995277	2494	100	S35B1_DICDI	DMT	UDP-galactose:UMP antiporter	Solute carrier family 35 member b1	No N-terminal target peptide	Stramenopiles
Stramenopiles-Thalassiosira_pseudonana_CCMP1335_gi224001928	55	100	CB018_HUMAN	DMT	UDP-galactose?	Transmembrane protein c2orf18	Signal peptide	Stramenopiles
Stramenopiles-Phaeodactylum_tricornutum_CCAP_1055_1_gi219121670	47075	100	CB018_PONAB	DMT	Nucleotide-sugar?	Transmembrane protein c2orf18 homolog	No N-terminal target peptide	Stramenopiles
Stramenopiles-Phaeodactylum_tricornutum_CCAP_1055_1_gi219112775	18398	97	ATPG_MAGMM	F-ATPase	Protons (mitochondrial)	ATP synthase gamma chain	Mitochondrial transit peptide	Stramenopiles
Stramenopiles-Phaeodactylum_tricornutum_CCAP_1055_1_gi219119491	20657	69	ATPG_PHATR	F-ATPase	Protons (mitochondrial)	ATP synthase gamma chloroplastic	chloroplast	Stramenopiles
Stramenopiles-Phaeodactylum_tricornutum_CCAP_1055_1_gi219112331	54086	94	ATPB_HEMPU	F-ATPase	Protons (mitochondrial)	ATP synthase subunit mitochondrial	Mitochondrial transit peptide	Stramenopiles
Stramenopiles-Phaeodactylum_tricornutum_CCAP_1055_1_gi219115659	44603	99	ATPO_RHIFE	F-ATPase	Protons (mitochondrial)	ATP synthase subunit mitochondrial	No N-terminal target peptide	Stramenopiles
Stramenopiles-Phaeodactylum_tricornutum_CCAP_1055_1_gi219123736	14618	100	ATPA_MOUSE	F-ATPase	Protons (mitochondrial)	ATP synthase subunit mitochondrial	No N-terminal target peptide	Stramenopiles
Stramenopiles-Thalassiosira_pseudonana_CCMP1335_gi224001684	5026	98	ATPG_MOUSE	F-ATPase	Protons (mitochondrial)	ATP synthase subunit mitochondrial	No N-terminal target peptide	Stramenopiles
Stramenopiles-Thalassiosira_pseudonana_CCMP1335_gi224004096	19298	81	ATPD_DICDI	F-ATPase	Protons (mitochondrial)	ATP synthase subunit mitochondrial	No N-terminal target peptide	Stramenopiles
Stramenopiles-Thalassiosira_pseudonana_CCMP1335_gi224004780	41256	97	ATPB_HEMPU	F-ATPase	Protons (mitochondrial)	ATP synthase subunit mitochondrial	Mitochondrial transit peptide	Stramenopiles
Stramenopiles-Thalassiosira_pseudonana_CCMP1335_gi224005467	269322	100	ATPA_CAEEL	F-ATPase	Protons (mitochondrial)	ATP synthase subunit mitochondrial	Mitochondrial transit peptide	Stramenopiles
Stramenopiles-Thalassiosira_pseudonana_CCMP1335_gi224007136	29359	96	ATPO_HUMAN	F-ATPase	Protons (mitochondrial)	ATP synthase subunit mitochondrial	Mitochondrial transit peptide	Stramenopiles
Stramenopiles-Phaeodactylum_tricornutum_jgi10862	10862	100	-	F-ATPase	Protons (vacuolar)	Det3-like protein/V-ATPase subunit C	No N-terminal target peptide	Stramenopiles
Stramenopiles-Thalassiosira_pseudonana_CCMP1335_gi224009506	37509	100	VA0D_ORYSJ	F-ATPase	Protons (vacuolar)	Probable v-type proton ATPase subunit d	No N-terminal target peptide	Stramenopiles
Stramenopiles-Phaeodactylum_tricornutum_CCAP_1055_1_gi219122580	28794	100	VATM_DICDI	F-ATPase	Protons (vacuolar)	Vacuolar proton translocating ATPase 100 kDa subunit	No N-terminal target peptide	Stramenopiles
Stramenopiles-Thalassiosira_pseudonana_CCMP1335_gi224001992	40728	100	VATM_DICDI	F-ATPase	Protons (vacuolar)	Vacuolar proton translocating ATPase 100 kDa subunit	No N-terminal target peptide	Stramenopiles
Stramenopiles-Phaeodactylum_tricornutum_CCAP_1055_1_gi219116969	11649	100	VATO_MOUSE	F-ATPase	Protons (vacuolar)	V-type proton ATPase 21 kDa proteolipid subunit	Signal peptide	Stramenopiles
Stramenopiles-Phaeodactylum_tricornutum_CCAP_1055_1_gi219120102	27923	100	VATA_DICDI	F-ATPase	Protons (vacuolar)	V-type proton ATPase catalytic subunit a	No N-terminal target peptide	Stramenopiles
Stramenopiles-Thalassiosira_pseudonana_CCMP1335_gi224008993	37123	100	VATA_ARATH	F-ATPase	Protons (vacuolar)	V-type proton ATPase catalytic subunit a	No N-terminal target peptide	Stramenopiles
Stramenopiles-Phaeodactylum_tricornutum_CCAP_1055_1_gi219110321	24978	100	VATB2_HUMAN	F-ATPase	Protons (vacuolar)	V-type proton ATPase subunit brain isoform	No N-terminal target peptide	Stramenopiles
Stramenopiles-Thalassiosira_pseudonana_CCMP1335_gi224000653	40522	100	VATB2_PONAB	F-ATPase	Protons (vacuolar)	V-type proton ATPase subunit brain isoform	No N-terminal target peptide	Stramenopiles
Stramenopiles-Thalassiosira_pseudonana_CCMP1335_gi224005398	29053	100	VTC1A_DANRE	F-ATPase	Protons (vacuolar)	V-type proton ATPase subunit c 1-a	No N-terminal target peptide	Stramenopiles
Stramenopiles-Phaeodactylum_tricornutum_CCAP_1055_1_gi219120855	21030	100	VA0D_DICDI	F-ATPase	Protons (vacuolar)	V-type proton ATPase subunit d	No N-terminal target peptide	Stramenopiles
Stramenopiles-Phaeodactylum_tricornutum_CCAP_1055_1_gi219122457	51058	100	VATD_HUMAN	F-ATPase	Protons (vacuolar)	V-type proton ATPase subunit d	No N-terminal target peptide	Stramenopiles
Stramenopiles-Thalassiosira_pseudonana_CCMP1335_gi223994339	39173	100	VATD_HUMAN	F-ATPase	Protons (vacuolar)	V-type proton ATPase subunit d	No N-terminal target peptide	Stramenopiles
Stramenopiles-Thalassiosira_pseudonana_CCMP1335_gi224005613	29117	100	VATE_DROME	F-ATPase	Protons (vacuolar)	V-type proton ATPase subunit e	No N-terminal target peptide	Stramenopiles
Stramenopiles-Phaeodactylum_tricornutum_CCAP_1055_1_gi219125930	29711	100	VATE1_ARATH	F-ATPase	Protons (vacuolar)	V-type proton ATPase subunit e1	No N-terminal target peptide	Stramenopiles
Stramenopiles-Thalassiosira_pseudonana_CCMP1335_gi224002162	262564	100	VATH_DROME	F-ATPase	Protons (vacuolar)	V-type proton ATPase subunit h	No N-terminal target peptide	Stramenopiles
Stramenopiles-Phaeodactylum_tricornutum_CCAP_1055_1_gi219121107	21183	100	AVP_PHAAU	H+-PPase	Proton (vacuolar)	Pyrophosphate-energized vacuolar membrane proton pump	Signal peptide	Stramenopiles
Stramenopiles-Thalassiosira_pseudonana_CCMP1335_gi223995233	39520	100	AVP1_ARATH	H+-PPase	Proton (vacuolar)	Pyrophosphate-energized vacuolar membrane proton pump 1	Signal peptide	Stramenopiles
Stramenopiles-Thalassiosira_pseudonana_CCMP1335_gi224007140	269456	100	MAM3_YEAST	HCC	Heavy metal ion	Protein mam3	Signal peptide	Stramenopiles
Stramenopiles-Thalassiosira_pseudonana_CCMP1335_gi224003845	28769	100	SC61A_DICDI	IISP	Preprotein translocase Sec61 alpha subunit	Protein transport protein sec61 subunit alpha	Type II signal anchor	Stramenopiles
Stramenopiles-Thalassiosira_pseudonana_CCMP1335_gi224011567	25355	100	SC61A_DICDI	IISP	Preprotein translocase Sec61 alpha subunit	Protein transport protein sec61 subunit alpha	Type II signal anchor	Stramenopiles
Stramenopiles-Phaeodactylum_tricornutum_CCAP_1055_1_gi219121088	13417	100	SRP54_MOUSE	IISP	Signal recognition particle protein (SRP54)	Signal recognition particle 54 kDa protein	No N-terminal target peptide	Stramenopiles
Stramenopiles-Thalassiosira_pseudonana_CCMP1335_gi223993863	260805	100	SRP54_MOUSE	IISP	Signal recognition particle protein (SRP54)	Signal recognition particle 54 kDa protein	No N-terminal target peptide	Stramenopiles
Stramenopiles-Phaeodactylum_tricornutum_jgi41031	41031	100	-	IISP	Preprotein translocase Sec61 alpha subunit	Transport protein Sec61 alpha subunit	Type II signal anchor	Stramenopiles
Stramenopiles-Thalassiosira_pseudonana_CCMP1335_gi223997666	3790	51	CMC_DICDI	MC	Carnitine/acylcarnitine	Calcium-binding mitochondrial carrier protein	No N-terminal target peptide	Stramenopiles
Stramenopiles-Phaeodactylum_tricornutum_CCAP_1055_1_gi219119572	12788	60	YMC1_YEAST	MC	Carnitine/acylcarnitine	Carrier protein mitochondrial	No N-terminal target peptide	Stramenopiles
Stramenopiles-Thalassiosira_pseudonana_CCMP1335_gi224007349	263661	61	YMC1_YEAST	MC	?	Carrier protein mitochondrial	No N-terminal target peptide	Stramenopiles
Stramenopiles-Phaeodactylum_tricornutum_CCAP_1055_1_gi219111133	8990	100	M2OM_HUMAN	MC	2-oxoglutarate/malate	Mitochondrial 2-oxoglutarate malate carrier protein	No N-terminal target peptide	Stramenopiles
Stramenopiles-Thalassiosira_pseudonana_CCMP1335_gi223992871	20731	100	M2OM_HUMAN	MC	2-oxoglutarate/malate	Mitochondrial 2-oxoglutarate malate carrier protein	No N-terminal target peptide	Stramenopiles
Stramenopiles-Thalassiosira_pseudonana_CCMP1335_gi224007861	26366	100	M2OM_NEUCR	MC	Dicarboxylate/tricarboxylate	Mitochondrial 2-oxoglutarate malate carrier protein	No N-terminal target peptide	Stramenopiles
Stramenopiles-Thalassiosira_pseudonana_CCMP1335_gi224007883	263707	85	ORNT1_MOUSE	MC	Ornithine	Mitochondrial ornithine transporter 1	No N-terminal target peptide	Stramenopiles
Stramenopiles-Thalassiosira_pseudonana_CCMP1335_gi224008374	263873	100	MPCP_YEAST	MC	Phosphate	Mitochondrial phosphate carrier protein	No N-terminal target peptide	Stramenopiles
Stramenopiles-Phaeodactylum_tricornutum_CCAP_1055_1_gi219129052	16286	100	MCFB_DICDI	MC	Grave's disease carrier protein (GDC) homolog	Mitochondrial substrate carrier family protein b	No N-terminal target peptide	Stramenopiles
Stramenopiles-Phaeodactylum_tricornutum_CCAP_1055_1_gi219111189	8987	100	MCFN_DICDI	MC	Phosphate	Mitochondrial substrate carrier family protein n	No N-terminal target peptide	Stramenopiles
Stramenopiles-Phaeodactylum_tricornutum_CCAP_1055_1_gi219116522	11414	100	MCFN_DICDI	MC	Phosphate	Mitochondrial substrate carrier family protein n	No N-terminal target peptide	Stramenopiles
Stramenopiles-Phaeodactylum_tricornutum_CCAP_1055_1_gi219124237	47954	100	MCFN_DICDI	MC	Phosphate	Mitochondrial substrate carrier family protein n	Signal peptide	Stramenopiles
Stramenopiles-Thalassiosira_pseudonana_CCMP1335_gi223999231	4387	100	MCFN_DICDI	MC	Phosphate	Mitochondrial substrate carrier family protein n	Signal peptide	Stramenopiles
Stramenopiles-Thalassiosira_pseudonana_CCMP1335_gi224011589	16737	100	MCFN_DICDI	MC	Phosphate	Mitochondrial substrate carrier family protein n	Signal peptide	Stramenopiles
Stramenopiles-Phaeodactylum_tricornutum_CCAP_1055_1_gi219115741	11083	100	PM34_DICDI	MC	Peroxisomal adenine nucleotide carrier PMP34	Mitochondrial substrate carrier family protein q	No N-terminal target peptide	Stramenopiles
Stramenopiles-Phaeodactylum_tricornutum_CCAP_1055_1_gi219129361	23723	97	PM34_DICDI	MC	?	Mitochondrial substrate carrier family protein q	No N-terminal target peptide	Stramenopiles
Stramenopiles-Thalassiosira_pseudonana_CCMP1335_gi224013253	38890	97	PM34_DICDI	MC	Folate?	Mitochondrial substrate carrier family protein q	No N-terminal target peptide	Stramenopiles
Stramenopiles-Phaeodactylum_tricornutum_CCAP_1055_1_gi219113489	5175	81	MCFS_DICDI	MC	Ornithine	Mitochondrial substrate carrier family protein s	No N-terminal target peptide	Stramenopiles
Stramenopiles-Phaeodactylum_tricornutum_CCAP_1055_1_gi219129466	23672	49	MCFS_DICDI	MC	Carnitine/acylcarnitine	Mitochondrial substrate carrier family protein s	No N-terminal target peptide	Stramenopiles
Stramenopiles-Thalassiosira_pseudonana_CCMP1335_gi224002104	5476	59	MCFY_DICDI	MC	?	Mitochondrial substrate carrier family protein y	chloroplast	Stramenopiles
Stramenopiles-Thalassiosira_pseudonana_CCMP1335_gi223997686	3814	84	PM34_HUMAN	MC	?	Peroxisomal membrane protein pmp34	No N-terminal target peptide	Stramenopiles
Stramenopiles-Phaeodactylum_tricornutum_CCAP_1055_1_gi219129954	23908	100	M2OM_DICDI	MC	2-oxoglutarate/malate	Probable mitochondrial 2-oxoglutarate malate carrier protein	No N-terminal target peptide	Stramenopiles
Stramenopiles-Phaeodactylum_tricornutum_CCAP_1055_1_gi219112469	9885	84	SAMC_BOVIN	MC	S-adenosylmethionine	S-adenosylmethionine mitochondrial carrier protein	No N-terminal target peptide	Stramenopiles
Stramenopiles-Phaeodactylum_tricornutum_CCAP_1055_1_gi219111307	17794	100	S2542_XENLA	MC	Grave's disease carrier protein (GDC) homolog	Solute carrier family 25 member 42	No N-terminal target peptide	Stramenopiles
Stramenopiles-Thalassiosira_pseudonana_CCMP1335_gi223992503	31076	100	S2542_XENLA	MC	Grave's disease carrier protein (GDC) homolog	Solute carrier family 25 member 42	No N-terminal target peptide	Stramenopiles
Stramenopiles-Thalassiosira_pseudonana_CCMP1335_gi224005663	41547	100	S2543_DANRE	MC	Grave's disease carrier protein (GDC) homolog	Solute carrier family 25 member 43	No N-terminal target peptide	Stramenopiles
Stramenopiles-Phaeodactylum_tricornutum_CCAP_1055_1_gi219119574	36259	60	S2545_HUMAN	MC	Carnitine/acylcarnitine	Solute carrier family 25 member 45	Mitochondrial transit peptide	Stramenopiles
Stramenopiles-Phaeodactylum_tricornutum_CCAP_1055_1_gi219129526	23709	83	SFC1_YEAST	MC	Succinate:fumarate antiporter	Succinate fumarate mitochondrial transporter	No N-terminal target peptide	Stramenopiles
Stramenopiles-Thalassiosira_pseudonana_CCMP1335_gi224010409	264353	83	SFC1_YEAST	MC	Succinate:fumarate antiporter	Succinate fumarate mitochondrial transporter	No N-terminal target peptide	Stramenopiles
Stramenopiles-Phaeodactylum_tricornutum_CCAP_1055_1_gi219112891	18489	95	TXTP_BOVIN	MC	Tricarboxylate	Tricarboxylate transport mitochondrial	No N-terminal target peptide	Stramenopiles
Stramenopiles-Thalassiosira_pseudonana_CCMP1335_gi223996259	31818	94	TXTP_BOVIN	MC	Tricarboxylate	Tricarboxylate transport mitochondrial	No N-terminal target peptide	Stramenopiles
Stramenopiles-Phaeodactylum_tricornutum_CCAP_1055_1_gi219109601	1598	68	HIAT1_MOUSE	MFS	Tetracycline efflux	Hippocampus abundant transcript 1 protein	Signal peptide	Stramenopiles
Stramenopiles-Thalassiosira_pseudonana_CCMP1335_gi224001914	262480	64	HIAT1_HUMAN	MFS	Tetracycline efflux?	Hippocampus abundant transcript 1 protein	No N-terminal target peptide	Stramenopiles
Stramenopiles-Phaeodactylum_tricornutum_CCAP_1055_1_gi219110809	42677	100	MFSD5_MOUSE	MFS	?	Major facilitator superfamily domain-containing protein 5	Type II signal anchor	Stramenopiles
Stramenopiles-Thalassiosira_pseudonana_CCMP1335_gi223995317	261403	100	MFSD5_MOUSE	MFS	?	Major facilitator superfamily domain-containing protein 5	Signal peptide	Stramenopiles
Stramenopiles-Phaeodactylum_tricornutum_CCAP_1055_1_gi219129048	49971	31	MFSD6_MOUSE	MFS	?	Major facilitator superfamily domain-containing protein 6	No N-terminal target peptide	Stramenopiles
Stramenopiles-Phaeodactylum_tricornutum_CCAP_1055_1_gi219114975	44480	30	MFSD8_XENLA	MFS	?	Major facilitator superfamily domain-containing protein 8	No N-terminal target peptide	Stramenopiles
Stramenopiles-Thalassiosira_pseudonana_CCMP1335_gi223993255	268078	37	MFSD8_XENLA	MFS	?	Major facilitator superfamily domain-containing protein 8	No N-terminal target peptide	Stramenopiles
Stramenopiles-Thalassiosira_pseudonana_jgi264144	264144	100	-	MFS	Phosphate	Phosphate transporter	No N-terminal target peptide	Stramenopiles
Stramenopiles-Thalassiosira_pseudonana_CCMP1335_gi223995329	261414	100	PHT13_ARATH	MFS	Phosphate	Probable inorganic phosphate transporter 1-3	Signal peptide	Stramenopiles
Stramenopiles-Phaeodactylum_tricornutum_CCAP_1055_1_gi219120843	46692	100	PHT16_ARATH	MFS	Phosphate	Probable inorganic phosphate transporter 1-6	No N-terminal target peptide	Stramenopiles
Stramenopiles-Phaeodactylum_tricornutum_CCAP_1055_1_gi219128653	30620	44	GTR1_RABIT	MFS	Glucose	Solute carrier family facilitated glucose transporter member 1	No N-terminal target peptide	Stramenopiles
Stramenopiles-Phaeodactylum_tricornutum_CCAP_1055_1_gi219118853	12520	60	GTR3_SHEEP	MFS	Glucose	Solute carrier family facilitated glucose transporter member 3	Signal peptide	Stramenopiles
Stramenopiles-Thalassiosira_pseudonana_CCMP1335_gi223998314	268472	62	GTR3_CANFA	MFS	Glucose	Solute carrier family facilitated glucose transporter member 3	Type II signal anchor	Stramenopiles
Stramenopiles-Thalassiosira_pseudonana_CCMP1335_gi224003819	269158	65	GTR3_SHEEP	MFS	Glucose	Solute carrier family facilitated glucose transporter member 3	Type II signal anchor	Stramenopiles
Stramenopiles-Thalassiosira_pseudonana_CCMP1335_gi224004958	269231	51	SV2C_MOUSE	MFS	Synaptic vesicle neurotransmitter	Synaptic vesicle glycoprotein 2c	No N-terminal target peptide	Stramenopiles
Stramenopiles-Thalassiosira_pseudonana_CCMP1335_gi224000153	262136	68	TIM44_YEAST	MPT	Inner membrane translocase (import) Tim44	Mitochondrial import inner membrane translocase subunit Tim44	No N-terminal target peptide	Stramenopiles
Stramenopiles-Thalassiosira_pseudonana_CCMP1335_gi224003501	262819	35	TOM70_YEAST	MPT	Outer membrane translocase (import) Tom70	Mitochondrial import receptor subunit Tom70	No N-terminal target peptide	Stramenopiles
Stramenopiles-Thalassiosira_pseudonana_CCMP1335_gi224000838	22579	40	SEC62_SCHPO	NSCC2	Translocation protein Sec62 homolog	Translocation protein sec62	No N-terminal target peptide	Stramenopiles
Stramenopiles-Thalassiosira_pseudonana_CCMP1335_gi223996697	268352	100	ATC4_SCHPO	P-ATPase	Cation	Cation-transporting ATPase 4	No N-terminal target peptide	Stramenopiles
Stramenopiles-Thalassiosira_pseudonana_jgi263051	263051	84	-	P-ATPase	Copper ion	Copper transporter	No N-terminal target peptide	Stramenopiles
Stramenopiles-Thalassiosira_pseudonana_CCMP1335_gi223993145	26702	93	ALA3_ARATH	P-ATPase	Phospholipid	Phospholipid-transporting ATPase 3	Type II signal anchor	Stramenopiles
Stramenopiles-Phaeodactylum_tricornutum_CCAP_1055_1_gi219123520	54778	100	AT2B2_MOUSE	P-ATPase	Calcium ion	Plasma membrane calcium-transporting ATPase 2	No N-terminal target peptide	Stramenopiles
Stramenopiles-Phaeodactylum_tricornutum_CCAP_1055_1_gi219115725	54285	100	ATY1_ARATH	P-ATPase	Cation	Probable cation-transporting ATPase	No N-terminal target peptide	Stramenopiles
Stramenopiles-Phaeodactylum_tricornutum_CCAP_1055_1_gi219124074	54805	100	ATY1_ARATH	P-ATPase	Cation	Probable cation-transporting ATPase	Signal peptide	Stramenopiles
Stramenopiles-Thalassiosira_pseudonana_CCMP1335_gi224004696	29057	100	ATY1_ARATH	P-ATPase	Cation	Probable cation-transporting ATPase	No N-terminal target peptide	Stramenopiles
Stramenopiles-Thalassiosira_pseudonana_CCMP1335_gi224007329	263653	100	AT131_HUMAN	P-ATPase	Cation	Probable cation-transporting ATPase 13a1	No N-terminal target peptide	Stramenopiles
Stramenopiles-Phaeodactylum_tricornutum_CCAP_1055_1_gi219124839	52368	93	AT8A1_BOVIN	P-ATPase	Phospholipid	Probable phospholipid-transporting ATPase ia	No N-terminal target peptide	Stramenopiles
Stramenopiles-Phaeodactylum_tricornutum_CCAP_1055_1_gi219110003	31927	58	PE191_ARATH	PPI2	Peroxisomal protein import (Pex19)	Peroxisome biogenesis protein 19-1	No N-terminal target peptide	Stramenopiles
Stramenopiles-Phaeodactylum_tricornutum_CCAP_1055_1_gi219110193	9625	90	PSNB_DICDI	Presenilin	Presenilin calcium ion leak channel	Presenilin-b	Type II signal anchor	Stramenopiles
Stramenopiles-Thalassiosira_pseudonana_CCMP1335_gi223996727	261548	85	PSNA_ARATH	Presenilin	Presenilin calcium ion leak channel	Presenilin-like protein at1g08700	Type II signal anchor	Stramenopiles
Stramenopiles-Phaeodactylum_tricornutum_CCAP_1055_1_gi219110191	9388	85	PSNB_ARATH	Presenilin	Presenilin calcium ion leak channel	Presenilin-like protein at2g29900	Signal peptide	Stramenopiles
Stramenopiles-Thalassiosira_pseudonana_CCMP1335_gi224002434	268976	87	PSNB_ARATH	Presenilin	Presenilin calcium ion leak channel	Presenilin-like protein at2g29900	No N-terminal target peptide	Stramenopiles
Stramenopiles-Thalassiosira_pseudonana_CCMP1335_gi223995539	2734	36	-	SulP	Sulfate	STAS/SulP-like sulfate transporter	No N-terminal target peptide	Stramenopiles
Stramenopiles-Thalassiosira_pseudonana_CCMP1335_gi223997232	261754	56	YA7B_SCHPO	SulP	Sulfate	Uncharacterized protein	Signal peptide	Stramenopiles
Stramenopiles-Thalassiosira_pseudonana_CCMP1335_gi224006678	24021	67	YA7B_SCHPO	SulP	Sulfate	Uncharacterized protein	No N-terminal target peptide	Stramenopiles
Stramenopiles-Phaeodactylum_tricornutum_CCAP_1055_1_gi219110665	42556	66	YG35_YEAST	SulP	Sulfate	Uncharacterized vacuolar membrane protein ygr125w	No N-terminal target peptide	Stramenopiles
Stramenopiles-Phaeodactylum_tricornutum_CCAP_1055_1_gi219129363	50075	57	YG35_YEAST	SulP	Sulfate	Uncharacterized vacuolar membrane protein ygr125w	No N-terminal target peptide	Stramenopiles
Stramenopiles-Phaeodactylum_tricornutum_CCAP_1055_1_gi219130026	50333	67	YG35_YEAST	SulP	Sulfate	Uncharacterized vacuolar membrane protein ygr125w	No N-terminal target peptide	Stramenopiles
Stramenopiles-Thalassiosira_pseudonana_CCMP1335_gi224004286	23437	66	YG35_YEAST	SulP	Sulfate	Uncharacterized vacuolar membrane protein ygr125w	No N-terminal target peptide	Stramenopiles
Stramenopiles-Thalassiosira_pseudonana_CCMP1335_gi224010581	10191	57	YG35_YEAST	SulP	Sulfate	Uncharacterized vacuolar membrane protein ygr125w	Type II signal anchor	Stramenopiles
Stramenopiles-Thalassiosira_pseudonana_CCMP1335_gi224000870	5119	8	-	MOP	Multidrug efflux	Na+-driven multidrug efflux pump	No N-terminal target peptide	Two-taxa specific to Diatom and Alveolata;
Stramenopiles-Phaeodactylum_tricornutum_CCAP_1055_1_gi219111397	43134	8	YAO6_SCHPO	MOP	Multidrug efflux	Uncharacterized transporter	No N-terminal target peptide	Two-taxa specific to Diatom and Alveolata;
Stramenopiles-Thalassiosira_pseudonana_CCMP1335_gi223994793	1986	8	YL47_SCHPO	MOP	Multidrug efflux	Uncharacterized transporter	No N-terminal target peptide	Two-taxa specific to Diatom and Alveolata;
Stramenopiles-Phaeodactylum_tricornutum_CCAP_1055_1_gi219119943	46302	4	-	VIC	Potassium ion channel	Ion channel	No N-terminal target peptide	Two-taxa specific to Diatom and Alveolata;
Stramenopiles-Thalassiosira_pseudonana_CCMP1335_gi224012795	11826	2	-	ZIP	Zinc ion	Zinc transporter	Type II signal anchor	Two-taxa specific to Diatom and Amoebozoa; No tree (< 4 taxa)
Stramenopiles-Phaeodactylum_tricornutum_CCAP_1055_1_gi219123674	47784	8	-	ClC	Chloride ion channel	CLC voltage-gated chloride channel	No N-terminal target peptide	Two-taxa specific to Diatom and Cyanobacteria;
Stramenopiles-Phaeodactylum_tricornutum_CCAP_1055_1_gi219119027	35733	9	-	DMT	Drug/metabolite?	Hypothetical protein	Signal peptide	Two-taxa specific to Diatom and Excavata;
Stramenopiles-Phaeodactylum_tricornutum_CCAP_1055_1_gi219124099	47846	14	YDN1_SCHPO	ThrE	?	Uncharacterized protein	No N-terminal target peptide	Two-taxa specific to Diatom and Fungi;
Stramenopiles-Phaeodactylum_tricornutum_CCAP_1055_1_gi219122627	47516	2	PEX10_PICAN	PPI	Peroxisomal protein import (Pex10)	Peroxisome biogenesis factor 10	No N-terminal target peptide	Two-taxa specific to Diatom and Fungi; No tree (< 4 taxa)
Stramenopiles-Thalassiosira_pseudonana_CCMP1335_gi224014320	25159	5	-	ABC	Multidrug (P-glycoprotein homolog) (ABCB/MDR-type)	ABC transporter	No N-terminal target peptide	Two-taxa specific to Diatom and Haptophyta;
Stramenopiles-Phaeodactylum_tricornutum_CCAP_1055_1_gi219115423	44398	5	-	ABC	White pigment protein homolog (ABCG)	P-loop containing nucleoside triphosphate hydrolase	No N-terminal target peptide	Two-taxa specific to Diatom and Haptophyta;
Stramenopiles-Thalassiosira_pseudonana_CCMP1335_gi224002635	6031	7	-	DMT	Drug/metabolite?	Hypothetical protein	No N-terminal target peptide	Two-taxa specific to Diatom and Haptophyta;
Stramenopiles-Thalassiosira_pseudonana_CCMP1335_gi224006412	7846	5	-	GIC	Glutamate gated ion channel	Hypothetical protein	No N-terminal target peptide	Two-taxa specific to Diatom and Haptophyta;
Stramenopiles-Thalassiosira_pseudonana_CCMP1335_gi224011818	11461	2	-	MFS	?	Major facilitator superfamily	No N-terminal target peptide	Two-taxa specific to Diatom and Haptophyta; No tree (< 4 taxa)
Stramenopiles-Thalassiosira_pseudonana_CCMP1335_gi224005915	7830	23	GRLE_DICDI	GIC	Glutamate gated ion channel?	Metabotropic glutamate receptor-like protein e	No N-terminal target peptide	Two-taxa specific to Diatom and Metazoa;
Stramenopiles-Phaeodactylum_tricornutum_CCAP_1055_1_gi219117625	54411	7	GABR2_RAT	ABC	Sugar	Gamma-aminobutyric acid type b receptor subunit 2	Signal peptide	Two-taxa specific to Diatom and Proteobacteria;
Stramenopiles-Phaeodactylum_tricornutum_CCAP_1055_1_gi219127081	49097	3	YHDI_CAEEL	Bestrophin	Bestrophin anion channel	Uncharacterized protein	Type II signal anchor	Two-taxa specific to Diatom and Rhodophyta; No tree (< 4 taxa)
Stramenopiles-Thalassiosira_pseudonana_CCMP1335_gi224002020	22713	7	-	CEPT	Outer chloroplast membrane translocase (import) IAP75	Surface antigen/hypothetical protein	No N-terminal target peptide	Two-taxa specific to Diatom and Stramenopiles;
Stramenopiles-Phaeodactylum_tricornutum_CCAP_1055_1_gi219121349	36848	26	CTLHB_DICDI	CTL	Sodium ion:choline symporter?	CTL-like protein ddb_g0274487	Signal peptide	Two-taxa specific to Diatom and Stramenopiles;
Stramenopiles-Thalassiosira_pseudonana_CCMP1335_gi223996401	21324	22	-	FBT	Folate/pteridine?	Hypothetical protein/BT1 family	No N-terminal target peptide	Two-taxa specific to Diatom and Stramenopiles;
Stramenopiles-Phaeodactylum_tricornutum_CCAP_1055_1_gi219128069	49491	7	LAT4_HUMAN	MFS	?	Large neutral amino acids transporter small subunit 4	No N-terminal target peptide	Two-taxa specific to Diatom and Stramenopiles;
Stramenopiles-Thalassiosira_pseudonana_CCMP1335_gi224005711	23782	11	-	MFS	?	Major facilitator superfamily	No N-terminal target peptide	Two-taxa specific to Diatom and Stramenopiles;
Stramenopiles-Phaeodactylum_tricornutum_CCAP_1055_1_gi219125889	48596	7	FMP42_YEAST	MFS	?	Protein fmp42	Type II signal anchor	Two-taxa specific to Diatom and Stramenopiles;
Stramenopiles-Phaeodactylum_tricornutum_CCAP_1055_1_gi219111797	43491	11	-	MFS	?	Vacuole effluxer Atg22 like	No N-terminal target peptide	Two-taxa specific to Diatom and Stramenopiles;
Stramenopiles-Thalassiosira_pseudonana_CCMP1335_gi224009231	9479	11	-	MFS	?	Vacuole effluxer Atg22 like	No N-terminal target peptide	Two-taxa specific to Diatom and Stramenopiles;
Stramenopiles-Thalassiosira_pseudonana_CCMP1335_gi223999159	4318	9	-	MPT	Inner membrane translocase (import) Tim21?	TIM21/Hypothetical protein	No N-terminal target peptide	Two-taxa specific to Diatom and Stramenopiles;
Stramenopiles-Phaeodactylum_tricornutum_CCAP_1055_1_gi219109654	42559	9	TI21L_BOVIN	MPT	Inner membrane translocase (import) Tim21?	Tim21-like mitochondrial	Mitochondrial transit peptide	Two-taxa specific to Diatom and Stramenopiles;
Stramenopiles-Phaeodactylum_tricornutum_CCAP_1055_1_gi219123830	47908	6	AT1A_TAESO	P-ATPase	Sodium ion	Sodium potassium-transporting ATPase subunit alpha	No N-terminal target peptide	Two-taxa specific to Diatom and Stramenopiles;
Stramenopiles-Thalassiosira_pseudonana_CCMP1335_gi223993479	1855	2	-	AEC	Auxin efflux?	Membrane transport protein	Signal peptide	Two-taxa specific to Diatom and Stramenopiles; No tree (< 4 taxa)
Stramenopiles-Thalassiosira_pseudonana_CCMP1335_gi223996637	261499	3	TATA_PROMS	Tat	Protein export	Sec-independent protein translocase protein tata e homolog	Signal peptide	Two-taxa specific to Diatom and Stramenopiles; No tree (< 4 taxa)
Stramenopiles-Phaeodactylum_tricornutum_CCAP_1055_1_gi219112213	32491	5	-	DMT	Drug/metabolite?	EamA-like transporter family	Signal peptide	Two-taxa specific to Diatom and Viridiplantae;
